# Supplementary material for: Improvement of Qualitative Analyses of Aliphatic Alcohols Using Direct Catalytic Fuel Cell and Chemometric Analysis Format
Source: MDPI journal article supplement (doi:10.3390/s24103209), 2024-05-18
Supplement: s1 [file s1]

## **SM1: Supplementary Materials of the paper:**

### **IMPROVEMENT OF QUALITATIVE ANALYSES OF ALIPHATIC ALCOHOLS, USING CATALYTIC FUEL CELL AND CHEMOMETRIC ANALYSIS FORMAT.**

Mauro Tomassetti<sup>1\*</sup>, Federico Marini<sup>1\*</sup>, Riccardo Pezzilli<sup>2</sup>, Mauro Castrucci<sup>1</sup>, Corrado Di Natale<sup>3</sup>, Luigi Campanella<sup>1</sup>

<sup>1</sup>*Department of Chemistry, University of Rome, "La Sapienza", P.le A. Moro 5, 00185 Rome, Italy*

<sup>2</sup>*Department of Industrial Engineering, University of Rome "Tor Vergata", Via del Politecnico 1, 00133*

<sup>3</sup>*Department of Electronic Engineering, University of Rome "Tor Vergata", Via del Politecnico 1, 00133*

*\*mauro.tomassetti@uniroma1.it; \*federico.marini@uniroma1.it*

[SM]

Numerical files of all experimental curves shown in Figures, 2 and 3, numerical file of discharging curves and numerical file of charging curves are placed in a compressed file zip named "[Raw Fuel Cell charge and discharge data](#)".
