# Supplementary material for: Improvement of Qualitative Analyses of Aliphatic Alcohols Using Direct Catalytic Fuel Cell and Chemometric Analysis Format
Source: Sensors (Basel). 2024 May 18;24(10):3209. doi: 10.3390/s24103209 (PMC11124824; doi:10.3390/s24103209)
Supplement: Supplementary file 1 [file sensors-24-03209-s001.zip › Supplementary material.xlsx]

## Sheet: Discharge data
Andamento Scarica
Time	Current	Current	Current	Current	Current	Current		5x10-4 mol L-1 aqueous solutions
s	µA	µA	µA	µA	µA	µA
	Methanol	Ethanol	Propanol	Iso-Propanol	Iso-Amyl	Sec-Butanol
0	1677.5	1342	691.13	931.013	420.717	456.448
1	1546.88	1237.5	637.315	858.518	387.957	420.906
2	1438.75	1151	592.765	798.506	360.839	391.484
3	1347.5	1078	555.17	747.862	337.953	366.655
4	1270.63	1016.5	523.5	705.2	318.674	345.738
5	1201.25	961	494.915	666.694	301.274	326.86
6	1141.88	913.504	470.455	633.743	286.384	310.706
7	1088.75	871	448.565	604.256	273.058	296.249
8	1041.88	833.504	429.255	578.243	261.303	283.496
9	1000.63	800.504	412.26	555.35	250.958	272.271
10	963.125	770.5	396.808	534.534	241.552	262.066
11	929.375	743.5	382.902	515.803	233.087	252.883
12	896.875	717.5	369.512	497.766	224.936	244.04
13	870	696	358.44	482.85	218.196	236.727
14	845	676	348.14	468.975	211.926	229.924
15	822.5	658	338.87	456.488	206.283	223.802
16	800	640	329.6	444	200.64	217.68
17	779.375	623.5	321.103	432.553	195.467	212.068
18	763.125	610.5	314.408	423.534	191.392	207.646
19	745	596	306.94	413.475	186.846	202.714
20	728.75	583	300.245	404.456	182.77	198.293
21	712.5	570	293.55	395.438	178.695	193.871
22	700	560	288.4	388.5	175.56	190.47
23	686.875	549.5	282.993	381.216	172.268	186.899
24	673.125	538.5	277.327	373.584	168.82	183.157
25	663.125	530.5	273.207	368.034	166.312	180.436
26	652.5	522	268.83	362.137	163.647	177.545
27	642.5	514	264.71	356.587	161.139	174.824
28	633.125	506.5	260.848	351.384	158.788	172.273
29	623.75	499	256.985	346.181	156.436	169.722
30	615.625	492.5	253.637	341.672	154.399	167.512
31	606.875	485.5	250.032	336.816	152.204	165.131
32	598.75	479	246.685	332.306	150.167	162.92
33	590.625	472.5	243.338	327.797	148.129	160.709
34	583.75	467	240.505	323.981	146.405	158.838
35	577.5	462	237.93	320.512	144.837	157.138
36	570.625	456.5	235.097	316.697	143.113	155.267
37	564.375	451.5	232.523	313.228	141.545	153.566
38	559.375	447.5	230.463	310.453	140.291	152.206
39	551.875	441.5	227.373	306.291	138.41	150.165
40	548.125	438.5	225.827	304.209	137.47	149.145
41	541.25	433	222.995	300.394	135.745	147.274
42	538.125	430.5	221.708	298.659	134.962	146.424
43	533.125	426.5	219.648	295.884	133.708	145.063
44	528.125	422.5	217.588	293.109	132.454	143.703
45	524.375	419.5	216.042	291.028	131.513	142.682
46	518.75	415	213.725	287.906	130.102	141.152
47	515	412	212.18	285.825	129.162	140.131
48	510.625	408.5	210.377	283.397	128.065	138.941
49	508.125	406.5	209.347	282.009	127.438	138.261
50	503.125	402.5	207.287	279.234	126.184	136.9
51	500	400	206	277.5	125.4	136.05
52	497.5	398	204.97	276.113	124.773	135.37
53	493.75	395	203.425	274.031	123.832	134.349
54	490	392	201.88	271.95	122.892	133.329
55	485.625	388.5	200.077	269.522	121.795	132.139
56	483.063	386.45	199.022	268.1	121.152	131.441
57	481.313	385.05	198.301	267.129	120.713	130.965
58	476.563	381.25	196.344	264.492	119.522	129.673
59	475	380	195.7	263.625	119.13	129.248
60	471.75	377.4	194.361	261.821	118.315	128.363
61	468.5	374.8	193.022	260.017	117.5	127.479
62	466.438	373.15	192.172	258.873	116.983	126.918
63	464.25	371.4	191.271	257.659	116.434	126.322
64	462	369.6	190.344	256.41	115.87	125.71
65	458.5	366.8	188.902	254.468	114.992	124.758
66	456.938	365.55	188.258	253.601	114.6	124.333
67	453.688	362.95	186.919	251.797	113.785	123.448
68	451.125	360.9	185.863	250.374	113.142	122.751
69	450.625	360.5	185.657	250.097	113.017	122.615
70	448.5	358.8	184.782	248.917	112.484	122.037
71	445.688	356.55	183.623	247.357	111.779	121.272
72	442.938	354.35	182.49	245.831	111.089	120.523
73	441.875	353.5	182.053	245.241	110.822	120.234
74	440.375	352.3	181.435	244.408	110.446	119.826
75	438.625	350.9	180.714	243.437	110.007	119.35
76	435	348	179.22	241.425	109.098	118.364
77	432.875	346.3	178.345	240.246	108.565	117.785
78	430.875	344.7	177.52	239.136	108.063	117.241
79	430.75	344.6	177.469	239.066	108.032	117.207
80	428.75	343	176.645	237.956	107.531	116.663
81	427.688	342.15	176.207	237.367	107.264	116.374
82	424.938	339.95	175.074	235.841	106.574	115.626
83	422.813	338.25	174.199	234.661	106.041	115.047
84	421.313	337.05	173.581	233.829	105.665	114.639
85	419.625	335.7	172.886	232.892	105.242	114.18
86	418.625	334.9	172.474	232.337	104.991	113.908
87	416.625	333.3	171.649	231.227	104.49	113.364
88	416.188	332.95	171.469	230.984	104.38	113.245
89	413.5	330.8	170.362	229.493	103.706	112.513
90	412.688	330.15	170.027	229.042	103.502	112.292
91	410.563	328.45	169.152	227.862	102.969	111.714
92	409.75	327.8	168.817	227.411	102.765	111.493
93	407.5	326	167.89	226.162	102.201	110.881
94	406.938	325.55	167.658	225.851	102.06	110.728
95	405.063	324.05	166.886	224.81	101.59	110.218
96	405	324	166.86	224.775	101.574	110.201
97	402.375	321.9	165.779	223.318	100.916	109.486
98	401.375	321.1	165.367	222.763	100.665	109.214
99	399.938	319.95	164.774	221.966	100.304	108.823
100	399.75	319.8	164.697	221.861	100.257	108.772
101	398.063	318.45	164.002	220.925	99.8342	108.313
102	396.75	317.4	163.461	220.196	99.5049	107.956
103	397	317.6	163.564	220.335	99.5676	108.024
104	393.188	314.55	161.993	218.219	98.6115	106.986
105	393.688	314.95	162.199	218.497	98.7369	107.123
106	392.188	313.75	161.581	217.664	98.3607	106.714
107	391	312.8	161.092	217.005	98.0628	106.391
108	389.813	311.85	160.603	216.346	97.7651	106.068
109	389.625	311.7	160.525	216.242	97.718	106.017
110	387.938	310.35	159.83	215.306	97.2948	105.558
111	386.313	309.05	159.161	214.404	96.8873	105.116
112	386	308.8	159.032	214.23	96.8088	105.031
113	385.188	308.15	158.697	213.779	96.6051	104.81
114	381.813	305.45	157.307	211.906	95.7587	103.891
115	382.938	306.35	157.77	212.531	96.0409	104.197
116	381.563	305.25	157.204	211.767	95.696	103.823
117	381.063	304.85	156.998	211.49	95.5706	103.687
118	379.063	303.25	156.174	210.38	95.069	103.143
119	377.063	301.65	155.35	209.27	94.5674	102.599
120	378.063	302.45	155.762	209.825	94.8182	102.871
121	376.938	301.55	155.298	209.201	94.5361	102.565
122	374.125	299.3	154.139	207.639	93.8306	101.799
123	375.188	300.15	154.577	208.229	94.0971	102.089
124	373.188	298.55	153.753	207.119	93.5956	101.544
125	373.188	298.55	153.753	207.119	93.5956	101.544
126	372.375	297.9	153.418	206.668	93.3916	101.323
127	370.75	296.6	152.749	205.766	92.9841	100.881
128	369.938	295.95	152.414	205.316	92.7805	100.66
129	368.875	295.1	151.976	204.726	92.5139	100.371
130	369	295.2	152.028	204.795	92.5452	100.405
131	368.016	294.413	151.623	204.249	92.2984	100.137
132	367.125	293.7	151.256	203.754	92.075	99.8947
133	367.063	293.65	151.23	203.72	92.0594	99.8778
134	363.313	290.65	149.685	201.639	91.1189	98.8575
135	364.875	291.9	150.328	202.506	91.5106	99.2825
136	363.25	290.6	149.659	201.604	91.1031	98.8403
137	362.5	290	149.35	201.188	90.915	98.6363
138	360.813	288.65	148.655	200.251	90.4919	98.1772
139	361.5	289.2	148.938	200.632	90.6642	98.3641
140	359.75	287.8	148.217	199.661	90.2253	97.888
141	358.563	286.85	147.728	199.002	89.9276	97.565
142	358.625	286.9	147.754	199.037	89.9432	97.5819
143	358.5	286.8	147.702	198.968	89.9118	97.5478
144	356.375	285.1	146.827	197.788	89.3788	96.9696
145	356.125	284.9	146.724	197.649	89.3161	96.9016
146	355.172	284.138	146.331	197.12	89.0771	96.6423
147	353.938	283.15	145.822	196.436	88.7677	96.3065
148	354.25	283.4	145.951	196.609	88.8459	96.3914
149	353.016	282.413	145.443	195.924	88.5364	96.0556
150	352.25	281.8	145.127	195.499	88.3443	95.8472
151	351.625	281.3	144.869	195.152	88.1876	95.6772
152	351.188	280.95	144.689	194.909	88.078	95.5583
153	350.203	280.162	144.284	194.363	87.8309	95.2902
154	349	279.2	143.788	193.695	87.5292	94.9629
155	349	279.2	143.788	193.695	87.5292	94.9629
156	348.5	278.8	143.582	193.417	87.4038	94.8268
157	346.938	277.55	142.938	192.551	87.0121	94.4018
158	347.563	278.05	143.196	192.897	87.1688	94.5719
159	345.875	276.7	142.5	191.961	86.7455	94.1126
160	345.625	276.5	142.398	191.822	86.6827	94.0446
161	344.938	275.95	142.114	191.441	86.5105	93.8576
162	344.938	275.95	142.114	191.441	86.5105	93.8576
163	343.875	275.1	141.677	190.851	86.2438	93.5684
164	342.563	274.05	141.136	190.122	85.9148	93.2114
165	341.938	273.55	140.878	189.776	85.758	93.0413
166	341.75	273.4	140.801	189.671	85.7109	92.9902
167	341.438	273.15	140.672	189.498	85.6326	92.9053
168	339.688	271.75	139.951	188.527	85.1937	92.4291
169	339.688	271.75	139.951	188.527	85.1937	92.4291
170	339.125	271.3	139.72	188.214	85.0525	92.2759
171	338.5	270.8	139.462	187.868	84.8958	92.1059
172	338.625	270.9	139.513	187.937	84.9271	92.1399
173	337.5	270	139.05	187.312	84.645	91.8337
174	336.25	269	138.535	186.619	84.3315	91.4936
175	336.563	269.25	138.664	186.792	84.41	91.5788
176	335	268	138.02	185.925	84.018	91.1535
177	336.375	269.1	138.587	186.688	84.3628	91.5276
178	333.375	266.7	137.351	185.023	83.6105	90.7113
179	333.063	266.45	137.222	184.85	83.5322	90.6264
180	334.063	267.25	137.634	185.405	83.783	90.8985
181	332.313	265.85	136.913	184.434	83.3441	90.4224
182	334.188	267.35	137.685	185.474	83.8144	90.9326
183	331.563	265.25	136.604	184.017	83.156	90.2183
184	329.688	263.75	135.831	182.977	82.6857	89.7081
185	330	264	135.96	183.15	82.764	89.793
186	330.5	264.4	136.166	183.428	82.8894	89.9291
187	329.375	263.5	135.702	182.803	82.6072	89.6229
188	327.563	262.05	134.956	181.797	82.1528	89.1299
189	327.25	261.8	134.827	181.624	82.0743	89.0447
190	327.5	262	134.93	181.762	82.137	89.1128
191	327.063	261.65	134.75	181.52	82.0274	88.9938
192	326.563	261.25	134.544	181.242	81.902	88.8578
193	326.063	260.85	134.338	180.965	81.7766	88.7217
194	325.688	260.55	134.183	180.757	81.6826	88.6197
195	324.063	259.25	133.514	179.855	81.275	88.1775
196	323.813	259.05	133.411	179.716	81.2123	88.1095
197	323.5	258.8	133.282	179.542	81.1338	88.0243
198	323.469	258.775	133.269	179.525	81.126	88.0159
199	323.063	258.45	133.102	179.3	81.0242	87.9054
200	323.5	258.8	133.282	179.542	81.1338	88.0243
201	322.063	257.65	132.69	178.745	80.7734	87.6333
202	322.688	258.15	132.947	179.092	80.9301	87.8034
203	320.688	256.55	132.123	177.982	80.4286	87.2592
204	319.938	255.95	131.814	177.566	80.2404	87.0551
205	319.125	255.3	131.48	177.114	80.0366	86.8339
206	318.938	255.15	131.402	177.011	79.9896	86.783
207	318.813	255.05	131.351	176.941	79.9583	86.749
208	318.625	254.9	131.274	176.837	79.9112	86.6979
209	318.563	254.85	131.248	176.802	79.8956	86.681
210	316.125	252.9	130.244	175.449	79.2841	86.0176
211	316.438	253.15	130.372	175.623	79.3627	86.1028
212	315.75	252.6	130.089	175.241	79.1901	85.9156
213	314.625	251.7	129.625	174.617	78.9079	85.6095
214	314.813	251.85	129.703	174.721	78.9551	85.6606
215	314.297	251.438	129.49	174.435	78.8257	85.5202
216	313.813	251.05	129.291	174.166	78.7043	85.3885
217	313.938	251.15	129.342	174.236	78.7357	85.4225
218	313.719	250.975	129.252	174.114	78.6807	85.3629
219	313.438	250.75	129.136	173.958	78.6102	85.2865
220	313.688	250.95	129.239	174.097	78.673	85.3545
221	312.563	250.05	128.776	173.472	78.3908	85.0484
222	311.625	249.3	128.389	172.952	78.1556	84.7932
223	311.375	249.1	128.286	172.813	78.0928	84.7251
224	310.938	248.75	128.106	172.571	77.9832	84.6062
225	310.375	248.3	127.874	172.258	77.8421	84.453
226	310.375	248.3	127.874	172.258	77.8421	84.453
227	308.188	246.55	126.973	171.044	77.2935	83.858
228	309.125	247.3	127.359	171.564	77.5285	84.1129
229	307.688	246.15	126.767	170.767	77.1681	83.7219
230	307.188	245.75	126.561	170.489	77.0427	83.5858
231	307.875	246.3	126.844	170.871	77.2151	83.7728
232	305.625	244.5	125.918	169.622	76.6508	83.1606
233	306.938	245.55	126.458	170.351	76.9801	83.5178
234	303.875	243.1	125.197	168.651	76.2118	82.6844
235	305.563	244.45	125.892	169.587	76.6352	83.1437
236	306.188	244.95	126.149	169.934	76.7919	83.3137
237	304.688	243.75	125.531	169.102	76.4158	82.9056
238	304.625	243.7	125.505	169.067	76.4	82.8885
239	303.813	243.05	125.171	168.616	76.1963	82.6675
240	303.813	243.05	125.171	168.616	76.1963	82.6675
241	302.875	242.3	124.784	168.096	75.9611	82.4123
242	303.438	242.75	125.016	168.408	76.1022	82.5655
243	301.313	241.05	124.141	167.229	75.5693	81.9873
244	303.188	242.55	124.913	168.269	76.0396	82.4975
245	302	241.6	124.424	167.61	75.7416	82.1742
246	302.063	241.65	124.45	167.645	75.7574	82.1913
247	302	241.6	124.424	167.61	75.7416	82.1742
248	300.188	240.15	123.677	166.604	75.2871	81.6812
249	300.25	240.2	123.703	166.639	75.3027	81.698
250	300	240	123.6	166.5	75.24	81.63
251	298.063	238.45	122.802	165.425	74.7542	81.1029
252	298.5	238.8	122.982	165.667	74.8638	81.2219
253	297.188	237.75	122.441	164.939	74.5348	80.8649
254	297.938	238.35	122.75	165.356	74.7228	81.0689
255	296.75	237.4	122.261	164.696	74.4249	80.7457
256	296.688	237.35	122.235	164.662	74.4094	80.7288
257	296.75	237.4	122.261	164.696	74.4249	80.7457
258	296.438	237.15	122.132	164.523	74.3466	80.6608
259	296.156	236.925	122.016	164.367	74.2759	80.5841
260	295.75	236.6	121.849	164.141	74.1741	80.4736
261	295.688	236.55	121.823	164.107	74.1586	80.4567
262	295.063	236.05	121.566	163.76	74.0018	80.2866
263	294.5	235.6	121.334	163.447	73.8606	80.1334
264	294.063	235.25	121.154	163.205	73.751	80.0145
265	295.063	236.05	121.566	163.76	74.0018	80.2866
266	294.094	235.275	121.167	163.222	73.7588	80.023
267	293.625	234.9	120.974	162.962	73.6411	79.8954
268	293.625	234.9	120.974	162.962	73.6411	79.8954
269	291.875	233.5	120.252	161.991	73.2023	79.4192
270	291.813	233.45	120.227	161.956	73.1867	79.4023
271	290.75	232.6	119.789	161.366	72.9201	79.1131
272	291.5	233.2	120.098	161.782	73.1082	79.3171
273	290.188	232.15	119.557	161.054	72.7792	78.9601
274	289.438	231.55	119.248	160.638	72.591	78.7561
275	290.938	232.75	119.866	161.471	72.9673	79.1642
276	289.063	231.25	119.094	160.43	72.497	78.654
277	289.438	231.55	119.248	160.638	72.591	78.7561
278	288.563	230.85	118.888	160.152	72.3716	78.518
279	288.25	230.6	118.759	159.979	72.2931	78.4328
280	287.75	230.2	118.553	159.701	72.1677	78.2968
281	287.5	230	118.45	159.562	72.105	78.2288
282	288.188	230.55	118.733	159.944	72.2776	78.4159
283	287.813	230.25	118.579	159.736	72.1835	78.3139
284	287.594	230.075	118.489	159.615	72.1286	78.2543
285	286.938	229.55	118.218	159.251	71.9641	78.0758
286	287.438	229.95	118.424	159.528	72.0894	78.2119
287	286.063	228.85	117.858	158.765	71.7446	77.8377
288	284.5	227.6	117.214	157.898	71.3526	77.4125
289	284.375	227.5	117.162	157.828	71.3213	77.3784
290	284.313	227.45	117.137	157.794	71.3057	77.3616
291	284.625	227.7	117.266	157.967	71.3839	77.4465
292	283.875	227.1	116.957	157.551	71.1958	77.2424
293	283	226.4	116.596	157.065	70.9764	77.0043
294	283.313	226.65	116.725	157.239	71.0549	77.0895
295	282.563	226.05	116.416	156.822	70.8668	76.8854
296	281.625	225.3	116.029	156.302	70.6316	76.6302
297	281.25	225	115.875	156.094	70.5375	76.5281
298	281.563	225.25	116.004	156.267	70.616	76.6133
299	281.125	224.9	115.823	156.024	70.5062	76.4941
300	280.547	224.438	115.585	155.704	70.3612	76.3368
301	279.875	223.9	115.308	155.331	70.1927	76.154
302	279.625	223.7	115.206	155.192	70.1299	76.086
303	279.813	223.85	115.283	155.296	70.1771	76.1371
304	279.609	223.687	115.199	155.183	70.1259	76.0816
305	279.313	223.45	115.077	155.019	70.0517	76.0011
306	279.688	223.75	115.231	155.227	70.1458	76.1031
307	277.25	221.8	114.227	153.874	69.5343	75.4397
308	278.813	223.05	114.871	154.741	69.9263	75.865
309	277.813	222.25	114.459	154.186	69.6755	75.5929
310	277.688	222.15	114.407	154.117	69.6441	75.5589
311	277.688	222.15	114.407	154.117	69.6441	75.5589
312	277.438	221.95	114.304	153.978	69.5815	75.4909
313	277.813	222.25	114.459	154.186	69.6755	75.5929
314	276	220.8	113.712	153.18	69.2208	75.0996
315	275.125	220.1	113.352	152.694	69.0014	74.8615
316	275.5	220.4	113.506	152.903	69.0954	74.9635
317	275.484	220.387	113.499	152.894	69.0914	74.9592
318	275.625	220.5	113.558	152.972	69.1268	74.9976
319	275.688	220.55	113.583	153.007	69.1425	75.0147
320	275.031	220.025	113.313	152.642	68.9778	74.8359
321	274.625	219.7	113.145	152.417	68.876	74.7255
322	274.188	219.35	112.965	152.174	68.7664	74.6065
323	272.75	218.2	112.373	151.376	68.4057	74.2153
324	273.438	218.75	112.656	151.758	68.5782	74.4025
325	272.563	218.05	112.296	151.272	68.3588	74.1644
326	273.25	218.6	112.579	151.654	68.5311	74.3513
327	273.313	218.65	112.605	151.689	68.5469	74.3685
328	272.719	218.175	112.36	151.359	68.3979	74.2068
329	272.25	217.8	112.167	151.099	68.2803	74.0792
330	272.063	217.65	112.09	150.995	68.2334	74.0283
331	271.125	216.9	111.704	150.474	67.9981	73.7731
332	270.688	216.55	111.523	150.232	67.8885	73.6542
333	269.688	215.75	111.111	149.677	67.6377	73.3821
334	268.75	215	110.725	149.156	67.4025	73.1269
335	270.625	216.5	111.498	150.197	67.8727	73.6371
336	269.563	215.65	111.06	149.607	67.6064	73.3481
337	269.313	215.45	110.957	149.469	67.5437	73.2801
338	269.016	215.213	110.835	149.304	67.4692	73.1993
339	268.438	214.75	110.596	148.983	67.3243	73.042
340	268.75	215	110.725	149.156	67.4025	73.1269
341	267.25	213.8	110.107	148.324	67.0263	72.7187
342	267.438	213.95	110.184	148.428	67.0734	72.7699
343	266.75	213.4	109.901	148.046	66.9009	72.5827
344	267.125	213.7	110.055	148.254	66.995	72.6847
345	266.797	213.438	109.92	148.072	66.9127	72.5955
346	266.438	213.15	109.772	147.873	66.8226	72.4978
347	266.875	213.5	109.953	148.116	66.9322	72.6167
348	264.5	211.6	108.974	146.798	66.3366	71.9704
349	266.25	213	109.695	147.769	66.7755	72.4466
350	265	212	109.18	147.075	66.462	72.1065
351	265.25	212.2	109.283	147.214	66.5247	72.1745
352	264.781	211.825	109.09	146.953	66.4071	72.0469
353	264.438	211.55	108.948	146.763	66.321	71.9536
354	264.438	211.55	108.948	146.763	66.321	71.9536
355	263.5	210.8	108.562	146.243	66.0858	71.6984
356	262	209.6	107.944	145.41	65.7096	71.2902
357	265.25	212.2	109.283	147.214	66.5247	72.1745
358	263.313	210.65	108.485	146.139	66.0389	71.6475
359	261.375	209.1	107.686	145.063	65.5529	71.1201
360	262.5	210	108.15	145.688	65.835	71.4262
361	262.75	210.2	108.253	145.826	65.8977	71.4943
362	262.5	210	108.15	145.688	65.835	71.4262
363	261.844	209.475	107.88	145.323	65.6705	71.2477
364	260.938	208.75	107.506	144.821	65.4433	71.0012
365	261.188	208.95	107.609	144.959	65.5059	71.0692
366	260.484	208.387	107.319	144.569	65.3294	70.8777
367	260	208	107.12	144.3	65.208	70.746
368	259.813	207.85	107.043	144.196	65.1611	70.6951
369	260	208	107.12	144.3	65.208	70.746
370	260.688	208.55	107.403	144.682	65.3805	70.9332
371	260.125	208.1	107.171	144.369	65.2394	70.78
372	259.438	207.55	106.888	143.988	65.067	70.5931
373	258.375	206.7	106.451	143.398	64.8004	70.3038
374	259.125	207.3	106.76	143.814	64.9886	70.5079
375	257.25	205.8	105.987	142.774	64.5183	69.9977
376	258.313	206.65	106.425	143.364	64.7849	70.287
377	258.063	206.45	106.322	143.225	64.7222	70.2189
378	256.75	205.4	105.781	142.496	64.3929	69.8617
379	256.813	205.45	105.807	142.531	64.4087	69.8788
380	257.188	205.75	105.961	142.739	64.5028	69.9809
381	257.188	205.75	105.961	142.739	64.5028	69.9809
382	255.563	204.45	105.292	141.837	64.0952	69.5387
383	256.563	205.25	105.704	142.392	64.346	69.8108
384	254.688	203.75	104.931	141.352	63.8757	69.3006
385	254.563	203.65	104.88	141.282	63.8444	69.2666
386	255.563	204.45	105.292	141.837	64.0952	69.5387
387	253.813	203.05	104.571	140.866	63.6563	69.0625
388	254.563	203.65	104.88	141.282	63.8444	69.2666
389	254.625	203.7	104.906	141.317	63.8599	69.2835
390	255.5	204.4	105.266	141.803	64.0794	69.5216
391	255.125	204.1	105.112	141.594	63.9853	69.4195
392	253.813	203.05	104.571	140.866	63.6563	69.0625
393	254.75	203.8	104.957	141.386	63.8913	69.3175
394	253.625	202.9	104.493	140.762	63.6091	69.0114
395	252.813	202.25	104.159	140.311	63.4055	68.7904
396	253	202.4	104.236	140.415	63.4524	68.8413
397	252.625	202.1	104.082	140.207	63.3584	68.7393
398	252.688	202.15	104.107	140.242	63.3742	68.7564
399	253.063	202.45	104.262	140.45	63.4682	68.8584
400	251.063	200.85	103.438	139.34	62.9666	68.3142
401	252.625	202.1	104.082	140.207	63.3584	68.7393
402	250.125	200.1	103.052	138.819	62.7313	68.059
403	250.375	200.3	103.154	138.958	62.794	68.127
404	250.25	200.2	103.103	138.889	62.7627	68.093
405	250.531	200.425	103.219	139.045	62.8332	68.1695
406	250.813	200.65	103.335	139.201	62.9039	68.2462
407	250.688	200.55	103.283	139.132	62.8725	68.2122
408	250.75	200.6	103.309	139.166	62.8881	68.2291
409	251.125	200.9	103.463	139.374	62.9821	68.3311
410	250.813	200.65	103.335	139.201	62.9039	68.2462
411	250.938	200.75	103.386	139.271	62.9353	68.2802
412	250.438	200.35	103.18	138.993	62.8098	68.1442
413	249.313	199.45	102.717	138.369	62.5277	67.8381
414	248.75	199	102.485	138.056	62.3865	67.6849
415	247.688	198.15	102.047	137.467	62.1202	67.3959
416	246.75	197.4	101.661	136.946	61.8849	67.1407
417	248.125	198.5	102.228	137.709	62.2298	67.5148
418	246.875	197.5	101.713	137.016	61.9162	67.1747
419	247.188	197.75	101.841	137.189	61.9948	67.2599
420	247.75	198.2	102.073	137.501	62.1357	67.4128
421	247.188	197.75	101.841	137.189	61.9948	67.2599
422	247.438	197.95	101.944	137.328	62.0575	67.3279
423	246.188	196.95	101.429	136.634	61.7439	66.9878
424	245.375	196.3	101.094	136.183	61.5401	66.7665
425	246.5	197.2	101.558	136.808	61.8222	67.0726
426	246.25	197	101.455	136.669	61.7595	67.0046
427	246.313	197.05	101.481	136.704	61.7753	67.0218
428	245.688	196.55	101.223	136.357	61.6185	66.8517
429	244.813	195.85	100.863	135.871	61.3991	66.6136
430	245.375	196.3	101.094	136.183	61.5401	66.7665
431	245.938	196.75	101.326	136.496	61.6812	66.9197
432	245.313	196.25	101.069	136.149	61.5245	66.7497
433	244.5	195.6	100.734	135.697	61.3206	66.5285
434	243.688	194.95	100.399	135.247	61.117	66.3075
435	245.688	196.55	101.223	136.357	61.6185	66.8517
436	243.25	194.6	100.219	135.004	61.0071	66.1883
437	244.625	195.7	100.785	135.767	61.352	66.5625
438	243.375	194.7	100.27	135.073	61.0384	66.2223
439	243.625	194.9	100.374	135.212	61.1011	66.2904
440	242.938	194.35	100.09	134.831	60.9288	66.1034
441	242	193.6	99.704	134.31	60.6936	65.8482
442	242.813	194.25	100.039	134.761	60.8975	66.0694
443	242.438	193.95	99.8845	134.553	60.8034	65.9674
444	241.375	193.1	99.4465	133.963	60.5369	65.6781
445	240.625	192.5	99.1375	133.547	60.3488	65.4741
446	241.563	193.25	99.524	134.067	60.584	65.7293
447	240.563	192.45	99.112	133.512	60.3332	65.4572
448	239.75	191.8	98.777	133.061	60.1293	65.236
449	241.313	193.05	99.421	133.929	60.5213	65.6613
450	241.25	193	99.395	133.894	60.5055	65.6441
451	239.875	191.9	98.8285	133.131	60.1606	65.27
452	240.188	192.15	98.9575	133.304	60.2392	65.3551
453	239.625	191.7	98.7255	132.992	60.0979	65.202
454	239.188	191.35	98.5455	132.749	59.9883	65.0831
455	239.25	191.4	98.571	132.784	60.0039	65.0999
456	238.922	191.138	98.4359	132.602	59.9216	65.0107
457	238.563	190.85	98.288	132.402	59.8316	64.913
458	238.688	190.95	98.3395	132.472	59.8629	64.947
459	238.469	190.775	98.2492	132.35	59.808	64.8874
460	238.438	190.75	98.2365	132.333	59.8002	64.879
461	238.188	190.55	98.1335	132.194	59.7375	64.811
462	237.25	189.8	97.747	131.674	59.5023	64.5557
463	237.563	190.05	97.876	131.847	59.5808	64.6409
464	237.875	190.3	98.0045	132.021	59.6591	64.7258
465	237.375	189.9	97.7985	131.743	59.5337	64.5897
466	236.625	189.3	97.4895	131.327	59.3456	64.3857
467	237	189.6	97.644	131.535	59.4396	64.4877
468	236.688	189.35	97.5155	131.362	59.3614	64.4028
469	236.109	188.887	97.2769	131.041	59.2161	64.2453
470	235.188	188.15	96.8975	130.529	58.9851	63.9947
471	235.563	188.45	97.052	130.737	59.0792	64.0967
472	235.625	188.5	97.0775	130.772	59.0947	64.1136
473	235.375	188.3	96.9745	130.633	59.032	64.0455
474	235.625	188.5	97.0775	130.772	59.0947	64.1136
475	234.875	187.9	96.7685	130.356	58.9066	63.9095
476	234.063	187.25	96.434	129.905	58.703	63.6885
477	234.438	187.55	96.5885	130.113	58.797	63.7906
478	234.656	187.725	96.6783	130.234	58.8517	63.8499
479	235.125	188.1	96.8715	130.494	58.9693	63.9775
480	235	188	96.82	130.425	58.938	63.9435
481	233.188	186.55	96.0735	129.419	58.4836	63.4504
482	232.438	185.95	95.7645	129.003	58.2955	63.2464
483	233.688	186.95	96.2795	129.697	58.609	63.5865
484	233.063	186.45	96.022	129.35	58.4522	63.4164
485	233.313	186.65	96.125	129.489	58.5149	63.4845
486	232.438	185.95	95.7645	129.003	58.2955	63.2464
487	232.313	185.85	95.713	128.934	58.2641	63.2124
488	231.938	185.55	95.5585	128.726	58.1701	63.1103
489	230.75	184.6	95.069	128.066	57.8721	62.7871
490	230.938	184.75	95.1465	128.171	57.9192	62.8382
491	231.109	184.887	95.2169	128.266	57.9621	62.8848
492	231.313	185.05	95.301	128.379	58.0133	62.9403
493	231.438	185.15	95.3525	128.448	58.0446	62.9743
494	231.688	185.35	95.4555	128.587	58.1073	63.0423
495	230.688	184.55	95.0435	128.032	57.8565	62.7702
496	229.875	183.9	94.7085	127.581	57.6527	62.549
497	230.875	184.7	95.1205	128.136	57.9034	62.8211
498	230.313	184.25	94.889	127.824	57.7625	62.6682
499	229.938	183.95	94.7345	127.616	57.6684	62.5661
500	230.063	184.05	94.786	127.685	57.6998	62.6001
501	229.813	183.85	94.683	127.546	57.6371	62.5321
502	229.625	183.7	94.6055	127.442	57.59	62.481
503	229.625	183.7	94.6055	127.442	57.59	62.481
504	229.063	183.25	94.374	127.13	57.449	62.328
505	228.375	182.7	94.0905	126.748	57.2764	62.1408
506	229.313	183.45	94.477	127.269	57.5117	62.3961
507	228.625	182.9	94.1935	126.887	57.3391	62.2089
508	227.063	181.65	93.55	126.02	56.9474	61.7838
509	227.875	182.3	93.8845	126.471	57.151	62.0048
510	228.25	182.6	94.039	126.679	57.2451	62.1068
511	226.813	181.45	93.447	125.881	56.8847	61.7158
512	226.188	180.95	93.1895	125.534	56.7279	61.5457
513	228.063	182.45	93.962	126.575	57.1982	62.0559
514	226.563	181.25	93.344	125.742	56.822	61.6478
515	227	181.6	93.524	125.985	56.9316	61.7667
516	228	182.4	93.936	126.54	57.1824	62.0388
517	226.625	181.3	93.3695	125.777	56.8376	61.6647
518	227.063	181.65	93.55	126.02	56.9474	61.7838
519	226.625	181.3	93.3695	125.777	56.8376	61.6647
520	226.188	180.95	93.1895	125.534	56.7279	61.5457
521	226.563	181.25	93.344	125.742	56.822	61.6478
522	225.5	180.4	92.906	125.153	56.5554	61.3586
523	226.188	180.95	93.1895	125.534	56.7279	61.5457
524	223.625	178.9	92.1335	124.112	56.0851	60.8484
525	224.188	179.35	92.3655	124.424	56.2263	61.0016
526	224.938	179.95	92.6745	124.841	56.4145	61.2056
527	224.188	179.35	92.3655	124.424	56.2263	61.0016
528	224.688	179.75	92.5715	124.702	56.3518	61.1376
529	223.563	178.85	92.108	124.077	56.0696	60.8315
530	223.25	178.6	91.979	123.904	55.9911	60.7463
531	223.75	179	92.185	124.181	56.1165	60.8824
532	224	179.2	92.288	124.32	56.1792	60.9504
533	222.938	178.35	91.8505	123.731	55.9128	60.6614
534	224	179.2	92.288	124.32	56.1792	60.9504
535	223.188	178.55	91.9535	123.869	55.9755	60.7294
536	223.469	178.775	92.0692	124.025	56.046	60.8059
537	223.313	178.65	92.005	123.939	56.0069	60.7635
538	223.375	178.7	92.0305	123.973	56.0224	60.7803
539	222.688	178.15	91.7475	123.592	55.8501	60.5934
540	221.563	177.25	91.284	122.967	55.568	60.2873
541	221.813	177.45	91.387	123.106	55.6307	60.3553
542	223.125	178.5	91.9275	123.834	55.9597	60.7123
543	221.75	177.4	91.361	123.071	55.6149	60.3382
544	223.438	178.75	92.0565	124.008	56.0382	60.7975
545	222.563	178.05	91.696	123.522	55.8188	60.5594
546	221.125	176.9	91.1035	122.724	55.4582	60.1681
547	219.625	175.7	90.4855	121.892	55.0819	59.76
548	221.063	176.85	91.078	122.69	55.4426	60.1512
549	221.125	176.9	91.1035	122.724	55.4582	60.1681
550	219.938	175.95	90.6145	122.066	55.1604	59.8451
551	218.813	175.05	90.151	121.441	54.8783	59.539
552	218.75	175	90.125	121.406	54.8625	59.5219
553	219.094	175.275	90.2667	121.597	54.9488	59.6155
554	219.375	175.5	90.3825	121.753	55.0192	59.6919
555	219.438	175.55	90.4085	121.788	55.035	59.7091
556	218.938	175.15	90.2025	121.511	54.9096	59.573
557	218.563	174.85	90.048	121.302	54.8156	59.471
558	219.25	175.4	90.331	121.684	54.9879	59.6579
559	219.438	175.55	90.4085	121.788	55.035	59.7091
560	218.25	174.6	89.919	121.129	54.7371	59.3858
561	218	174.4	89.816	120.99	54.6744	59.3178
562	218.172	174.538	89.8869	121.085	54.7175	59.3646
563	218	174.4	89.816	120.99	54.6744	59.3178
564	218.438	174.75	89.9965	121.233	54.7843	59.437
565	217.375	173.9	89.5585	120.643	54.5177	59.1477
566	216.938	173.55	89.3785	120.401	54.4081	59.0288
567	217.063	173.65	89.43	120.47	54.4394	59.0628
568	216.875	173.5	89.3525	120.366	54.3922	59.0117
569	216	172.8	88.992	119.88	54.1728	58.7736
570	218.063	174.45	89.842	121.025	54.6902	59.3349
571	216.375	173.1	89.1465	120.088	54.2668	58.8756
572	217.5	174	89.61	120.713	54.549	59.1818
573	216	172.8	88.992	119.88	54.1728	58.7736
574	217.875	174.3	89.7645	120.921	54.6431	59.2838
575	215.875	172.7	88.9405	119.811	54.1414	58.7396
576	214.875	171.9	88.5285	119.256	53.8907	58.4675
577	215.313	172.25	88.709	119.499	54.0005	58.5867
578	215.5	172.4	88.786	119.603	54.0474	58.6375
579	215	172	88.58	119.325	53.922	58.5015
580	216.625	173.3	89.2495	120.227	54.3295	58.9437
581	214.438	171.55	88.3485	119.013	53.7811	58.3486
582	215.813	172.65	88.915	119.776	54.1259	58.7227
583	214.813	171.85	88.503	119.221	53.8751	58.4506
584	214.375	171.5	88.3225	118.978	53.7653	58.3314
585	214.188	171.35	88.2455	118.874	53.7184	58.2805
586	214.063	171.25	88.194	118.805	53.687	58.2465
587	214	171.2	88.168	118.77	53.6712	58.2294
588	213.781	171.025	88.0778	118.648	53.6163	58.1698
589	213.688	170.95	88.0395	118.597	53.593	58.1445
590	213.375	170.7	87.9105	118.423	53.5144	58.0593
591	214	171.2	88.168	118.77	53.6712	58.2294
592	213.688	170.95	88.0395	118.597	53.593	58.1445
593	213.422	170.738	87.9299	118.449	53.5262	58.0721
594	213.063	170.45	87.782	118.25	53.4362	57.9744
595	212.938	170.35	87.7305	118.181	53.4049	57.9404
596	212.875	170.3	87.7045	118.146	53.389	57.9233
597	213.125	170.5	87.8075	118.284	53.4517	57.9913
598	211.875	169.5	87.2925	117.591	53.1382	57.6512
599	213.125	170.5	87.8075	118.284	53.4517	57.9913
600	212.125	169.7	87.3955	117.729	53.2009	57.7192
601	212.063	169.65	87.37	117.695	53.1854	57.7023
602	211.719	169.375	87.2282	117.504	53.0991	57.6087
603	211.25	169	87.035	117.244	52.9815	57.4811
604	211.438	169.15	87.1125	117.348	53.0286	57.5323
605	211.813	169.45	87.267	117.556	53.1227	57.6343
606	211.813	169.45	87.267	117.556	53.1227	57.6343
607	210.875	168.7	86.8805	117.036	52.8875	57.3791
608	210	168	86.52	116.55	52.668	57.141
609	209.875	167.9	86.4685	116.481	52.6367	57.107
610	210.625	168.5	86.7775	116.897	52.8248	57.3111
611	210.688	168.55	86.8035	116.932	52.8406	57.3282
612	211.125	168.9	86.9835	117.174	52.9502	57.4471
613	209.813	167.85	86.443	116.446	52.6211	57.0901
614	211.125	168.9	86.9835	117.174	52.9502	57.4471
615	210	168	86.52	116.55	52.668	57.141
616	210	168	86.52	116.55	52.668	57.141
617	210.813	168.65	86.855	117.001	52.8719	57.3622
618	209.813	167.85	86.443	116.446	52.6211	57.0901
619	208.313	166.65	85.825	115.614	52.2449	56.682
620	208.188	166.55	85.7735	115.544	52.2135	56.648
621	207.938	166.35	85.6705	115.406	52.1508	56.5799
622	208.688	166.95	85.9795	115.822	52.3389	56.784
623	207.625	166.1	85.5415	115.232	52.0724	56.4948
624	206.875	165.5	85.2325	114.816	51.8843	56.2907
625	208.438	166.75	85.8765	115.683	52.2762	56.716
626	207.813	166.25	85.619	115.336	52.1195	56.5459
627	208.313	166.65	85.825	115.614	52.2449	56.682
628	207.125	165.7	85.3355	114.954	51.947	56.3587
629	206.688	165.35	85.1555	114.712	51.8374	56.2398
630	206.938	165.55	85.2585	114.851	51.9001	56.3078
631	208	166.4	85.696	115.44	52.1664	56.5968
632	208.313	166.65	85.825	115.614	52.2449	56.682
633	206.375	165.1	85.0265	114.538	51.7589	56.1546
634	205.875	164.7	84.8205	114.261	51.6335	56.0186
635	205.5	164.4	84.666	114.052	51.5394	55.9166
636	205.938	164.75	84.8465	114.296	51.6493	56.0357
637	205.25	164.2	84.563	113.914	51.4767	55.8485
638	206.875	165.5	85.2325	114.816	51.8843	56.2907
639	206.375	165.1	85.0265	114.538	51.7589	56.1546
640	206.453	165.162	85.0586	114.581	51.7784	56.1759
641	206.188	164.95	84.9495	114.434	51.712	56.1037
642	206.375	165.1	85.0265	114.538	51.7589	56.1546
643	204.75	163.8	84.357	113.636	51.3513	55.7125
644	205.813	164.65	84.795	114.226	51.6179	56.0017
645	205	164	84.46	113.775	51.414	55.7805
646	204.625	163.7	84.3055	113.567	51.3199	55.6785
647	204.313	163.45	84.177	113.394	51.2417	55.5936
648	205.188	164.15	84.5375	113.879	51.4612	55.8317
649	205.313	164.25	84.589	113.949	51.4925	55.8657
650	205	164	84.46	113.775	51.414	55.7805
651	205	164	84.46	113.775	51.414	55.7805
652	203.875	163.1	83.9965	113.151	51.1319	55.4744
653	203.688	162.95	83.9195	113.047	51.0849	55.4235
654	204	163.2	84.048	113.22	51.1632	55.5084
655	204.125	163.3	84.0995	113.289	51.1945	55.5424
656	204.047	163.238	84.0674	113.246	51.175	55.5212
657	203.938	163.15	84.0225	113.186	51.1476	55.4915
658	203.371	162.697	83.7888	112.871	51.0055	55.3372
659	202.688	162.15	83.5075	112.492	50.8342	55.1514
660	202.813	162.25	83.559	112.561	50.8655	55.1854
661	202.813	162.25	83.559	112.561	50.8655	55.1854
662	202.188	161.75	83.3015	112.214	50.7088	55.0153
663	201.063	160.85	82.838	111.59	50.4266	54.7092
664	201.563	161.25	83.044	111.867	50.552	54.8453
665	202.625	162.1	83.4815	112.457	50.8184	55.1343
666	202.063	161.65	83.25	112.145	50.6774	54.9813
667	202.375	161.9	83.3785	112.318	50.7557	55.0662
668	201.563	161.25	83.044	111.867	50.552	54.8453
669	201.188	160.95	82.8895	111.659	50.4579	54.7433
670	201.875	161.5	83.1725	112.041	50.6302	54.9302
671	201.563	161.25	83.044	111.867	50.552	54.8453
672	200.125	160.1	82.4515	111.069	50.1913	54.454
673	200.813	160.65	82.735	111.451	50.3639	54.6412
674	200	160	82.4	111	50.16	54.42
675	201.5	161.2	83.018	111.832	50.5362	54.8282
676	201.063	160.85	82.838	111.59	50.4266	54.7092
677	198.563	158.85	81.808	110.202	49.7996	54.029
678	200.125	160.1	82.4515	111.069	50.1913	54.454
679	199.188	159.35	82.0655	110.549	49.9564	54.199
680	199.438	159.55	82.1685	110.688	50.0191	54.2671
681	200.25	160.2	82.503	111.139	50.2227	54.488
682	198.438	158.75	81.7565	110.133	49.7683	53.995
683	200.25	160.2	82.503	111.139	50.2227	54.488
684	199.75	159.8	82.297	110.861	50.0973	54.352
685	198.875	159.1	81.9365	110.376	49.8779	54.1139
686	199.438	159.55	82.1685	110.688	50.0191	54.2671
687	199.188	159.35	82.0655	110.549	49.9564	54.199
688	198.828	159.062	81.9171	110.35	49.8661	54.1011
689	198.313	158.65	81.705	110.064	49.7369	53.961
690	198.375	158.7	81.7305	110.098	49.7525	53.9778
691	197.875	158.3	81.5245	109.821	49.627	53.8418
692	198	158.4	81.576	109.89	49.6584	53.8758
693	198.125	158.5	81.6275	109.959	49.6897	53.9098
694	197.625	158.1	81.4215	109.682	49.5643	53.7738
695	199.563	159.65	82.22	110.757	50.0504	54.3011
696	198.25	158.6	81.679	110.029	49.7211	53.9438
697	196.625	157.3	81.0095	109.127	49.3135	53.5017
698	197.375	157.9	81.3185	109.543	49.5016	53.7057
699	197.313	157.85	81.293	109.509	49.4861	53.6889
700	197.5	158	81.37	109.612	49.533	53.7398
701	197.375	157.9	81.3185	109.543	49.5016	53.7057
702	196.813	157.45	81.087	109.231	49.3607	53.5528
703	196.563	157.25	80.984	109.092	49.298	53.4848
704	195.813	156.65	80.675	108.676	49.1099	53.2807
705	197.625	158.1	81.4215	109.682	49.5643	53.7738
706	196.938	157.55	81.1385	109.301	49.392	53.5868
707	196.313	157.05	80.881	108.954	49.2353	53.4168
708	196.688	157.35	81.0355	109.162	49.3293	53.5188
709	196.484	157.187	80.9514	109.049	49.2782	53.4633
710	196.438	157.15	80.9325	109.023	49.2666	53.4508
711	196.5	157.2	80.958	109.058	49.2822	53.4676
712	195.875	156.7	80.7005	108.711	49.1255	53.2976
713	195.188	156.15	80.4175	108.329	48.9532	53.1106
714	194.75	155.8	80.237	108.086	48.8433	52.9915
715	194.875	155.9	80.2885	108.156	48.8747	53.0255
716	194.813	155.85	80.263	108.121	48.8591	53.0086
717	195.563	156.45	80.572	108.537	49.0472	53.2127
718	195.938	156.75	80.7265	108.746	49.1412	53.3147
719	194.813	155.85	80.263	108.121	48.8591	53.0086
720	195.813	156.65	80.675	108.676	49.1099	53.2807
721	196.25	157	80.855	108.919	49.2195	53.3996
722	194.438	155.55	80.1085	107.913	48.7651	52.9066
723	193.75	155	79.825	107.531	48.5925	52.7194
724	194.438	155.55	80.1085	107.913	48.7651	52.9066
725	193.875	155.1	79.8765	107.601	48.6238	52.7534
726	193.063	154.45	79.542	107.15	48.4202	52.5324
727	193.75	155	79.825	107.531	48.5925	52.7194
728	193.188	154.55	79.5935	107.219	48.4515	52.5665
729	193.188	154.55	79.5935	107.219	48.4515	52.5665
730	193.938	155.15	79.9025	107.636	48.6397	52.7705
731	194.188	155.35	80.0055	107.774	48.7024	52.8385
732	192.375	153.9	79.2585	106.768	48.2477	52.3452
733	192.063	153.65	79.13	106.595	48.1694	52.2603
734	191.688	153.35	78.9755	106.387	48.0754	52.1583
735	191.625	153.3	78.9495	106.352	48.0596	52.1412
736	192	153.6	79.104	106.56	48.1536	52.2432
737	192.188	153.75	79.1815	106.664	48.2007	52.2944
738	192.188	153.75	79.1815	106.664	48.2007	52.2944
739	191.625	153.3	78.9495	106.352	48.0596	52.1412
740	191.375	153.1	78.8465	106.213	47.9969	52.0731
741	192.75	154.2	79.413	106.976	48.3417	52.4473
742	191.813	153.45	79.027	106.456	48.1067	52.1923
743	192.938	154.35	79.4905	107.081	48.3888	52.4984
744	192.438	153.95	79.2845	106.803	48.2634	52.3624
745	191.813	153.45	79.027	106.456	48.1067	52.1923
746	191.313	153.05	78.821	106.179	47.9813	52.0563
747	191.063	152.85	78.718	106.04	47.9186	51.9882
748	191.25	153	78.795	106.144	47.9655	52.0391
749	190.5	152.4	78.486	105.728	47.7774	51.8351
750	191.563	153.25	78.924	106.317	48.044	52.1243
751	191.063	152.85	78.718	106.04	47.9186	51.9882
752	190.938	152.75	78.6665	105.971	47.8873	51.9542
753	190.938	152.75	78.6665	105.971	47.8873	51.9542
754	191	152.8	78.692	106.005	47.9028	51.9711
755	190.75	152.6	78.589	105.866	47.8401	51.9031
756	189.938	151.95	78.2545	105.416	47.6365	51.6821
757	190	152	78.28	105.45	47.652	51.699
758	189.063	151.25	77.894	104.93	47.417	51.444
759	190.813	152.65	78.615	105.901	47.8559	51.9202
760	189.063	151.25	77.894	104.93	47.417	51.444
761	189.438	151.55	78.0485	105.138	47.511	51.5461
762	190	152	78.28	105.45	47.652	51.699
763	189.5	151.6	78.074	105.172	47.5266	51.563
764	189.313	151.45	77.997	105.069	47.4797	51.5121
765	189.25	151.4	77.971	105.034	47.4639	51.4949
766	189.094	151.275	77.9067	104.947	47.4248	51.4525
767	188.875	151.1	77.8165	104.826	47.3698	51.3929
768	188.938	151.15	77.8425	104.861	47.3856	51.41
769	189.438	151.55	78.0485	105.138	47.511	51.5461
770	188.688	150.95	77.7395	104.722	47.3229	51.342
771	187.563	150.05	77.276	104.097	47.0408	51.0359
772	187.563	150.05	77.276	104.097	47.0408	51.0359
773	187.781	150.225	77.3658	104.218	47.0955	51.0952
774	187.938	150.35	77.4305	104.306	47.1349	51.1379
775	188.063	150.45	77.482	104.375	47.1662	51.1719
776	187.563	150.05	77.276	104.097	47.0408	51.0359
777	187.125	149.7	77.0955	103.854	46.931	50.9167
778	186.813	149.45	76.967	103.681	46.8527	50.8318
779	187.75	150.2	77.353	104.201	47.0877	51.0868
780	187.375	149.9	77.1985	103.993	46.9937	50.9847
781	186.438	149.15	76.8125	103.473	46.7587	50.7298
782	186.938	149.55	77.0185	103.751	46.8841	50.8658
783	186.844	149.475	76.9797	103.698	46.8605	50.8402
784	187	149.6	77.044	103.785	46.8996	50.8827
785	187	149.6	77.044	103.785	46.8996	50.8827
786	186.828	149.462	76.9731	103.69	46.8565	50.8359
787	186.438	149.15	76.8125	103.473	46.7587	50.7298
788	186.875	149.5	76.9925	103.716	46.8683	50.8487
789	185.875	148.7	76.5805	103.161	46.6174	50.5766
790	185.984	148.787	76.6254	103.221	46.6448	50.6063
791	185.625	148.5	76.4775	103.022	46.5547	50.5086
792	185.563	148.45	76.452	102.987	46.5392	50.4917
793	186.438	149.15	76.8125	103.473	46.7587	50.7298
794	184.5	147.6	76.014	102.397	46.2726	50.2024
795	185.563	148.45	76.452	102.987	46.5392	50.4917
796	185.75	148.6	76.529	103.091	46.5861	50.5426
797	185.625	148.5	76.4775	103.022	46.5547	50.5086
798	186.188	148.95	76.7095	103.334	46.696	50.6617
799	186	148.8	76.632	103.23	46.6488	50.6106
800	185.344	148.275	76.3617	102.866	46.4843	50.4321
801	184.5	147.6	76.014	102.397	46.2726	50.2024
802	184.688	147.75	76.0915	102.502	46.3197	50.2536
803	184.5	147.6	76.014	102.397	46.2726	50.2024
804	183.875	147.1	75.7565	102.051	46.1159	50.0324
805	184.375	147.5	75.9625	102.328	46.2413	50.1684
806	184.813	147.85	76.143	102.571	46.3511	50.2876
807	184.031	147.225	75.8208	102.137	46.155	50.0748
808	183.438	146.75	75.5765	101.808	46.0063	49.9135
809	183.5	146.8	75.602	101.843	46.0218	49.9303
810	183.25	146.6	75.499	101.704	45.9591	49.8623
811	183.594	146.875	75.6407	101.895	46.0454	49.9559
812	183.75	147	75.705	101.981	46.0845	49.9984
813	183.875	147.1	75.7565	102.051	46.1159	50.0324
814	183.563	146.85	75.628	101.877	46.0376	49.9475
815	183.375	146.7	75.5505	101.773	45.9905	49.8963
816	182.875	146.3	75.3445	101.496	45.865	49.7603
817	182.188	145.75	75.0615	101.114	45.6927	49.5733
818	183.5	146.8	75.602	101.843	46.0218	49.9303
819	182.688	146.15	75.2675	101.392	45.8182	49.7094
820	182.25	145.8	75.087	101.149	45.7083	49.5902
821	181.813	145.45	74.907	100.906	45.5987	49.4713
822	181.938	145.55	74.9585	100.976	45.63	49.5053
823	181.813	145.45	74.907	100.906	45.5987	49.4713
824	181.75	145.4	74.881	100.871	45.5829	49.4542
825	181.75	145.4	74.881	100.871	45.5829	49.4542
826	181.813	145.45	74.907	100.906	45.5987	49.4713
827	181	144.8	74.572	100.455	45.3948	49.2501
828	181.813	145.45	74.907	100.906	45.5987	49.4713
829	181	144.8	74.572	100.455	45.3948	49.2501
830	181	144.8	74.572	100.455	45.3948	49.2501
831	181.313	145.05	74.701	100.629	45.4733	49.3353
832	181.063	144.85	74.598	100.49	45.4106	49.2672
833	180.563	144.45	74.392	100.212	45.2852	49.1312
834	181.563	145.25	74.804	100.767	45.536	49.4033
835	182.063	145.65	75.01	101.045	45.6614	49.5393
836	180.313	144.25	74.289	100.074	45.2225	49.0632
837	182	145.6	74.984	101.01	45.6456	49.5222
838	179.875	143.9	74.1085	99.8306	45.1127	48.944
839	180.688	144.55	74.4435	100.282	45.3165	49.1652
840	180.938	144.75	74.5465	100.421	45.3792	49.2332
841	179.875	143.9	74.1085	99.8306	45.1127	48.944
842	178.875	143.1	73.6965	99.2756	44.8618	48.6719
843	179.938	143.95	74.1345	99.8656	45.1285	48.9611
844	179.688	143.75	74.0315	99.7268	45.0658	48.8931
845	179.375	143.5	73.9025	99.5531	44.9873	48.8079
846	180	144	74.16	99.9	45.144	48.978
847	180.75	144.6	74.469	100.316	45.3321	49.1821
848	180.313	144.25	74.289	100.074	45.2225	49.0632
849	180	144	74.16	99.9	45.144	48.978
850	180.313	144.25	74.289	100.074	45.2225	49.0632
851	180.125	144.1	74.2115	99.9694	45.1754	49.012
852	179	143.2	73.748	99.345	44.8932	48.7059
853	178.75	143	73.645	99.2062	44.8305	48.6379
854	179	143.2	73.748	99.345	44.8932	48.7059
855	178.734	142.987	73.6384	99.1974	44.8265	48.6335
856	178.625	142.9	73.5935	99.1369	44.7991	48.6039
857	178.563	142.85	73.568	99.1025	44.7836	48.587
858	178.469	142.775	73.5292	99.0503	44.76	48.5614
859	178.563	142.85	73.568	99.1025	44.7836	48.587
860	178.125	142.5	73.3875	98.8594	44.6737	48.4678
861	177.25	141.8	73.027	98.3738	44.4543	48.2297
862	178.625	142.9	73.5935	99.1369	44.7991	48.6039
863	177	141.6	72.924	98.235	44.3916	48.1617
864	178.375	142.7	73.4905	98.9981	44.7364	48.5358
865	178.125	142.5	73.3875	98.8594	44.6737	48.4678
866	178.938	143.15	73.7225	99.3106	44.8777	48.689
867	178.438	142.75	73.5165	99.0331	44.7522	48.553
868	177.375	141.9	73.0785	98.4431	44.4856	48.2637
869	177.375	141.9	73.0785	98.4431	44.4856	48.2637
870	177.25	141.8	73.027	98.3738	44.4543	48.2297
871	176.813	141.45	72.847	98.1312	44.3447	48.1108
872	176.578	141.262	72.7501	98.0008	44.2858	48.0469
873	176.125	140.9	72.5635	97.7494	44.1722	47.9236
874	176.125	140.9	72.5635	97.7494	44.1722	47.9236
875	176.438	141.15	72.6925	97.9231	44.2507	48.0088
876	175.75	140.6	72.409	97.5413	44.0781	47.8216
877	175.813	140.65	72.435	97.5762	44.0939	47.8387
878	175.766	140.613	72.4156	97.5501	44.0821	47.8259
879	175.688	140.55	72.3835	97.5068	44.0626	47.8047
880	175.813	140.65	72.435	97.5762	44.0939	47.8387
881	176	140.8	72.512	97.68	44.1408	47.8896
882	176.688	141.35	72.7955	98.0618	44.3133	48.0768
883	175	140	72.1	97.125	43.89	47.6175
884	175.563	140.45	72.332	97.4375	44.0312	47.7707
885	174.188	139.35	71.7655	96.6743	43.6863	47.3965
886	175.25	140.2	72.203	97.2638	43.9527	47.6855
887	176	140.8	72.512	97.68	44.1408	47.8896
888	175.688	140.55	72.3835	97.5068	44.0626	47.8047
889	175.375	140.3	72.2545	97.3331	43.9841	47.7195
890	174.875	139.9	72.0485	97.0556	43.8586	47.5835
891	175.375	140.3	72.2545	97.3331	43.9841	47.7195
892	174.563	139.65	71.92	96.8825	43.7804	47.4986
893	175.625	140.5	72.3575	97.4719	44.0468	47.7876
894	174.813	139.85	72.023	97.0212	43.8431	47.5666
895	173.813	139.05	71.611	96.4662	43.5923	47.2945
896	174.313	139.45	71.817	96.7437	43.7177	47.4306
897	173.75	139	71.585	96.4313	43.5765	47.2774
898	173.563	138.85	71.508	96.3275	43.5296	47.2265
899	174.688	139.75	71.9715	96.9518	43.8118	47.5326
900	174.875	139.9	72.0485	97.0556	43.8586	47.5835
901	174.438	139.55	71.8685	96.8131	43.749	47.4646
902	173.875	139.1	71.6365	96.5006	43.6078	47.3114
903	174.938	139.95	72.0745	97.0906	43.8745	47.6006
904	173.25	138.6	71.379	96.1538	43.4511	47.1413
905	174	139.2	71.688	96.57	43.6392	47.3454
906	173.563	138.85	71.508	96.3275	43.5296	47.2265
907	174.125	139.3	71.7395	96.6394	43.6705	47.3794
908	173.688	138.95	71.5595	96.3968	43.5609	47.2605
909	173.375	138.7	71.4305	96.2231	43.4825	47.1753
910	174.313	139.45	71.817	96.7437	43.7177	47.4306
911	171.75	137.4	70.761	95.3213	43.0749	46.7332
912	172.75	138.2	71.173	95.8762	43.3257	47.0053
913	173.688	138.95	71.5595	96.3968	43.5609	47.2605
914	174.563	139.65	71.92	96.8825	43.7804	47.4986
915	173.063	138.45	71.302	96.05	43.4042	47.0904
916	172.625	138.1	71.1215	95.8069	43.2944	46.9713
917	172.75	138.2	71.173	95.8762	43.3257	47.0053
918	173.063	138.45	71.302	96.05	43.4042	47.0904
919	172.313	137.85	70.993	95.6337	43.2161	46.8864
920	171.938	137.55	70.8385	95.4256	43.1221	46.7843
921	172.625	138.1	71.1215	95.8069	43.2944	46.9713
922	172.625	138.1	71.1215	95.8069	43.2944	46.9713
923	172	137.6	70.864	95.46	43.1376	46.8012
924	173.25	138.6	71.379	96.1538	43.4511	47.1413
925	171.125	136.9	70.5035	94.9744	42.9181	46.5631
926	172.25	137.8	70.967	95.5987	43.2003	46.8692
927	171.813	137.45	70.787	95.3562	43.0907	46.7503
928	172	137.6	70.864	95.46	43.1376	46.8012
929	171.5	137.2	70.658	95.1825	43.0122	46.6651
930	171.188	136.95	70.5295	95.0093	42.934	46.5802
931	170.813	136.65	70.375	94.8012	42.8399	46.4782
932	171.563	137.25	70.684	95.2175	43.028	46.6823
933	169.563	135.65	69.86	94.1075	42.5264	46.1381
934	172.25	137.8	70.967	95.5987	43.2003	46.8692
935	170	136	70.04	94.35	42.636	46.257
936	170.5	136.4	70.246	94.6275	42.7614	46.3931
937	170.656	136.525	70.3103	94.7141	42.8005	46.4355
938	170.813	136.65	70.375	94.8012	42.8399	46.4782
939	171.313	137.05	70.581	95.0787	42.9653	46.6143
940	172.313	137.85	70.993	95.6337	43.2161	46.8864
941	169.938	135.95	70.0145	94.3156	42.6204	46.2401
942	170.938	136.75	70.4265	94.8706	42.8713	46.5122
943	170.5	136.4	70.246	94.6275	42.7614	46.3931
944	171.125	136.9	70.5035	94.9744	42.9181	46.5631
945	170.75	136.6	70.349	94.7662	42.8241	46.4611
946	169.813	135.85	69.963	94.2462	42.5891	46.2061
947	169.625	135.7	69.8855	94.1419	42.5419	46.155
948	169.719	135.775	69.9242	94.1941	42.5655	46.1805
949	169.875	135.9	69.9885	94.2806	42.6046	46.223
950	169.563	135.65	69.86	94.1075	42.5264	46.1381
951	168.563	134.85	69.448	93.5525	42.2756	45.866
952	167.688	134.15	69.0875	93.0668	42.0562	45.6279
953	169.5	135.6	69.834	94.0725	42.5106	46.121
954	168.938	135.15	69.6025	93.7606	42.3697	45.968
955	168.938	135.15	69.6025	93.7606	42.3697	45.968
956	168.688	134.95	69.4995	93.6218	42.307	45.9
957	168.625	134.9	69.4735	93.5869	42.2912	45.8829
958	169.875	135.9	69.9885	94.2806	42.6046	46.223
959	168.875	135.1	69.5765	93.7256	42.3539	45.9509
960	169.563	135.65	69.86	94.1075	42.5264	46.1381
961	168.813	135.05	69.551	93.6912	42.3383	45.934
962	168.25	134.6	69.319	93.3787	42.1971	45.7808
963	168.75	135	69.525	93.6562	42.3225	45.9169
964	168	134.4	69.216	93.24	42.1344	45.7128
965	168.25	134.6	69.319	93.3787	42.1971	45.7808
966	167.938	134.35	69.1905	93.2056	42.1189	45.6959
967	167.969	134.375	69.2032	93.2228	42.1266	45.7044
968	167.875	134.3	69.1645	93.1706	42.1031	45.6788
969	167.813	134.25	69.139	93.1362	42.0875	45.6619
970	167.5	134	69.01	92.9625	42.009	45.5767
971	165.813	132.65	68.315	92.0262	41.5859	45.1177
972	166.75	133.4	68.701	92.5463	41.8209	45.3727
973	168.688	134.95	69.4995	93.6218	42.307	45.9
974	166.938	133.55	68.7785	92.6506	41.868	45.4238
975	166.188	132.95	68.4695	92.2343	41.6799	45.2197
976	167	133.6	68.804	92.685	41.8836	45.4407
977	166.813	133.45	68.727	92.5812	41.8367	45.3898
978	167.313	133.85	68.933	92.8587	41.9621	45.5259
979	166.563	133.25	68.624	92.4425	41.774	45.3218
980	166.063	132.85	68.418	92.165	41.6486	45.1857
981	166.813	133.45	68.727	92.5812	41.8367	45.3898
982	166.938	133.55	68.7785	92.6506	41.868	45.4238
983	166.891	133.513	68.7591	92.6245	41.8563	45.411
984	166.563	133.25	68.624	92.4425	41.774	45.3218
985	167.25	133.8	68.907	92.8238	41.9463	45.5087
986	166.438	133.15	68.5725	92.3731	41.7426	45.2878
987	166.25	133	68.495	92.2687	41.6955	45.2366
988	166.25	133	68.495	92.2687	41.6955	45.2366
989	165.828	132.662	68.3211	92.0345	41.5897	45.1218
990	165.25	132.2	68.083	91.7138	41.4447	44.9645
991	165.563	132.45	68.212	91.8875	41.5232	45.0497
992	165.813	132.65	68.315	92.0262	41.5859	45.1177
993	165.063	132.05	68.006	91.61	41.3978	44.9136
994	165.125	132.1	68.0315	91.6444	41.4134	44.9305
995	165.438	132.35	68.1605	91.8181	41.4918	45.0157
996	165.25	132.2	68.083	91.7138	41.4447	44.9645
997	164.75	131.8	67.877	91.4363	41.3193	44.8285
998	165.063	132.05	68.006	91.61	41.3978	44.9136
999	164.438	131.55	67.7485	91.2631	41.2411	44.7436
1000	165.563	132.45	68.212	91.8875	41.5232	45.0497
1001	164.313	131.45	67.697	91.1937	41.2097	44.7096
1002	165.313	132.25	68.109	91.7487	41.4605	44.9817
1003	163.5	130.8	67.362	90.7425	41.0058	44.4883
1004	164.625	131.7	67.8255	91.3669	41.288	44.7945
1005	164.563	131.65	67.8	91.3325	41.2724	44.7776
1006	163.375	130.7	67.3105	90.6731	40.9744	44.4543
1007	165.25	132.2	68.083	91.7138	41.4447	44.9645
1008	163.125	130.5	67.2075	90.5344	40.9117	44.3863
1009	164.438	131.55	67.7485	91.2631	41.2411	44.7436
1010	163.813	131.05	67.491	90.9162	41.0843	44.5735
1011	164	131.2	67.568	91.02	41.1312	44.6244
1012	164.313	131.45	67.697	91.1937	41.2097	44.7096
1013	163.625	130.9	67.4135	90.8119	41.0371	44.5224
1014	162.063	129.65	66.77	89.945	40.6454	44.0973
1015	164.25	131.4	67.671	91.1587	41.1939	44.6924
1016	163.625	130.9	67.4135	90.8119	41.0371	44.5224
1017	164.063	131.25	67.594	91.055	41.147	44.6415
1018	163.625	130.9	67.4135	90.8119	41.0371	44.5224
1019	163.75	131	67.465	90.8812	41.0685	44.5564
1020	163.625	130.9	67.4135	90.8119	41.0371	44.5224
1021	162.625	130.1	67.0015	90.2569	40.7863	44.2503
1022	163.875	131.1	67.5165	90.9506	41.0999	44.5904
1023	161.875	129.5	66.6925	89.8406	40.5983	44.0462
1024	162.938	130.35	67.1305	90.4306	40.8648	44.3354
1025	161.75	129.4	66.641	89.7712	40.5669	44.0122
1026	161.75	129.4	66.641	89.7712	40.5669	44.0122
1027	162.313	129.85	66.873	90.0837	40.7081	44.1654
1028	163	130.4	67.156	90.465	40.8804	44.3523
1029	161.75	129.4	66.641	89.7712	40.5669	44.0122
1030	162.188	129.75	66.8215	90.0143	40.6767	44.1313
1031	161	128.8	66.332	89.355	40.3788	43.8081
1032	163.125	130.5	67.2075	90.5344	40.9117	44.3863
1033	161.75	129.4	66.641	89.7712	40.5669	44.0122
1034	162.188	129.75	66.8215	90.0143	40.6767	44.1313
1035	161.813	129.45	66.667	89.8062	40.5827	44.0293
1036	161.625	129.3	66.5895	89.7019	40.5356	43.9782
1037	162.563	130.05	66.976	90.2225	40.7708	44.2334
1038	162.75	130.2	67.053	90.3263	40.8177	44.2843
1039	161.063	128.85	66.358	89.39	40.3946	43.8252
1040	160.875	128.7	66.2805	89.2856	40.3475	43.7741
1041	161.078	128.862	66.3641	89.3983	40.3984	43.8293
1042	161.375	129.1	66.4865	89.5631	40.4729	43.9101
1043	161	128.8	66.332	89.355	40.3788	43.8081
1044	161.813	129.45	66.667	89.8062	40.5827	44.0293
1045	162	129.6	66.744	89.91	40.6296	44.0802
1046	161.563	129.25	66.564	89.6675	40.52	43.9613
1047	161.25	129	66.435	89.4938	40.4415	43.8761
1048	159.813	127.85	65.843	88.6962	40.0811	43.4851
1049	160.063	128.05	65.946	88.835	40.1438	43.5531
1050	160.094	128.075	65.9587	88.8522	40.1516	43.5616
1051	160.5	128.4	66.126	89.0775	40.2534	43.672
1052	160	128	65.92	88.8	40.128	43.536
1053	160.813	128.65	66.255	89.2512	40.3319	43.7572
1054	161.25	129	66.435	89.4938	40.4415	43.8761
1055	159.625	127.7	65.7655	88.5919	40.0339	43.434
1056	161.5	129.2	66.538	89.6325	40.5042	43.9442
1057	159.938	127.95	65.8945	88.7656	40.1125	43.5191
1058	160.813	128.65	66.255	89.2512	40.3319	43.7572
1059	160.125	128.1	65.9715	88.8694	40.1594	43.57
1060	160.188	128.15	65.9975	88.9043	40.1752	43.5872
1061	160.063	128.05	65.946	88.835	40.1438	43.5531
1062	160.188	128.15	65.9975	88.9043	40.1752	43.5872
1063	160.25	128.2	66.023	88.9387	40.1907	43.604
1064	159.906	127.925	65.8813	88.7478	40.1044	43.5104
1065	159.813	127.85	65.843	88.6962	40.0811	43.4851
1066	159.375	127.5	65.6625	88.4531	39.9712	43.3659
1067	158.688	126.95	65.3795	88.0718	39.7989	43.179
1068	158.875	127.1	65.4565	88.1756	39.8458	43.2299
1069	159.125	127.3	65.5595	88.3144	39.9085	43.2979
1070	159.438	127.55	65.6885	88.4881	39.9871	43.3831
1071	159.5	127.6	65.714	88.5225	40.0026	43.3999
1072	159.25	127.4	65.611	88.3838	39.9399	43.3319
1073	158.75	127	65.405	88.1063	39.8145	43.1959
1074	159.313	127.45	65.637	88.4187	39.9557	43.3491
1075	160.25	128.2	66.023	88.9387	40.1907	43.604
1076	159.438	127.55	65.6885	88.4881	39.9871	43.3831
1077	159.125	127.3	65.5595	88.3144	39.9085	43.2979
1078	158	126.4	65.096	87.69	39.6264	42.9918
1079	160.313	128.25	66.049	88.9737	40.2065	43.6212
1080	158.563	126.85	65.328	88.0025	39.7676	43.145
1081	157.938	126.35	65.0705	87.6556	39.6108	42.9749
1082	158.563	126.85	65.328	88.0025	39.7676	43.145
1083	157.563	126.05	64.916	87.4475	39.5168	42.8729
1084	157.688	126.15	64.9675	87.5168	39.5481	42.9069
1085	157.859	126.287	65.0379	87.6118	39.591	42.9534
1086	158.063	126.45	65.122	87.725	39.6422	43.0089
1087	158.125	126.5	65.1475	87.7594	39.6578	43.0258
1088	157.563	126.05	64.916	87.4475	39.5168	42.8729
1089	158.25	126.6	65.199	87.8287	39.6891	43.0598
1090	158.813	127.05	65.431	88.1412	39.8303	43.213
1091	158.563	126.85	65.328	88.0025	39.7676	43.145
1092	158.094	126.475	65.1347	87.7422	39.65	43.0174
1093	157.313	125.85	64.813	87.3087	39.4541	42.8049
1094	157.688	126.15	64.9675	87.5168	39.5481	42.9069
1095	157.75	126.2	64.993	87.5512	39.5637	42.9238
1096	157.688	126.15	64.9675	87.5168	39.5481	42.9069
1097	157.625	126.1	64.9415	87.4819	39.5324	42.8898
1098	156.375	125.1	64.4265	86.7881	39.2189	42.5496
1099	156.313	125.05	64.401	86.7537	39.2033	42.5328
1100	156.578	125.262	64.5101	86.9008	39.2698	42.6049
1101	156.875	125.5	64.6325	87.0656	39.3443	42.6857
1102	156.75	125.4	64.581	86.9963	39.3129	42.6517
1103	156.75	125.4	64.581	86.9963	39.3129	42.6517
1104	156.25	125	64.375	86.7188	39.1875	42.5156
1105	156.484	125.187	64.4714	86.8486	39.2462	42.5793
1106	156.625	125.3	64.5295	86.9269	39.2816	42.6177
1107	156.313	125.05	64.401	86.7537	39.2033	42.5328
1108	157.688	126.15	64.9675	87.5168	39.5481	42.9069
1109	155.688	124.55	64.1435	86.4068	39.0466	42.3627
1110	156.563	125.25	64.504	86.8925	39.266	42.6008
1111	156.625	125.3	64.5295	86.9269	39.2816	42.6177
1112	156.938	125.55	64.6585	87.1006	39.3601	42.7028
1113	156.391	125.113	64.4331	86.797	39.2229	42.554
1114	155.875	124.7	64.2205	86.5106	39.0934	42.4136
1115	156.125	124.9	64.3235	86.6494	39.1561	42.4816
1116	155.75	124.6	64.169	86.4412	39.0621	42.3796
1117	156.188	124.95	64.3495	86.6843	39.172	42.4988
1118	156.375	125.1	64.4265	86.7881	39.2189	42.5496
1119	156.813	125.45	64.607	87.0312	39.3287	42.6688
1120	157	125.6	64.684	87.135	39.3756	42.7197
1121	154.25	123.4	63.551	85.6088	38.6859	41.9714
1122	156.25	125	64.375	86.7188	39.1875	42.5156
1123	154.438	123.55	63.6285	85.7131	38.733	42.0226
1124	154.188	123.35	63.5255	85.5743	38.6703	41.9545
1125	156.313	125.05	64.401	86.7537	39.2033	42.5328
1126	155.688	124.55	64.1435	86.4068	39.0466	42.3627
1127	155.375	124.3	64.0145	86.2331	38.968	42.2775
1128	155	124	63.86	86.025	38.874	42.1755
1129	154.5	123.6	63.654	85.7475	38.7486	42.0395
1130	155.375	124.3	64.0145	86.2331	38.968	42.2775
1131	155.125	124.1	63.9115	86.0944	38.9053	42.2095
1132	155.5	124.4	64.066	86.3025	38.9994	42.3115
1133	154.5	123.6	63.654	85.7475	38.7486	42.0395
1134	155.125	124.1	63.9115	86.0944	38.9053	42.2095
1135	154.313	123.45	63.577	85.6437	38.7017	41.9886
1136	154.75	123.8	63.757	85.8863	38.8113	42.1075
1137	154.938	123.95	63.8345	85.9906	38.8584	42.1586
1138	154.563	123.65	63.68	85.7825	38.7644	42.0566
1139	154.625	123.7	63.7055	85.8169	38.7799	42.0735
1140	152.875	122.3	62.9845	84.8456	38.3411	41.5973
1141	153.875	123.1	63.3965	85.4006	38.5919	41.8694
1142	152.813	122.25	62.959	84.8112	38.3255	41.5804
1143	155.063	124.05	63.886	86.06	38.8898	42.1926
1144	153.813	123.05	63.371	85.3662	38.5763	41.8525
1145	154.688	123.75	63.7315	85.8518	38.7957	42.0906
1146	154.063	123.25	63.474	85.505	38.639	41.9205
1147	154.125	123.3	63.4995	85.5394	38.6546	41.9374
1148	154.063	123.25	63.474	85.505	38.639	41.9205
1149	153.813	123.05	63.371	85.3662	38.5763	41.8525
1150	154.125	123.3	63.4995	85.5394	38.6546	41.9374
1151	153.25	122.6	63.139	85.0537	38.4351	41.6993
1152	152.25	121.8	62.727	84.4988	38.1843	41.4272
1153	152.813	122.25	62.959	84.8112	38.3255	41.5804
1154	152.938	122.35	63.0105	84.8806	38.3569	41.6144
1155	153	122.4	63.036	84.915	38.3724	41.6313
1156	153.188	122.55	63.1135	85.0193	38.4196	41.6825
1157	153.172	122.538	63.1069	85.0105	38.4155	41.6781
1158	152.938	122.35	63.0105	84.8806	38.3569	41.6144
1159	152.543	122.034	62.8477	84.6614	38.2578	41.507
1160	152.125	121.7	62.6755	84.4294	38.1529	41.3932
1161	151.938	121.55	62.5985	84.3256	38.1061	41.3423
1162	152.75	122.2	62.933	84.7763	38.3097	41.5633
1163	151.813	121.45	62.547	84.2562	38.0747	41.3083
1164	152.5	122	62.83	84.6375	38.247	41.4952
1165	151.438	121.15	62.3925	84.0481	37.9806	41.2063
1166	151.938	121.55	62.5985	84.3256	38.1061	41.3423
1167	151.375	121.1	62.3665	84.0131	37.9648	41.1891
1168	151.125	120.9	62.2635	83.8744	37.9021	41.1211
1169	151	120.8	62.212	83.805	37.8708	41.0871
1170	152.625	122.1	62.8815	84.7069	38.2784	41.5293
1171	151.625	121.3	62.4695	84.1519	38.0275	41.2572
1172	150.75	120.6	62.109	83.6663	37.8081	41.0191
1173	152	121.6	62.624	84.36	38.1216	41.3592
1174	152.625	122.1	62.8815	84.7069	38.2784	41.5293
1175	150	120	61.8	83.25	37.62	40.815
1176	152.188	121.75	62.7015	84.4643	38.1688	41.4104
1177	150.563	120.45	62.032	83.5625	37.7612	40.9682
1178	151.625	121.3	62.4695	84.1519	38.0275	41.2572
1179	151.875	121.5	62.5725	84.2906	38.0902	41.3252
1180	151.234	120.987	62.3084	83.9349	37.9295	41.1508
1181	150.875	120.7	62.1605	83.7356	37.8394	41.0531
1182	150.563	120.45	62.032	83.5625	37.7612	40.9682
1183	150.891	120.713	62.1671	83.7445	37.8435	41.0574
1184	151	120.8	62.212	83.805	37.8708	41.0871
1185	151.125	120.9	62.2635	83.8744	37.9021	41.1211
1186	149.938	119.95	61.7745	83.2156	37.6044	40.7981
1187	150.313	120.25	61.929	83.4237	37.6985	40.9002
1188	149.25	119.4	61.491	82.8337	37.4319	40.6109
1189	150.75	120.6	62.109	83.6663	37.8081	41.0191
1190	149.563	119.65	61.62	83.0075	37.5104	40.6961
1191	150.5	120.4	62.006	83.5275	37.7454	40.9511
1192	149.688	119.75	61.6715	83.0768	37.5418	40.7301
1193	150.5	120.4	62.006	83.5275	37.7454	40.9511
1194	151.125	120.9	62.2635	83.8744	37.9021	41.1211
1195	150.375	120.3	61.9545	83.4581	37.7141	40.917
1196	150.563	120.45	62.032	83.5625	37.7612	40.9682
1197	150.156	120.125	61.8643	83.3366	37.6591	40.8575
1198	149.875	119.9	61.7485	83.1806	37.5887	40.781
1199	149.813	119.85	61.723	83.1462	37.5731	40.7641
1200	150.625	120.5	62.0575	83.5969	37.7767	40.9851
1201	150.188	120.15	61.8775	83.3543	37.6671	40.8661
1202	149.438	119.55	61.5685	82.9381	37.4791	40.6621
1203	149.938	119.95	61.7745	83.2156	37.6044	40.7981
1204	150.188	120.15	61.8775	83.3543	37.6671	40.8661
1205	149.875	119.9	61.7485	83.1806	37.5887	40.781
1206	149.438	119.55	61.5685	82.9381	37.4791	40.6621
1207	150.25	120.2	61.903	83.3888	37.6827	40.883
1208	149	119.2	61.388	82.695	37.3692	40.5429
1209	148.313	118.65	61.105	82.3137	37.1969	40.356
1210	149.438	119.55	61.5685	82.9381	37.4791	40.6621
1211	148.5	118.8	61.182	82.4175	37.2438	40.4068
1212	148.125	118.5	61.0275	82.2094	37.1497	40.3048
1213	148.563	118.85	61.208	82.4525	37.2596	40.424
1214	148.688	118.95	61.2595	82.5218	37.291	40.458
1215	148.938	119.15	61.3625	82.6606	37.3537	40.526
1216	148.938	119.15	61.3625	82.6606	37.3537	40.526
1217	149.141	119.313	61.4461	82.7733	37.4046	40.5813
1218	149.438	119.55	61.5685	82.9381	37.4791	40.6621
1219	149.25	119.4	61.491	82.8337	37.4319	40.6109
1220	149.188	119.35	61.4655	82.7993	37.4164	40.5941
1221	148.063	118.45	61.002	82.175	37.1342	40.2879
1222	148.188	118.55	61.0535	82.2443	37.1656	40.322
1223	147.063	117.65	60.59	81.62	36.8834	40.0158
1224	148.25	118.6	61.079	82.2788	37.1811	40.3388
1225	147.188	117.75	60.6415	81.6893	36.9147	40.0498
1226	147.813	118.25	60.899	82.0362	37.0715	40.2199
1227	147.625	118.1	60.8215	81.9319	37.0243	40.1688
1228	148.5	118.8	61.182	82.4175	37.2438	40.4068
1229	148.688	118.95	61.2595	82.5218	37.291	40.458
1230	147.75	118.2	60.873	82.0012	37.0557	40.2028
1231	147.188	117.75	60.6415	81.6893	36.9147	40.0498
1232	147.625	118.1	60.8215	81.9319	37.0243	40.1688
1233	148.313	118.65	61.105	82.3137	37.1969	40.356
1234	147.875	118.3	60.9245	82.0706	37.087	40.2368
1235	148.375	118.7	61.1305	82.3481	37.2124	40.3728
1236	147.188	117.75	60.6415	81.6893	36.9147	40.0498
1237	145.938	116.75	60.1265	80.9956	36.6013	39.7097
1238	146.563	117.25	60.384	81.3425	36.758	39.8798
1239	147.25	117.8	60.667	81.7237	36.9303	40.0667
1240	146.5	117.2	60.358	81.3075	36.7422	39.8627
1241	146.125	116.9	60.2035	81.0994	36.6482	39.7606
1242	146.625	117.3	60.4095	81.3769	36.7736	39.8967
1243	147.313	117.85	60.693	81.7587	36.9461	40.0839
1244	147	117.6	60.564	81.585	36.8676	39.9987
1245	146.375	117.1	60.3065	81.2381	36.7109	39.8286
1246	145.813	116.65	60.075	80.9262	36.5699	39.6757
1247	146.391	117.113	60.3131	81.247	36.7149	39.833
1248	146.625	117.3	60.4095	81.3769	36.7736	39.8967
1249	146.75	117.4	60.461	81.4463	36.8049	39.9307
1250	146.813	117.45	60.487	81.4812	36.8207	39.9478
1251	147.063	117.65	60.59	81.62	36.8834	40.0158
1252	146.813	117.45	60.487	81.4812	36.8207	39.9478
1253	145.875	116.7	60.1005	80.9606	36.5855	39.6926
1254	145.188	116.15	59.8175	80.5793	36.4132	39.5057
1255	145.25	116.2	59.843	80.6137	36.4287	39.5225
1256	145.453	116.362	59.9266	80.7264	36.4796	39.5778
1257	145.563	116.45	59.972	80.7875	36.5072	39.6077
1258	145.813	116.65	60.075	80.9262	36.5699	39.6757
1259	146.188	116.95	60.2295	81.1343	36.6639	39.7777
1260	146.469	117.175	60.3452	81.2903	36.7344	39.8542
1261	146.938	117.55	60.5385	81.5506	36.852	39.9818
1262	146.938	117.55	60.5385	81.5506	36.852	39.9818
1263	146.063	116.85	60.178	81.065	36.6326	39.7437
1264	145.688	116.55	60.0235	80.8568	36.5386	39.6417
1265	145.844	116.675	60.0877	80.9434	36.5777	39.6842
1266	145.938	116.75	60.1265	80.9956	36.6013	39.7097
1267	145.688	116.55	60.0235	80.8568	36.5386	39.6417
1268	146.688	117.35	60.4355	81.4118	36.7893	39.9138
1269	146.188	116.95	60.2295	81.1343	36.6639	39.7777
1270	145.5	116.4	59.946	80.7525	36.4914	39.5906
1271	144.438	115.55	59.5085	80.1631	36.2251	39.3016
1272	144.875	115.9	59.6885	80.4056	36.3347	39.4205
1273	144.875	115.9	59.6885	80.4056	36.3347	39.4205
1274	145.688	116.55	60.0235	80.8568	36.5386	39.6417
1275	143.875	115.1	59.2765	79.8506	36.0838	39.1484
1276	142.688	114.15	58.7875	79.1918	35.7861	38.8254
1277	144.125	115.3	59.3795	79.9894	36.1465	39.2164
1278	145.375	116.3	59.8945	80.6831	36.4601	39.5565
1279	145.188	116.15	59.8175	80.5793	36.4132	39.5057
1280	144.813	115.85	59.663	80.3712	36.3191	39.4036
1281	144.813	115.85	59.663	80.3712	36.3191	39.4036
1282	143.938	115.15	59.3025	79.8856	36.0996	39.1655
1283	144.75	115.8	59.637	80.3363	36.3033	39.3865
1284	144.25	115.4	59.431	80.0588	36.1779	39.2504
1285	144.188	115.35	59.4055	80.0243	36.1624	39.2336
1286	144.438	115.55	59.5085	80.1631	36.2251	39.3016
1287	144.375	115.5	59.4825	80.1281	36.2092	39.2844
1288	144.25	115.4	59.431	80.0588	36.1779	39.2504
1289	143.875	115.1	59.2765	79.8506	36.0838	39.1484
1290	143.438	114.75	59.0965	79.6081	35.9742	39.0295
1291	144.063	115.25	59.354	79.955	36.131	39.1995
1292	144.688	115.75	59.6115	80.3018	36.2878	39.3696
1293	144.625	115.7	59.5855	80.2669	36.2719	39.3525
1294	144.422	115.538	59.5019	80.1542	36.221	39.2972
1295	144.313	115.45	59.457	80.0937	36.1937	39.2676
1296	144.063	115.25	59.354	79.955	36.131	39.1995
1297	144.375	115.5	59.4825	80.1281	36.2092	39.2844
1298	144.813	115.85	59.663	80.3712	36.3191	39.4036
1299	144.313	115.45	59.457	80.0937	36.1937	39.2676
1300	144.25	115.4	59.431	80.0588	36.1779	39.2504
1301	143.75	115	59.225	79.7812	36.0525	39.1144
1302	143.188	114.55	58.9935	79.4693	35.9115	38.9614
1303	143.438	114.75	59.0965	79.6081	35.9742	39.0295
1304	143.375	114.7	59.0705	79.5731	35.9584	39.0123
1305	143.75	115	59.225	79.7812	36.0525	39.1144
1306	143.125	114.5	58.9675	79.4344	35.8957	38.9443
1307	142.375	113.9	58.6585	79.0181	35.7077	38.7402
1308	143.438	114.75	59.0965	79.6081	35.9742	39.0295
1309	143.313	114.65	59.045	79.5387	35.9429	38.9955
1310	143.5	114.8	59.122	79.6425	35.9898	39.0463
1311	143.375	114.7	59.0705	79.5731	35.9584	39.0123
1312	144	115.2	59.328	79.92	36.1152	39.1824
1313	142.375	113.9	58.6585	79.0181	35.7077	38.7402
1314	143.063	114.45	58.942	79.4	35.8802	38.9274
1315	142.125	113.7	58.5555	78.8794	35.645	38.6722
1316	142.188	113.75	58.5815	78.9143	35.6608	38.6893
1317	142.688	114.15	58.7875	79.1918	35.7861	38.8254
1318	141	112.8	58.092	78.255	35.3628	38.3661
1319	141.875	113.5	58.4525	78.7406	35.5823	38.6042
1320	142.313	113.85	58.633	78.9837	35.6921	38.7234
1321	142.813	114.25	58.839	79.2612	35.8175	38.8594
1322	141.063	112.85	58.118	78.29	35.3786	38.3832
1323	142.375	113.9	58.6585	79.0181	35.7077	38.7402
1324	141.5	113.2	58.298	78.5325	35.4882	38.5022
1325	141.25	113	58.195	78.3937	35.4255	38.4341
1326	141.547	113.238	58.3174	78.5586	35.5	38.5149
1327	142.25	113.8	58.607	78.9488	35.6763	38.7062
1328	141.188	112.95	58.1695	78.3593	35.41	38.4173
1329	142.313	113.85	58.633	78.9837	35.6921	38.7234
1330	140.875	112.7	58.0405	78.1856	35.3314	38.3321
1331	142.75	114.2	58.813	79.2262	35.8017	38.8423
1332	141	112.8	58.092	78.255	35.3628	38.3661
1333	141.688	113.35	58.3755	78.6368	35.5354	38.5533
1334	141.563	113.25	58.324	78.5675	35.504	38.5193
1335	141.375	113.1	58.2465	78.4631	35.4569	38.4681
1336	141.063	112.85	58.118	78.29	35.3786	38.3832
1337	141	112.8	58.092	78.255	35.3628	38.3661
1338	140.313	112.25	57.809	77.8737	35.1905	38.1792
1339	141.5	113.2	58.298	78.5325	35.4882	38.5022
1340	140.313	112.25	57.809	77.8737	35.1905	38.1792
1341	141.188	112.95	58.1695	78.3593	35.41	38.4173
1342	140.75	112.6	57.989	78.1162	35.3001	38.2981
1343	140.375	112.3	57.8345	77.9081	35.206	38.196
1344	141.5	113.2	58.298	78.5325	35.4882	38.5022
1345	141.688	113.35	58.3755	78.6368	35.5354	38.5533
1346	140.938	112.75	58.0665	78.2206	35.3473	38.3492
1347	140.688	112.55	57.9635	78.0818	35.2846	38.2812
1348	140.531	112.425	57.8988	77.9947	35.2452	38.2385
1349	140.375	112.3	57.8345	77.9081	35.206	38.196
1350	140.125	112.1	57.7315	77.7694	35.1433	38.128
1351	140.609	112.487	57.9309	78.038	35.2647	38.2597
1352	141	112.8	58.092	78.255	35.3628	38.3661
1353	140.938	112.75	58.0665	78.2206	35.3473	38.3492
1354	139.313	111.45	57.397	77.3187	34.9397	37.9071
1355	139.5	111.6	57.474	77.4225	34.9866	37.9579
1356	140.313	112.25	57.809	77.8737	35.1905	38.1792
1357	139.625	111.7	57.5255	77.4919	35.0179	37.992
1358	140.188	112.15	57.7575	77.8043	35.1591	38.1452
1359	139.75	111.8	57.577	77.5613	35.0493	38.026
1360	139.875	111.9	57.6285	77.6306	35.0806	38.06
1361	140	112	57.68	77.7	35.112	38.094
1362	139.984	111.987	57.6734	77.6911	35.108	38.0896
1363	140.188	112.15	57.7575	77.8043	35.1591	38.1452
1364	139.875	111.9	57.6285	77.6306	35.0806	38.06
1365	140.938	112.75	58.0665	78.2206	35.3473	38.3492
1366	140.125	112.1	57.7315	77.7694	35.1433	38.128
1367	139.25	111.4	57.371	77.2837	34.9239	37.8899
1368	140.563	112.45	57.912	78.0125	35.2532	38.2472
1369	138.438	110.75	57.0365	76.8331	34.7203	37.669
1370	139.188	111.35	57.3455	77.2493	34.9083	37.873
1371	139.938	111.95	57.6545	77.6656	35.0964	38.0771
1372	140.125	112.1	57.7315	77.7694	35.1433	38.128
1373	138.75	111	57.165	77.0062	34.7985	37.7539
1374	138.875	111.1	57.2165	77.0756	34.8299	37.7879
1375	138.813	111.05	57.191	77.0412	34.8143	37.771
1376	138.813	111.05	57.191	77.0412	34.8143	37.771
1377	138.813	111.05	57.191	77.0412	34.8143	37.771
1378	139.5	111.6	57.474	77.4225	34.9866	37.9579
1379	139.375	111.5	57.4225	77.3531	34.9552	37.9239
1380	138.313	110.65	56.985	76.7637	34.6889	37.635
1381	138.063	110.45	56.882	76.625	34.6262	37.5669
1382	138.938	111.15	57.2425	77.1106	34.8456	37.805
1383	138.25	110.6	56.959	76.7288	34.6731	37.6178
1384	139.563	111.65	57.5	77.4575	35.0024	37.9751
1385	137.875	110.3	56.8045	76.5206	34.5791	37.5158
1386	138.5	110.8	57.062	76.8675	34.7358	37.6859
1387	137.75	110.2	56.753	76.4513	34.5477	37.4818
1388	138.813	111.05	57.191	77.0412	34.8143	37.771
1389	139.313	111.45	57.397	77.3187	34.9397	37.9071
1390	138.25	110.6	56.959	76.7288	34.6731	37.6178
1391	138.438	110.75	57.0365	76.8331	34.7203	37.669
1392	137.313	109.85	56.573	76.2087	34.4381	37.3629
1393	137.875	110.3	56.8045	76.5206	34.5791	37.5158
1394	137.563	110.05	56.676	76.3475	34.5008	37.4309
1395	138.375	110.7	57.0105	76.7981	34.7045	37.6518
1396	138.438	110.75	57.0365	76.8331	34.7203	37.669
1397	138.344	110.675	56.9977	76.7809	34.6967	37.6434
1398	138.375	110.7	57.0105	76.7981	34.7045	37.6518
1399	138.188	110.55	56.9335	76.6943	34.6576	37.6009
1400	138.188	110.55	56.9335	76.6943	34.6576	37.6009
1401	138.063	110.45	56.882	76.625	34.6262	37.5669
1402	138.125	110.5	56.9075	76.6594	34.6418	37.5838
1403	137.875	110.3	56.8045	76.5206	34.5791	37.5158
1404	137.438	109.95	56.6245	76.2781	34.4695	37.3969
1405	136.75	109.4	56.341	75.8962	34.2969	37.2097
1406	137.375	109.9	56.5985	76.2431	34.4537	37.3797
1407	136.813	109.45	56.367	75.9312	34.3127	37.2268
1408	136.688	109.35	56.3155	75.8618	34.2814	37.1928
1409	137.5	110	56.65	76.3125	34.485	37.4138
1410	137.625	110.1	56.7015	76.3819	34.5164	37.4478
1411	137.031	109.625	56.4568	76.0522	34.3674	37.2861
1412	136.5	109.2	56.238	75.7575	34.2342	37.1416
1413	136.5	109.2	56.238	75.7575	34.2342	37.1416
1414	137.375	109.9	56.5985	76.2431	34.4537	37.3797
1415	137.375	109.9	56.5985	76.2431	34.4537	37.3797
1416	137.625	110.1	56.7015	76.3819	34.5164	37.4478
1417	136.375	109.1	56.1865	75.6881	34.2028	37.1076
1418	137	109.6	56.444	76.035	34.3596	37.2777
1419	136.688	109.35	56.3155	75.8618	34.2814	37.1928
1420	136.813	109.45	56.367	75.9312	34.3127	37.2268
1421	136.563	109.25	56.264	75.7925	34.25	37.1588
1422	136.266	109.013	56.1416	75.6276	34.1755	37.078
1423	135.75	108.6	55.929	75.3413	34.0461	36.9376
1424	135.938	108.75	56.0065	75.4456	34.0932	36.9887
1425	136.313	109.05	56.161	75.6537	34.1873	37.0908
1426	137.563	110.05	56.676	76.3475	34.5008	37.4309
1427	135.563	108.45	55.852	75.2375	33.9992	36.8867
1428	136.75	109.4	56.341	75.8962	34.2969	37.2097
1429	137.375	109.9	56.5985	76.2431	34.4537	37.3797
1430	137.688	110.15	56.7275	76.4168	34.5322	37.4649
1431	136.875	109.5	56.3925	75.9656	34.3282	37.2437
1432	136.25	109	56.135	75.6188	34.1715	37.0736
1433	136.438	109.15	56.2125	75.7231	34.2186	37.1248
1434	136.25	109	56.135	75.6188	34.1715	37.0736
1435	135.859	108.687	55.9739	75.4018	34.0734	36.9672
1436	135.25	108.2	55.723	75.0637	33.9207	36.8015
1437	135.5	108.4	55.826	75.2025	33.9834	36.8695
1438	135.391	108.313	55.7811	75.142	33.9561	36.8399
1439	135.5	108.4	55.826	75.2025	33.9834	36.8695
1440	135.313	108.25	55.749	75.0987	33.9365	36.8187
1441	136.063	108.85	56.058	75.515	34.1246	37.0227
1442	136.188	108.95	56.1095	75.5843	34.1559	37.0568
1443	137.25	109.8	56.547	76.1737	34.4223	37.3457
1444	136.75	109.4	56.341	75.8962	34.2969	37.2097
1445	134.563	107.65	55.44	74.6825	33.7484	36.6146
1446	135.125	108.1	55.6715	74.9944	33.8894	36.7675
1447	134.969	107.975	55.6072	74.9078	33.8502	36.7251
1448	135	108	55.62	74.925	33.858	36.7335
1449	135.188	108.15	55.6975	75.0293	33.9051	36.7846
1450	134.375	107.5	55.3625	74.5781	33.7013	36.5634
1451	135	108	55.62	74.925	33.858	36.7335
1452	134.688	107.75	55.4915	74.7518	33.7797	36.6486
1453	135	108	55.62	74.925	33.858	36.7335
1454	135.438	108.35	55.8005	75.1681	33.9678	36.8527
1455	135.313	108.25	55.749	75.0987	33.9365	36.8187
1456	135.25	108.2	55.723	75.0637	33.9207	36.8015
1457	134.891	107.913	55.5751	74.8645	33.8307	36.7038
1458	134.688	107.75	55.4915	74.7518	33.7797	36.6486
1459	134.313	107.45	55.337	74.5437	33.6857	36.5466
1460	134.719	107.775	55.5042	74.769	33.7875	36.657
1461	134.938	107.95	55.5945	74.8906	33.8424	36.7166
1462	134.938	107.95	55.5945	74.8906	33.8424	36.7166
1463	134.125	107.3	55.2595	74.4394	33.6386	36.4954
1464	135.813	108.65	55.955	75.3762	34.0619	36.9547
1465	134.625	107.7	55.4655	74.7169	33.764	36.6315
1466	135.063	108.05	55.646	74.96	33.8738	36.7506
1467	134.063	107.25	55.234	74.405	33.623	36.4785
1468	134.375	107.5	55.3625	74.5781	33.7013	36.5634
1469	134.063	107.25	55.234	74.405	33.623	36.4785
1470	135.688	108.55	55.9035	75.3068	34.0305	36.9207
1471	134.75	107.8	55.517	74.7862	33.7953	36.6655
1472	134.125	107.3	55.2595	74.4394	33.6386	36.4954
1473	134.344	107.475	55.3497	74.5609	33.6935	36.555
1474	134.313	107.45	55.337	74.5437	33.6857	36.5466
1475	134.188	107.35	55.2855	74.4743	33.6544	36.5125
1476	133.938	107.15	55.1825	74.3356	33.5917	36.4445
1477	133.938	107.15	55.1825	74.3356	33.5917	36.4445
1478	133.609	106.887	55.0469	74.153	33.5091	36.355
1479	133.313	106.65	54.925	73.9887	33.4349	36.2745
1480	133.25	106.6	54.899	73.9537	33.4191	36.2573
1481	132.75	106.2	54.693	73.6762	33.2937	36.1213
1482	132.625	106.1	54.6415	73.6069	33.2623	36.0873
1483	133.266	106.613	54.9056	73.9626	33.4231	36.2617
1484	133.625	106.9	55.0535	74.1619	33.5132	36.3594
1485	134.063	107.25	55.234	74.405	33.623	36.4785
1486	133.25	106.6	54.899	73.9537	33.4191	36.2573
1487	133.813	107.05	55.131	74.2662	33.5603	36.4105
1488	133.719	106.975	55.0922	74.2141	33.5367	36.3849
1489	133.813	107.05	55.131	74.2662	33.5603	36.4105
1490	134	107.2	55.208	74.37	33.6072	36.4614
1491	133.25	106.6	54.899	73.9537	33.4191	36.2573
1492	132.438	105.95	54.5645	73.5031	33.2154	36.0364
1493	133.313	106.65	54.925	73.9887	33.4349	36.2745
1494	133	106.4	54.796	73.815	33.3564	36.1893
1495	132.313	105.85	54.513	73.4337	33.1841	36.0024
1496	132.875	106.3	54.7445	73.7456	33.325	36.1553
1497	133.75	107	55.105	74.2313	33.5445	36.3934
1498	133.625	106.9	55.0535	74.1619	33.5132	36.3594
1499	134.125	107.3	55.2595	74.4394	33.6386	36.4954
1500	133.75	107	55.105	74.2313	33.5445	36.3934
1501	133.063	106.45	54.822	73.85	33.3722	36.2064
1502	132.813	106.25	54.719	73.7112	33.3095	36.1384
1503	132.25	105.8	54.487	73.3988	33.1683	35.9852
1504	131.625	105.3	54.2295	73.0519	33.0115	35.8152
1505	132.5	106	54.59	73.5375	33.231	36.0532
1506	133.438	106.75	54.9765	74.0581	33.4663	36.3085
1507	132.813	106.25	54.719	73.7112	33.3095	36.1384
1508	132.563	106.05	54.616	73.5725	33.2468	36.0704
1509	132.5	106	54.59	73.5375	33.231	36.0532
1510	131.875	105.5	54.3325	73.1906	33.0742	35.8832
1511	131.25	105	54.075	72.8438	32.9175	35.7131
1512	132.938	106.35	54.7705	73.7806	33.3409	36.1724
1513	130.938	104.75	53.9465	72.6706	32.8392	35.6282
1514	131.625	105.3	54.2295	73.0519	33.0115	35.8152
1515	131.375	105.1	54.1265	72.9131	32.9489	35.7471
1516	131.5	105.2	54.178	72.9825	32.9802	35.7811
1517	131.438	105.15	54.1525	72.9481	32.9646	35.7643
1518	131.375	105.1	54.1265	72.9131	32.9489	35.7471
1519	131.375	105.1	54.1265	72.9131	32.9489	35.7471
1520	131.313	105.05	54.101	72.8787	32.9333	35.7303
1521	131.375	105.1	54.1265	72.9131	32.9489	35.7471
1522	130.906	104.725	53.9333	72.6528	32.8312	35.6195
1523	130.625	104.5	53.8175	72.4969	32.7608	35.5431
1524	130.313	104.25	53.689	72.3237	32.6825	35.4582
1525	131.25	105	54.075	72.8438	32.9175	35.7131
1526	132.25	105.8	54.487	73.3988	33.1683	35.9852
1527	131.5	105.2	54.178	72.9825	32.9802	35.7811
1528	130.813	104.65	53.895	72.6012	32.8079	35.5942
1529	131.25	105	54.075	72.8438	32.9175	35.7131
1530	131.563	105.25	54.204	73.0175	32.996	35.7983
1531	131.25	105	54.075	72.8438	32.9175	35.7131
1532	131.375	105.1	54.1265	72.9131	32.9489	35.7471
1533	131.063	104.85	53.998	72.74	32.8706	35.6622
1534	131.625	105.3	54.2295	73.0519	33.0115	35.8152
1535	131.313	105.05	54.101	72.8787	32.9333	35.7303
1536	131	104.8	53.972	72.705	32.8548	35.6451
1537	130.625	104.5	53.8175	72.4969	32.7608	35.5431
1538	130	104	53.56	72.15	32.604	35.373
1539	130.656	104.525	53.8303	72.5141	32.7685	35.5515
1540	131	104.8	53.972	72.705	32.8548	35.6451
1541	131	104.8	53.972	72.705	32.8548	35.6451
1542	130.813	104.65	53.895	72.6012	32.8079	35.5942
1543	130.813	104.65	53.895	72.6012	32.8079	35.5942
1544	130.688	104.55	53.8435	72.5318	32.7766	35.5602
1545	130.75	104.6	53.869	72.5662	32.7921	35.5771
1546	131.375	105.1	54.1265	72.9131	32.9489	35.7471
1547	131.875	105.5	54.3325	73.1906	33.0742	35.8832
1548	130.625	104.5	53.8175	72.4969	32.7608	35.5431
1549	131.125	104.9	54.0235	72.7744	32.8862	35.6791
1550	130.875	104.7	53.9205	72.6356	32.8235	35.6111
1551	130.625	104.5	53.8175	72.4969	32.7608	35.5431
1552	130.125	104.1	53.6115	72.2194	32.6354	35.407
1553	130.438	104.35	53.7405	72.3931	32.7139	35.4922
1554	129.688	103.75	53.4315	71.9768	32.5258	35.2881
1555	130.875	104.7	53.9205	72.6356	32.8235	35.6111
1556	130.063	104.05	53.586	72.185	32.6198	35.3901
1557	130.125	104.1	53.6115	72.2194	32.6354	35.407
1558	128.875	103.1	53.0965	71.5256	32.3218	35.0669
1559	130.313	104.25	53.689	72.3237	32.6825	35.4582
1560	128.75	103	53.045	71.4562	32.2905	35.0329
1561	129.875	103.9	53.5085	72.0806	32.5727	35.339
1562	128.625	102.9	52.9935	71.3869	32.2591	34.9989
1563	129.938	103.95	53.5345	72.1156	32.5885	35.3561
1564	131.125	104.9	54.0235	72.7744	32.8862	35.6791
1565	129.375	103.5	53.3025	71.8031	32.4472	35.2029
1566	129.563	103.65	53.38	71.9075	32.4944	35.2541
1567	129.625	103.7	53.4055	71.9419	32.51	35.271
1568	129.375	103.5	53.3025	71.8031	32.4472	35.2029
1569	129.063	103.25	53.174	71.63	32.369	35.118
1570	129.625	103.7	53.4055	71.9419	32.51	35.271
1571	128.125	102.5	52.7875	71.1094	32.1337	34.8628
1572	129.938	103.95	53.5345	72.1156	32.5885	35.3561
1573	129.188	103.35	53.2255	71.6993	32.4004	35.1521
1574	128.625	102.9	52.9935	71.3869	32.2591	34.9989
1575	130.375	104.3	53.7145	72.3581	32.6981	35.475
1576	129.625	103.7	53.4055	71.9419	32.51	35.271
1577	129	103.2	53.148	71.595	32.3532	35.1009
1578	129.313	103.45	53.277	71.7687	32.4317	35.1861
1579	128.938	103.15	53.1225	71.5606	32.3376	35.084
1580	129.063	103.25	53.174	71.63	32.369	35.118
1581	129.266	103.413	53.2576	71.7426	32.4199	35.1733
1582	129.625	103.7	53.4055	71.9419	32.51	35.271
1583	129.438	103.55	53.3285	71.8381	32.4631	35.2201
1584	128.563	102.85	52.968	71.3525	32.2436	34.982
1585	128.5	102.8	52.942	71.3175	32.2278	34.9648
1586	129.25	103.4	53.251	71.7338	32.4159	35.1689
1587	128.25	102.6	52.839	71.1787	32.1651	34.8968
1588	129.375	103.5	53.3025	71.8031	32.4472	35.2029
1589	128.563	102.85	52.968	71.3525	32.2436	34.982
1590	128.188	102.55	52.8135	71.1443	32.1495	34.88
1591	128	102.4	52.736	71.04	32.1024	34.8288
1592	127.875	102.3	52.6845	70.9706	32.071	34.7948
1593	127.375	101.9	52.4785	70.6931	31.9457	34.6587
1594	128.438	102.75	52.9165	71.2831	32.2122	34.948
1595	129.125	103.3	53.1995	71.6644	32.3845	35.1349
1596	128.375	102.7	52.8905	71.2481	32.1964	34.9308
1597	128.75	103	53.045	71.4562	32.2905	35.0329
1598	128	102.4	52.736	71.04	32.1024	34.8288
1599	128.125	102.5	52.7875	71.1094	32.1337	34.8628
1600	127.75	102.2	52.633	70.9013	32.0397	34.7608
1601	128.563	102.85	52.968	71.3525	32.2436	34.982
1602	127.938	102.35	52.7105	71.0056	32.0868	34.8119
1603	127.25	101.8	52.427	70.6238	31.9143	34.6247
1604	128.25	102.6	52.839	71.1787	32.1651	34.8968
1605	127.938	102.35	52.7105	71.0056	32.0868	34.8119
1606	127.25	101.8	52.427	70.6238	31.9143	34.6247
1607	127.375	101.9	52.4785	70.6931	31.9457	34.6587
1608	127.438	101.95	52.5045	70.7281	31.9614	34.6759
1609	127.25	101.8	52.427	70.6238	31.9143	34.6247
1610	128.063	102.45	52.762	71.075	32.1182	34.8459
1611	126.688	101.35	52.1955	70.3118	31.7734	34.4718
1612	127.938	102.35	52.7105	71.0056	32.0868	34.8119
1613	127.063	101.65	52.35	70.52	31.8674	34.5738
1614	127.813	102.25	52.659	70.9362	32.0555	34.7779
1615	127.375	101.9	52.4785	70.6931	31.9457	34.6587
1616	126.563	101.25	52.144	70.2425	31.742	34.4378
1617	128.75	103	53.045	71.4562	32.2905	35.0329
1618	126.25	101	52.015	70.0687	31.6635	34.3526
1619	127	101.6	52.324	70.485	31.8516	34.5567
1620	127.875	102.3	52.6845	70.9706	32.071	34.7948
1621	125.625	100.5	51.7575	69.7219	31.5068	34.1826
1622	127.5	102	52.53	70.7625	31.977	34.6927
1623	127.063	101.65	52.35	70.52	31.8674	34.5738
1624	126.313	101.05	52.041	70.1037	31.6793	34.3698
1625	126.563	101.25	52.144	70.2425	31.742	34.4378
1626	126.688	101.35	52.1955	70.3118	31.7734	34.4718
1627	126.938	101.55	52.2985	70.4506	31.8361	34.5398
1628	126.688	101.35	52.1955	70.3118	31.7734	34.4718
1629	126.375	101.1	52.0665	70.1381	31.6948	34.3866
1630	125.625	100.5	51.7575	69.7219	31.5068	34.1826
1631	126.125	100.9	51.9635	69.9994	31.6321	34.3186
1632	126.25	101	52.015	70.0687	31.6635	34.3526
1633	126.25	101	52.015	70.0687	31.6635	34.3526
1634	126.75	101.4	52.221	70.3462	31.7889	34.4887
1635	126.625	101.3	52.1695	70.2769	31.7575	34.4547
1636	126.188	100.95	51.9895	70.0343	31.648	34.3357
1637	127.563	102.05	52.556	70.7975	31.9928	34.7099
1638	125.688	100.55	51.7835	69.7568	31.5225	34.1997
1639	126.375	101.1	52.0665	70.1381	31.6948	34.3866
1640	126.094	100.875	51.9507	69.9822	31.6244	34.3102
1641	126.125	100.9	51.9635	69.9994	31.6321	34.3186
1642	126.188	100.95	51.9895	70.0343	31.648	34.3357
1643	126.188	100.95	51.9895	70.0343	31.648	34.3357
1644	126.813	101.45	52.247	70.3812	31.8047	34.5058
1645	126.938	101.55	52.2985	70.4506	31.8361	34.5398
1646	125.438	100.35	51.6805	69.6181	31.4598	34.1317
1647	126.375	101.1	52.0665	70.1381	31.6948	34.3866
1648	125.438	100.35	51.6805	69.6181	31.4598	34.1317
1649	125.625	100.5	51.7575	69.7219	31.5068	34.1826
1650	126.438	101.15	52.0925	70.1731	31.7107	34.4038
1651	126	100.8	51.912	69.93	31.6008	34.2846
1652	125.375	100.3	51.6545	69.5831	31.4441	34.1145
1653	125.813	100.65	51.835	69.8262	31.5539	34.2337
1654	124.688	99.7504	51.3715	69.2018	31.2718	33.9276
1655	126.5	101.2	52.118	70.2075	31.7262	34.4207
1656	125.375	100.3	51.6545	69.5831	31.4441	34.1145
1657	124.938	99.9504	51.4745	69.3406	31.3345	33.9956
1658	124.563	99.6504	51.32	69.1325	31.2404	33.8936
1659	126.063	100.85	51.938	69.965	31.6166	34.3017
1660	126.563	101.25	52.144	70.2425	31.742	34.4378
1661	124.813	99.8504	51.423	69.2712	31.3031	33.9616
1662	125.5	100.4	51.706	69.6525	31.4754	34.1486
1663	124.5	99.6	51.294	69.0975	31.2246	33.8764
1664	126.25	101	52.015	70.0687	31.6635	34.3526
1665	125.688	100.55	51.7835	69.7568	31.5225	34.1997
1666	125.813	100.65	51.835	69.8262	31.5539	34.2337
1667	125.438	100.35	51.6805	69.6181	31.4598	34.1317
1668	125.313	100.25	51.629	69.5487	31.4285	34.0977
1669	124.672	99.7376	51.3649	69.193	31.2677	33.9233
1670	123.563	98.8504	50.908	68.5775	30.9896	33.6215
1671	124.375	99.5	51.2425	69.0281	31.1932	33.8424
1672	124.063	99.2504	51.114	68.855	31.115	33.7575
1673	124.5	99.6	51.294	69.0975	31.2246	33.8764
1674	126.125	100.9	51.9635	69.9994	31.6321	34.3186
1675	124.188	99.3504	51.1655	68.9243	31.1464	33.7916
1676	124.938	99.9504	51.4745	69.3406	31.3345	33.9956
1677	124.313	99.4504	51.217	68.9937	31.1777	33.8256
1678	123.875	99.1	51.0365	68.7506	31.0678	33.7064
1679	124.25	99.4	51.191	68.9587	31.1619	33.8084
1680	124.75	99.8	51.397	69.2362	31.2873	33.9445
1681	125.75	100.6	51.809	69.7913	31.5381	34.2166
1682	123.75	99	50.985	68.6813	31.0365	33.6724
1683	124.5	99.6	51.294	69.0975	31.2246	33.8764
1684	123.688	98.9504	50.9595	68.6468	31.0209	33.6555
1685	124.563	99.6504	51.32	69.1325	31.2404	33.8936
1686	124.188	99.3504	51.1655	68.9243	31.1464	33.7916
1687	124.375	99.5	51.2425	69.0281	31.1932	33.8424
1688	124.266	99.4128	51.1976	68.9676	31.1659	33.8128
1689	124.125	99.3	51.1395	68.8894	31.1305	33.7744
1690	124.375	99.5	51.2425	69.0281	31.1932	33.8424
1691	123.313	98.6504	50.805	68.4387	30.9269	33.5535
1692	125.063	100.05	51.526	69.41	31.3658	34.0296
1693	123.313	98.6504	50.805	68.4387	30.9269	33.5535
1694	123.375	98.7	50.8305	68.4731	30.9425	33.5703
1695	123.563	98.8504	50.908	68.5775	30.9896	33.6215
1696	123.75	99	50.985	68.6813	31.0365	33.6724
1697	123.188	98.5504	50.7535	68.3693	30.8956	33.5194
1698	123.688	98.9504	50.9595	68.6468	31.0209	33.6555
1699	124.125	99.3	51.1395	68.8894	31.1305	33.7744
1700	124.438	99.5504	51.2685	69.0631	31.2091	33.8596
1701	124.125	99.3	51.1395	68.8894	31.1305	33.7744
1702	123.438	98.7504	50.8565	68.5081	30.9582	33.5875
1703	123.938	99.1504	51.0625	68.7856	31.0836	33.7235
1704	123.813	99.0504	51.011	68.7162	31.0523	33.6895
1705	123.625	98.9	50.9335	68.6119	31.0052	33.6384
1706	123.75	99	50.985	68.6813	31.0365	33.6724
1707	123.5	98.8	50.882	68.5425	30.9738	33.6043
1708	124.063	99.2504	51.114	68.855	31.115	33.7575
1709	123.875	99.1	51.0365	68.7506	31.0678	33.7064
1710	123.625	98.9	50.9335	68.6119	31.0052	33.6384
1711	123.125	98.5	50.7275	68.3344	30.8798	33.5023
1712	122.875	98.3	50.6245	68.1956	30.817	33.4343
1713	124.313	99.4504	51.217	68.9937	31.1777	33.8256
1714	123.438	98.7504	50.8565	68.5081	30.9582	33.5875
1715	124.625	99.7	51.3455	69.1669	31.2559	33.9105
1716	122.5	98	50.47	67.9875	30.723	33.3323
1717	123.188	98.5504	50.7535	68.3693	30.8956	33.5194
1718	122.25	97.8	50.367	67.8487	30.6603	33.2642
1719	122.75	98.2	50.573	68.1262	30.7857	33.4003
1720	123.313	98.6504	50.805	68.4387	30.9269	33.5535
1721	122.25	97.8	50.367	67.8487	30.6603	33.2642
1722	123.188	98.5504	50.7535	68.3693	30.8956	33.5194
1723	122.938	98.3504	50.6505	68.2306	30.8329	33.4514
1724	122.625	98.1	50.5215	68.0569	30.7543	33.3663
1725	121.875	97.5	50.2125	67.6406	30.5663	33.1622
1726	122.5	98	50.47	67.9875	30.723	33.3323
1727	124	99.2	51.088	68.82	31.0992	33.7404
1728	122.063	97.6504	50.29	67.745	30.6134	33.2133
1729	123	98.4	50.676	68.265	30.8484	33.4683
1730	121.625	97.3	50.1095	67.5019	30.5036	33.0942
1731	122	97.6	50.264	67.71	30.5976	33.1962
1732	122.063	97.6504	50.29	67.745	30.6134	33.2133
1733	122.313	97.8504	50.393	67.8837	30.6761	33.2814
1734	122.375	97.9	50.4185	67.9181	30.6916	33.2982
1735	122.875	98.3	50.6245	68.1956	30.817	33.4343
1736	122.125	97.7	50.3155	67.7794	30.6289	33.2302
1737	122.563	98.0504	50.496	68.0225	30.7388	33.3494
1738	123.375	98.7	50.8305	68.4731	30.9425	33.5703
1739	123.063	98.4504	50.702	68.3	30.8642	33.4854
1740	121.75	97.4	50.161	67.5713	30.5349	33.1282
1741	121	96.8	49.852	67.155	30.3468	32.9241
1742	120.875	96.7	49.8005	67.0856	30.3154	32.8901
1743	122.188	97.7504	50.3415	67.8143	30.6447	33.2473
1744	122.375	97.9	50.4185	67.9181	30.6916	33.2982
1745	122.375	97.9	50.4185	67.9181	30.6916	33.2982
1746	121.438	97.1504	50.0325	67.3981	30.4566	33.0433
1747	123.438	98.7504	50.8565	68.5081	30.9582	33.5875
1748	121.688	97.3504	50.1355	67.5368	30.5193	33.1113
1749	121.188	96.9504	49.9295	67.2593	30.394	32.9753
1750	120.75	96.6	49.749	67.0162	30.2841	32.8561
1751	121.641	97.3128	50.1161	67.5108	30.5076	33.0985
1752	122.125	97.7	50.3155	67.7794	30.6289	33.2302
1753	122.5	98	50.47	67.9875	30.723	33.3323
1754	122.375	97.9	50.4185	67.9181	30.6916	33.2982
1755	122.125	97.7	50.3155	67.7794	30.6289	33.2302
1756	121.688	97.3504	50.1355	67.5368	30.5193	33.1113
1757	120.875	96.7	49.8005	67.0856	30.3154	32.8901
1758	120.875	96.7	49.8005	67.0856	30.3154	32.8901
1759	121.125	96.9	49.9035	67.2244	30.3782	32.9581
1760	121.188	96.9504	49.9295	67.2593	30.394	32.9753
1761	121.063	96.8504	49.878	67.19	30.3626	32.9412
1762	121.438	97.1504	50.0325	67.3981	30.4566	33.0433
1763	120.688	96.5504	49.7235	66.9818	30.2686	32.8392
1764	121.625	97.3	50.1095	67.5019	30.5036	33.0942
1765	122.063	97.6504	50.29	67.745	30.6134	33.2133
1766	121.375	97.1	50.0065	67.3631	30.4409	33.0261
1767	122.563	98.0504	50.496	68.0225	30.7388	33.3494
1768	122.125	97.7	50.3155	67.7794	30.6289	33.2302
1769	121.375	97.1	50.0065	67.3631	30.4409	33.0261
1770	120.438	96.3504	49.6205	66.8431	30.2059	32.7712
1771	121.125	96.9	49.9035	67.2244	30.3782	32.9581
1772	120.875	96.7	49.8005	67.0856	30.3154	32.8901
1773	120.25	96.2	49.543	66.7387	30.1587	32.72
1774	120.625	96.5	49.6975	66.9469	30.2527	32.8221
1775	120.625	96.5	49.6975	66.9469	30.2527	32.8221
1776	120.656	96.5248	49.7103	66.9641	30.2605	32.8305
1777	120.75	96.6	49.749	67.0162	30.2841	32.8561
1778	120.625	96.5	49.6975	66.9469	30.2527	32.8221
1779	120.844	96.6752	49.7877	67.0684	30.3077	32.8817
1780	121.125	96.9	49.9035	67.2244	30.3782	32.9581
1781	120.875	96.7	49.8005	67.0856	30.3154	32.8901
1782	120.625	96.5	49.6975	66.9469	30.2527	32.8221
1783	120.406	96.3248	49.6073	66.8253	30.1978	32.7625
1784	120.313	96.2504	49.569	66.7737	30.1745	32.7372
1785	120.242	96.1936	49.5397	66.7343	30.1567	32.7178
1786	120.188	96.1504	49.5175	66.7043	30.1431	32.7032
1787	120.404	96.3232	49.6065	66.8242	30.1973	32.7619
1788	120.563	96.4504	49.672	66.9125	30.2372	32.8052
1789	120.625	96.5	49.6975	66.9469	30.2527	32.8221
1790	119.563	95.6504	49.26	66.3575	29.9864	32.5331
1791	119.938	95.9504	49.4145	66.5656	30.0804	32.6351
1792	119.438	95.5504	49.2085	66.2881	29.955	32.4991
1793	120	96	49.44	66.6	30.096	32.652
1794	119	95.2	49.028	66.045	29.8452	32.3799
1795	119.625	95.7	49.2855	66.3919	30.002	32.55
1796	120.688	96.5504	49.7235	66.9818	30.2686	32.8392
1797	120.313	96.2504	49.569	66.7737	30.1745	32.7372
1798	119.688	95.7504	49.3115	66.4268	30.0177	32.5671
1799	119.438	95.5504	49.2085	66.2881	29.955	32.4991
1800	119.953	95.9624	49.4206	66.5739	30.0842	32.6392
1801	120.688	96.5504	49.7235	66.9818	30.2686	32.8392
1802	120	96	49.44	66.6	30.096	32.652
1803	119.75	95.8	49.337	66.4613	30.0333	32.584
1804	120.109	96.0872	49.4849	66.6605	30.1233	32.6817
1805	120.625	96.5	49.6975	66.9469	30.2527	32.8221
1806	120.063	96.0504	49.466	66.635	30.1118	32.6691
1807	119.375	95.5	49.1825	66.2531	29.9393	32.4819
1808	119.375	95.5	49.1825	66.2531	29.9393	32.4819
1809	119.188	95.3504	49.1055	66.1493	29.8924	32.431
1810	120.438	96.3504	49.6205	66.8431	30.2059	32.7712
1811	120	96	49.44	66.6	30.096	32.652
1812	118.938	95.1504	49.0025	66.0106	29.8297	32.363
1813	118.75	95	48.925	65.9062	29.7825	32.3119
1814	119.25	95.4	49.131	66.1838	29.9079	32.4479
1815	118.938	95.1504	49.0025	66.0106	29.8297	32.363
1816	119	95.2	49.028	66.045	29.8452	32.3799
1817	118.875	95.1	48.9765	65.9756	29.8138	32.3459
1818	119.063	95.2504	49.054	66.08	29.861	32.397
1819	118.938	95.1504	49.0025	66.0106	29.8297	32.363
1820	120.438	96.3504	49.6205	66.8431	30.2059	32.7712
1821	119.688	95.7504	49.3115	66.4268	30.0177	32.5671
1822	120.438	96.3504	49.6205	66.8431	30.2059	32.7712
1823	120.063	96.0504	49.466	66.635	30.1118	32.6691
1824	118.75	95	48.925	65.9062	29.7825	32.3119
1825	118.5	94.8	48.822	65.7675	29.7198	32.2439
1826	119.25	95.4	49.131	66.1838	29.9079	32.4479
1827	119.313	95.4504	49.157	66.2187	29.9237	32.4651
1828	119.5	95.6	49.234	66.3225	29.9706	32.5159
1829	118.313	94.6504	48.745	65.6637	29.6729	32.193
1830	120.438	96.3504	49.6205	66.8431	30.2059	32.7712
1831	119	95.2	49.028	66.045	29.8452	32.3799
1832	120.438	96.3504	49.6205	66.8431	30.2059	32.7712
1833	118.625	94.9	48.8735	65.8369	29.7511	32.2779
1834	118.625	94.9	48.8735	65.8369	29.7511	32.2779
1835	119.063	95.2504	49.054	66.08	29.861	32.397
1836	118.813	95.0504	48.951	65.9412	29.7983	32.329
1837	119.313	95.4504	49.157	66.2187	29.9237	32.4651
1838	119.375	95.5	49.1825	66.2531	29.9393	32.4819
1839	119.094	95.2752	49.0667	66.0972	29.8688	32.4055
1840	118.75	95	48.925	65.9062	29.7825	32.3119
1841	118.938	95.1504	49.0025	66.0106	29.8297	32.363
1842	119	95.2	49.028	66.045	29.8452	32.3799
1843	118.375	94.7	48.7705	65.6981	29.6884	32.2098
1844	118.75	95	48.925	65.9062	29.7825	32.3119
1845	118.25	94.6	48.719	65.6287	29.6571	32.1758
1846	118.75	95	48.925	65.9062	29.7825	32.3119
1847	118.438	94.7504	48.7965	65.7331	29.7042	32.227
1848	118.922	95.1376	48.9959	66.0017	29.8256	32.3587
1849	119.25	95.4	49.131	66.1838	29.9079	32.4479
1850	119.25	95.4	49.131	66.1838	29.9079	32.4479
1851	118.563	94.8504	48.848	65.8025	29.7356	32.261
1852	117.75	94.2	48.513	65.3512	29.5317	32.0398
1853	118	94.4	48.616	65.49	29.5944	32.1078
1854	117.828	94.2624	48.5451	65.3945	29.5513	32.061
1855	117.875	94.3	48.5645	65.4206	29.5631	32.0738
1856	117.688	94.1504	48.4875	65.3168	29.5161	32.0229
1857	117.688	94.1504	48.4875	65.3168	29.5161	32.0229
1858	117.75	94.2	48.513	65.3512	29.5317	32.0398
1859	118.094	94.4752	48.6547	65.5422	29.618	32.1334
1860	118.375	94.7	48.7705	65.6981	29.6884	32.2098
1861	118.563	94.8504	48.848	65.8025	29.7356	32.261
1862	118.563	94.8504	48.848	65.8025	29.7356	32.261
1863	118	94.4	48.616	65.49	29.5944	32.1078
1864	117.313	93.8504	48.333	65.1087	29.4221	31.9209
1865	117.063	93.6504	48.23	64.97	29.3594	31.8528
1866	117.375	93.9	48.3585	65.1431	29.4377	31.9377
1867	117.813	94.2504	48.539	65.3862	29.5475	32.0569
1868	118.5	94.8	48.822	65.7675	29.7198	32.2439
1869	117.063	93.6504	48.23	64.97	29.3594	31.8528
1870	118.25	94.6	48.719	65.6287	29.6571	32.1758
1871	117.25	93.8	48.307	65.0738	29.4063	31.9037
1872	117.688	94.1504	48.4875	65.3168	29.5161	32.0229
1873	117.813	94.2504	48.539	65.3862	29.5475	32.0569
1874	117.875	94.3	48.5645	65.4206	29.5631	32.0738
1875	117	93.6	48.204	64.935	29.3436	31.8357
1876	117.938	94.3504	48.5905	65.4556	29.5788	32.0909
1877	117.438	93.9504	48.3845	65.1781	29.4535	31.9549
1878	117.125	93.7	48.2555	65.0044	29.3749	31.8697
1879	115.875	92.7	47.7405	64.3106	29.0615	31.5296
1880	116.25	93	47.895	64.5187	29.1555	31.6316
1881	116.453	93.1624	47.9786	64.6314	29.2064	31.6869
1882	116.75	93.4	48.101	64.7963	29.2809	31.7677
1883	116.938	93.5504	48.1785	64.9006	29.3281	31.8188
1884	116.438	93.1504	47.9725	64.6231	29.2026	31.6828
1885	117.063	93.6504	48.23	64.97	29.3594	31.8528
1886	116.313	93.0504	47.921	64.5537	29.1713	31.6488
1887	117	93.6	48.204	64.935	29.3436	31.8357
1888	117	93.6	48.204	64.935	29.3436	31.8357
1889	116.781	93.4248	48.1138	64.8135	29.2887	31.7761
1890	116.625	93.3	48.0495	64.7269	29.2495	31.7337
1891	116.5	93.2	47.998	64.6575	29.2182	31.6996
1892	116	92.8	47.792	64.38	29.0928	31.5636
1893	116.438	93.1504	47.9725	64.6231	29.2026	31.6828
1894	116.25	93	47.895	64.5187	29.1555	31.6316
1895	116.219	92.9752	47.8822	64.5015	29.1477	31.6232
1896	116.188	92.9504	47.8695	64.4843	29.1399	31.6148
1897	116	92.8	47.792	64.38	29.0928	31.5636
1898	116.188	92.9504	47.8695	64.4843	29.1399	31.6148
1899	116.563	93.2504	48.024	64.6925	29.234	31.7168
1900	116	92.8	47.792	64.38	29.0928	31.5636
1901	117	93.6	48.204	64.935	29.3436	31.8357
1902	117.5	94	48.41	65.2125	29.469	31.9718
1903	116.5	93.2	47.998	64.6575	29.2182	31.6996
1904	115.75	92.6	47.689	64.2412	29.0301	31.4956
1905	116.063	92.8504	47.818	64.415	29.1086	31.5807
1906	116.188	92.9504	47.8695	64.4843	29.1399	31.6148
1907	116.25	93	47.895	64.5187	29.1555	31.6316
1908	116.313	93.0504	47.921	64.5537	29.1713	31.6488
1909	117.25	93.8	48.307	65.0738	29.4063	31.9037
1910	115.625	92.5	47.6375	64.1719	28.9988	31.4616
1911	116.313	93.0504	47.921	64.5537	29.1713	31.6488
1912	115.438	92.3504	47.5605	64.0681	28.9519	31.4107
1913	115.625	92.5	47.6375	64.1719	28.9988	31.4616
1914	115.563	92.4504	47.612	64.1375	28.9832	31.4447
1915	115.438	92.3504	47.5605	64.0681	28.9519	31.4107
1916	115.438	92.3504	47.5605	64.0681	28.9519	31.4107
1917	116.313	93.0504	47.921	64.5537	29.1713	31.6488
1918	115.625	92.5	47.6375	64.1719	28.9988	31.4616
1919	116.688	93.3504	48.0755	64.7618	29.2654	31.7508
1920	115.25	92.2	47.483	63.9637	28.9047	31.3595
1921	116	92.8	47.792	64.38	29.0928	31.5636
1922	116.188	92.9504	47.8695	64.4843	29.1399	31.6148
1923	115.813	92.6504	47.715	64.2762	29.0459	31.5127
1924	115.438	92.3504	47.5605	64.0681	28.9519	31.4107
1925	115.688	92.5504	47.6635	64.2068	29.0145	31.4787
1926	115.609	92.4872	47.6309	64.163	28.9947	31.4572
1927	115.688	92.5504	47.6635	64.2068	29.0145	31.4787
1928	115.625	92.5	47.6375	64.1719	28.9988	31.4616
1929	115.063	92.0504	47.406	63.86	28.8578	31.3086
1930	114.5	91.6	47.174	63.5475	28.7166	31.1554
1931	114.438	91.5504	47.1485	63.5131	28.701	31.1386
1932	115.375	92.3	47.5345	64.0331	28.9361	31.3935
1933	115.5	92.4	47.586	64.1025	28.9674	31.4276
1934	115.438	92.3504	47.5605	64.0681	28.9519	31.4107
1935	115	92	47.38	63.825	28.842	31.2915
1936	115.875	92.7	47.7405	64.3106	29.0615	31.5296
1937	114.75	91.8	47.277	63.6863	28.7793	31.2235
1938	116.188	92.9504	47.8695	64.4843	29.1399	31.6148
1939	115.125	92.1	47.4315	63.8944	28.8733	31.3255
1940	115.563	92.4504	47.612	64.1375	28.9832	31.4447
1941	115.063	92.0504	47.406	63.86	28.8578	31.3086
1942	115.438	92.3504	47.5605	64.0681	28.9519	31.4107
1943	114.813	91.8504	47.303	63.7212	28.7951	31.2406
1944	114.75	91.8	47.277	63.6863	28.7793	31.2235
1945	114.938	91.9504	47.3545	63.7906	28.8265	31.2746
1946	115.063	92.0504	47.406	63.86	28.8578	31.3086
1947	115.438	92.3504	47.5605	64.0681	28.9519	31.4107
1948	114.859	91.8872	47.3219	63.7467	28.8066	31.2531
1949	114.5	91.6	47.174	63.5475	28.7166	31.1554
1950	114.438	91.5504	47.1485	63.5131	28.701	31.1386
1951	114.813	91.8504	47.303	63.7212	28.7951	31.2406
1952	114	91.2	46.968	63.27	28.5912	31.0194
1953	114.563	91.6504	47.2	63.5825	28.7324	31.1726
1954	114.688	91.7504	47.2515	63.6518	28.7638	31.2066
1955	114.734	91.7872	47.2704	63.6774	28.7753	31.2191
1956	115.063	92.0504	47.406	63.86	28.8578	31.3086
1957	114.625	91.7	47.2255	63.6169	28.7479	31.1895
1958	113	90.4	46.556	62.715	28.3404	30.7473
1959	114.5	91.6	47.174	63.5475	28.7166	31.1554
1960	113.313	90.6504	46.685	62.8887	28.4189	30.8325
1961	114.625	91.7	47.2255	63.6169	28.7479	31.1895
1962	114.063	91.2504	46.994	63.305	28.607	31.0365
1963	114.563	91.6504	47.2	63.5825	28.7324	31.1726
1964	115	92	47.38	63.825	28.842	31.2915
1965	114.625	91.7	47.2255	63.6169	28.7479	31.1895
1966	114.5	91.6	47.174	63.5475	28.7166	31.1554
1967	114.188	91.3504	47.0455	63.3743	28.6383	31.0706
1968	114.188	91.3504	47.0455	63.3743	28.6383	31.0706
1969	115.188	92.1504	47.4575	63.9293	28.8892	31.3426
1970	114.563	91.6504	47.2	63.5825	28.7324	31.1726
1971	115.375	92.3	47.5345	64.0331	28.9361	31.3935
1972	115	92	47.38	63.825	28.842	31.2915
1973	114.5	91.6	47.174	63.5475	28.7166	31.1554
1974	114.313	91.4504	47.097	63.4437	28.6697	31.1046
1975	114.875	91.9	47.3285	63.7556	28.8106	31.2575
1976	113.5	90.8	46.762	62.9925	28.4658	30.8834
1977	113.938	91.1504	46.9425	63.2356	28.5756	31.0025
1978	112.875	90.3	46.5045	62.6456	28.309	30.7133
1979	113.563	90.8504	46.788	63.0275	28.4816	30.9005
1980	113.109	90.4872	46.6009	62.7755	28.3677	30.777
1981	112.938	90.3504	46.5305	62.6806	28.3249	30.7304
1982	113.063	90.4504	46.582	62.75	28.3562	30.7644
1983	114.563	91.6504	47.2	63.5825	28.7324	31.1726
1984	113.375	90.7	46.7105	62.9231	28.4344	30.8493
1985	114.5	91.6	47.174	63.5475	28.7166	31.1554
1986	113.875	91.1	46.9165	63.2006	28.5599	30.9854
1987	113.313	90.6504	46.685	62.8887	28.4189	30.8325
1988	114.5	91.6	47.174	63.5475	28.7166	31.1554
1989	113.188	90.5504	46.6335	62.8193	28.3876	30.7984
1990	113.813	91.0504	46.891	63.1662	28.5443	30.9685
1991	113.813	91.0504	46.891	63.1662	28.5443	30.9685
1992	114.25	91.4	47.071	63.4087	28.6539	31.0874
1993	112.063	89.6504	46.17	62.195	28.1054	30.4923
1994	112.813	90.2504	46.479	62.6112	28.2935	30.6964
1995	113.75	91	46.865	63.1313	28.5285	30.9514
[truncated: 1,127 more rows]

## Sheet: Charge Data
Andamento Carica
Time	Voltage	Time	Voltage	Time	Voltage	Time	Voltage	Time	Voltage	Time	Voltage		5x10-1 mol L-1 aqueous solutions
s	V	s	V	s	V	s	V	s	V	s	V
	Methanol		Ethanol		Propanol		Iso-propanol		Iso-Amyl		Sec-Butanol
0	-0.02988	0	-0.0305	0	-0.03288	0	-0.02856	0	-0.01813	0	-0.02988
1	-0.02975	0.1	-0.0305	0.1	-0.03288	1	-0.02856	1	-0.01813	1	-0.02988
2	-0.02944	0.2	-0.0305	0.2	-0.03294	2	-0.02856	2	-0.01813	2	-0.02981
3	-0.02969	0.3	-0.03056	0.3	-0.03294	3	-0.02856	3	-0.01813	3	-0.02981
4	-0.02931	0.4	-0.0305	0.4	-0.03294	4	-0.02856	4	-0.01813	4	-0.02981
5	-0.02919	0.5	-0.0305	0.5	-0.03294	5	-0.02856	5	-0.01813	5	-0.02981
6	-0.02925	0.6	-0.03056	0.6	-0.03294	6	-0.02856	6	-0.01819	6	-0.02981
7	-0.02956	0.7	-0.03056	0.7	-0.03294	7	-0.02856	7	-0.01819	7	-0.02981
8	-0.02944	0.8	-0.0305	0.8	-0.03294	8	-0.02856	8	-0.01819	8	-0.02981
9	-0.02938	0.9	-0.0305	0.9	-0.03294	9	-0.02863	9	-0.01813	9	-0.02981
10	-0.0295	1	-0.03056	1	-0.03294	10	-0.02863	10	-0.01806	10	-0.02981
11	-0.02956	1.1	-0.03056	1.1	-0.03294	11	-0.02863	11	-0.00163	11	-0.02981
12	-0.02981	1.2	-0.03056	1.2	-0.03294	12	-0.02863	12	0.01581	12	-0.02981
13	-0.02963	1.3	-0.03056	1.3	-0.03294	13	-0.0285	13	0.03344	13	-0.02981
14	-0.0305	1.4	-0.03056	1.4	-0.03294	14	-0.023	14	0.05363	14	-0.02981
15	-0.03075	1.5	-0.03056	1.5	-0.03288	15	-0.00456	15	0.07238	15	-0.02981
16	-0.03088	1.6	-0.03056	1.6	-0.03288	16	0.0115	16	0.08675	16	-0.02981
17	-0.03075	1.7	-0.03056	1.7	-0.03294	17	0.02719	17	0.09919	17	-0.02981
18	-0.031	1.8	-0.03056	1.8	-0.03294	18	0.04175	18	0.11	18	-0.02981
19	-0.03106	1.9	-0.03056	1.9	-0.03294	19	0.05556	19	0.11956	19	-0.02981
20	-0.03125	2	-0.03056	2	-0.03294	20	0.06925	20	0.12813	20	-0.02981
21	-0.03088	2.1	-0.03056	2.1	-0.03294	21	0.08213	21	0.13588	21	-0.02975
22	-0.03088	2.2	-0.03056	2.2	-0.03294	22	0.09531	22	0.14275	22	-0.02975
23	-0.03088	2.3	-0.03063	2.3	-0.03294	23	0.10813	23	0.149	23	-0.02975
24	-0.03044	2.4	-0.03056	2.4	-0.03294	24	0.11975	24	0.15463	24	-0.02975
25	-0.0285	2.5	-0.03056	2.5	-0.03294	25	0.12981	25	0.15963	25	-0.02975
26	-0.01938	2.6	-0.03063	2.6	-0.03294	26	0.13875	26	0.16431	26	-0.02975
27	-0.002	2.7	-0.03063	2.7	-0.03294	27	0.14675	27	0.16838	27	-0.02975
28	0.01813	2.8	-0.03063	2.8	-0.03294	28	0.15394	28	0.17213	28	-0.02969
29	0.03788	2.9	-0.03063	2.9	-0.03294	29	0.16044	29	0.17544	29	-0.02969
30	0.05619	3	-0.03063	3	-0.03294	30	0.16631	30	0.17856	30	-0.02969
31	0.07325	3.1	-0.03063	3.1	-0.03294	31	0.17163	31	0.18144	31	-0.02963
32	0.09019	3.2	-0.03063	3.2	-0.03294	32	0.17644	32	0.18413	32	-0.02963
33	0.10619	3.3	-0.03063	3.3	-0.03294	33	0.18081	33	0.18663	33	-0.02956
34	0.12125	3.4	-0.03063	3.4	-0.03294	34	0.18475	34	0.189	34	-0.02956
35	0.13625	3.5	-0.03069	3.5	-0.03294	35	0.1885	35	0.19119	35	-0.0295
36	0.15119	3.6	-0.03069	3.6	-0.03294	36	0.192	36	0.19338	36	-0.02944
37	0.16763	3.7	-0.03063	3.7	-0.03294	37	0.19538	37	0.1955	37	-0.02938
38	0.18269	3.8	-0.03063	3.8	-0.03294	38	0.19856	38	0.19756	38	-0.02931
39	0.20038	3.9	-0.03069	3.9	-0.03294	39	0.20163	39	0.19963	39	-0.02925
40	0.21794	4	-0.03063	4	-0.03294	40	0.20438	40	0.20163	40	-0.02919
41	0.23556	4.1	-0.03069	4.1	-0.03294	41	0.207	41	0.20363	41	-0.02913
42	0.25369	4.2	-0.03069	4.2	-0.03294	42	0.2095	42	0.20563	42	-0.02906
43	0.27175	4.3	-0.03069	4.3	-0.03294	43	0.21188	43	0.20756	43	-0.02906
44	0.28856	4.4	-0.03069	4.4	-0.03294	44	0.21406	44	0.20956	44	-0.029
45	0.30438	4.5	-0.03069	4.5	-0.03294	45	0.21625	45	0.21163	45	-0.02894
46	0.31938	4.6	-0.03069	4.6	-0.03294	46	0.21838	46	0.21363	46	-0.02888
47	0.334	4.7	-0.03069	4.7	-0.03288	47	0.22044	47	0.21569	47	-0.02875
48	0.34844	4.8	-0.03069	4.8	-0.03288	48	0.22244	48	0.21775	48	-0.02856
49	0.36319	4.9	-0.03069	4.9	-0.03294	49	0.22444	49	0.21981	49	-0.02831
50	0.37781	5	-0.03069	5	-0.03294	50	0.22644	50	0.22181	50	-0.02819
51	0.39219	5.1	-0.03069	5.1	-0.03294	51	0.22844	51	0.22388	51	-0.02806
52	0.40631	5.2	-0.03069	5.2	-0.03294	52	0.23031	52	0.22594	52	-0.028
53	0.4205	5.3	-0.03069	5.3	-0.03294	53	0.23238	53	0.22794	53	-0.02788
54	0.43438	5.4	-0.03069	5.4	-0.03294	54	0.23444	54	0.23	54	-0.02763
55	0.44806	5.5	-0.03069	5.5	-0.03294	55	0.23663	55	0.23206	55	-0.02738
56	0.46081	5.6	-0.03069	5.6	-0.03294	56	0.23875	56	0.23406	56	-0.02713
57	0.47375	5.7	-0.03069	5.7	-0.03294	57	0.241	57	0.23613	57	-0.027
58	0.48669	5.8	-0.03069	5.8	-0.03294	58	0.24331	58	0.23813	58	-0.02688
59	0.49838	5.9	-0.03069	5.9	-0.03294	59	0.24581	59	0.24013	59	-0.02656
60	0.51019	6	-0.03069	6	-0.03294	60	0.24838	60	0.24219	60	-0.02619
61	0.522	6.1	-0.03069	6.1	-0.03294	61	0.251	61	0.24419	61	-0.02606
62	0.53212	6.2	-0.03075	6.2	-0.03294	62	0.25375	62	0.24619	62	-0.02588
63	0.5425	6.3	-0.03069	6.3	-0.03288	63	0.25644	63	0.24819	63	-0.02556
64	0.55238	6.4	-0.03069	6.4	-0.03288	64	0.25938	64	0.25019	64	-0.02519
65	0.56125	6.5	-0.03075	6.5	-0.03288	65	0.26244	65	0.25219	65	-0.025
66	0.56981	6.6	-0.03075	6.6	-0.03294	66	0.2655	66	0.25406	66	-0.02475
67	0.57838	6.7	-0.03075	6.7	-0.03294	67	0.26856	67	0.256	67	-0.02425
68	0.58613	6.8	-0.03075	6.8	-0.03294	68	0.27163	68	0.25794	68	-0.02406
69	0.59131	6.9	-0.03075	6.9	-0.03294	69	0.27475	69	0.25994	69	-0.02381
70	0.59856	7	-0.03075	7	-0.03294	70	0.27781	70	0.26188	70	-0.02325
71	0.60481	7.1	-0.03075	7.1	-0.03288	71	0.28088	71	0.26381	71	-0.023
72	0.61144	7.2	-0.03075	7.2	-0.03294	72	0.28388	72	0.26575	72	-0.02269
73	0.61781	7.3	-0.03075	7.3	-0.03288	73	0.28694	73	0.26769	73	-0.02219
74	0.62325	7.4	-0.03075	7.4	-0.03294	74	0.29	74	0.26956	74	-0.022
75	0.62913	7.5	-0.03075	7.5	-0.03294	75	0.293	75	0.27138	75	-0.0215
76	0.6345	7.6	-0.03081	7.6	-0.03294	76	0.296	76	0.27325	76	-0.02106
77	0.63919	7.7	-0.03075	7.7	-0.03294	77	0.29906	77	0.27513	77	-0.02081
78	0.64506	7.8	-0.03081	7.8	-0.03294	78	0.30213	78	0.27706	78	-0.02019
79	0.64969	7.9	-0.03075	7.9	-0.03294	79	0.30513	79	0.27894	79	-0.01994
80	0.65438	8	-0.03075	8	-0.03294	80	0.30813	80	0.28081	80	-0.01938
81	0.65888	8.1	-0.03075	8.1	-0.03294	81	0.31106	81	0.28269	81	-0.019
82	0.66344	8.2	-0.03075	8.2	-0.03294	82	0.31406	82	0.2845	82	-0.01844
83	0.66738	8.3	-0.03075	8.3	-0.03288	83	0.31706	83	0.28631	83	-0.018
84	0.67106	8.4	-0.03075	8.4	-0.03288	84	0.32	84	0.28813	84	-0.0175
85	0.67613	8.5	-0.03069	8.5	-0.03269	85	0.323	85	0.29	85	-0.017
86	0.67925	8.6	-0.0305	8.6	-0.03244	86	0.32594	86	0.29181	86	-0.01644
87	0.68356	8.7	-0.03025	8.7	-0.032	87	0.32888	87	0.29363	87	-0.016
88	0.68694	8.8	-0.03006	8.8	-0.0315	88	0.33181	88	0.29531	88	-0.01525
89	0.69019	8.9	-0.02994	8.9	-0.031	89	0.33469	89	0.29713	89	-0.01488
90	0.69381	9	-0.0295	9	-0.03019	90	0.33769	90	0.29894	90	-0.01413
91	0.69706	9.1	-0.02906	9.1	-0.02944	91	0.34056	91	0.30069	91	-0.01363
92	0.69938	9.2	-0.0285	9.2	-0.02838	92	0.34344	92	0.30238	92	-0.013
93	0.70275	9.3	-0.02775	9.3	-0.02719	93	0.34625	93	0.30413	93	-0.01225
94	0.70494	9.4	-0.02656	9.4	-0.026	94	0.34913	94	0.30594	94	-0.01175
95	0.70856	9.5	-0.025	9.5	-0.02475	95	0.35194	95	0.30763	95	-0.011
96	0.70969	9.6	-0.02306	9.6	-0.02338	96	0.35475	96	0.30931	96	-0.01025
97	0.71275	9.7	-0.021	9.7	-0.02206	97	0.3575	97	0.31106	97	-0.00969
98	0.71569	9.8	-0.01875	9.8	-0.02088	98	0.36019	98	0.31281	98	-0.009
99	0.71806	9.9	-0.01681	9.9	-0.01944	99	0.36294	99	0.31444	99	-0.00813
100	0.72056	10	-0.01469	10	-0.01813	100	0.36563	100	0.31613	100	-0.00744
101	0.72275	10.1	-0.01275	10.1	-0.01694	101	0.36819	101	0.31788	101	-0.00681
102	0.72456	10.2	-0.01081	10.2	-0.0155	102	0.37081	102	0.3195	102	-0.006
103	0.72631	10.3	-0.00888	10.3	-0.01413	103	0.37338	103	0.32113	103	-0.00513
104	0.72838	10.4	-0.007	10.4	-0.01294	104	0.37594	104	0.32281	104	-0.00438
105	0.73006	10.5	-0.00506	10.5	-0.0115	105	0.37844	105	0.32444	105	-0.00369
106	0.73188	10.6	-0.00319	10.6	-0.01013	106	0.38094	106	0.326	106	-0.00294
107	0.73338	10.7	-0.00169	10.7	-0.00881	107	0.38338	107	0.32769	107	-0.00206
108	0.73513	10.8	6.25e-05	10.8	-0.00731	108	0.38581	108	0.32925	108	-0.00125
109	0.73663	10.9	0.00188	10.9	-0.00606	109	0.38819	109	0.33094	109	-0.0004375
110	0.73788	11	0.00356	11	-0.00469	110	0.39063	110	0.3325	110	0.000375
111	0.73931	11.1	0.00513	11.1	-0.00325	111	0.393	111	0.33406	111	0.00119
112	0.74038	11.2	0.00694	11.2	-0.002	112	0.39531	112	0.33569	112	0.00206
113	0.74181	11.3	0.00863	11.3	-0.0005625	113	0.39756	113	0.33719	113	0.003
114	0.74263	11.4	0.01038	11.4	0.0008125	114	0.39981	114	0.33881	114	0.00394
115	0.7435	11.5	0.01206	11.5	0.00206	115	0.402	115	0.34031	115	0.00488
116	0.74425	11.6	0.01388	11.6	0.0035	116	0.40413	116	0.34194	116	0.00581
117	0.74525	11.7	0.0155	11.7	0.00488	117	0.40631	117	0.3435	117	0.00675
118	0.74638	11.8	0.01719	11.8	0.00606	118	0.4085	118	0.345	118	0.00769
119	0.74719	11.9	0.01894	11.9	0.00738	119	0.41063	119	0.34663	119	0.00869
120	0.74694	12	0.02063	12	0.00869	120	0.41269	120	0.34806	120	0.00963
121	0.74763	12.1	0.02219	12.1	0.00994	121	0.41475	121	0.34963	121	0.01063
122	0.74769	12.2	0.02394	12.2	0.01113	122	0.41681	122	0.35106	122	0.01163
123	0.74794	12.3	0.02563	12.3	0.0125	123	0.41888	123	0.35269	123	0.01263
124	0.74819	12.4	0.02719	12.4	0.01381	124	0.42088	124	0.35406	124	0.01363
125	0.749	12.5	0.02888	12.5	0.015	125	0.42288	125	0.35563	125	0.01456
126	0.74875	12.6	0.0305	12.6	0.01625	126	0.42481	126	0.35706	126	0.01563
127	0.74869	12.7	0.03206	12.7	0.01756	127	0.42675	127	0.35856	127	0.01675
128	0.748	12.8	0.03369	12.8	0.01888	128	0.42869	128	0.36	128	0.01781
129	0.74731	12.9	0.03525	12.9	0.02019	129	0.4305	129	0.3615	129	0.01881
130	0.74731	13	0.037	13	0.02156	130	0.43238	130	0.36294	130	0.01988
131	0.74713	13.1	0.03875	13.1	0.023	131	0.43425	131	0.36438	131	0.02094
132	0.74713	13.2	0.04038	13.2	0.02438	132	0.43613	132	0.36581	132	0.022
133	0.74625	13.3	0.04206	13.3	0.02594	133	0.438	133	0.36713	133	0.023
134	0.74519	13.4	0.04381	13.4	0.02731	134	0.43981	134	0.36863	134	0.02406
135	0.74425	13.5	0.04531	13.5	0.02881	135	0.44163	135	0.37	135	0.02519
136	0.74356	13.6	0.04694	13.6	0.03013	136	0.44338	136	0.37144	136	0.02625
137	0.74269	13.7	0.04863	13.7	0.03163	137	0.44513	137	0.37288	137	0.02744
138	0.74181	13.8	0.05013	13.8	0.033	138	0.44688	138	0.37419	138	0.02856
139	0.74075	13.9	0.05175	13.9	0.03431	139	0.44869	139	0.37569	139	0.02975
140	0.73956	14	0.05325	14	0.03575	140	0.45031	140	0.377	140	0.03081
141	0.738	14.1	0.05488	14.1	0.037	141	0.45206	141	0.37838	141	0.03194
142	0.737	14.2	0.05644	14.2	0.03825	142	0.45381	142	0.37981	142	0.033
143	0.73613	14.3	0.05794	14.3	0.03969	143	0.4555	143	0.38113	143	0.03406
144	0.73481	14.4	0.05944	14.4	0.041	144	0.45713	144	0.3825	144	0.03519
145	0.73206	14.5	0.061	14.5	0.04219	145	0.45888	145	0.38388	145	0.03631
146	0.731	14.6	0.06256	14.6	0.04363	146	0.4605	146	0.38513	146	0.0375
147	0.73	14.7	0.064	14.7	0.04494	147	0.46206	147	0.38656	147	0.03869
148	0.72925	14.8	0.06569	14.8	0.04606	148	0.46375	148	0.38788	148	0.03981
149	0.72844	14.9	0.06719	14.9	0.04731	149	0.46531	149	0.38919	149	0.04088
150	0.72694	15	0.06881	15	0.04863	150	0.46694	150	0.39056	150	0.042
151	0.726	15.1	0.0705	15.1	0.04981	151	0.46856	151	0.39188	151	0.04306
152	0.72444	15.2	0.07238	15.2	0.05094	152	0.47006	152	0.39313	152	0.04419
153	0.7225	15.3	0.07419	15.3	0.05206	153	0.47175	153	0.3945	153	0.04531
154	0.72119	15.4	0.07606	15.4	0.05319	154	0.47325	154	0.39581	154	0.04644
155	0.72019	15.5	0.07806	15.5	0.05431	155	0.47488	155	0.39706	155	0.04763
156	0.718	15.6	0.08006	15.6	0.0555	156	0.47638	156	0.39831	156	0.04875
157	0.71669	15.7	0.08231	15.7	0.05656	157	0.47794	157	0.39969	157	0.04988
158	0.71463	15.8	0.08431	15.8	0.05769	158	0.4795	158	0.40094	158	0.05094
159	0.71244	15.9	0.08638	15.9	0.05881	159	0.481	159	0.40219	159	0.052
160	0.71075	16	0.08844	16	0.05981	160	0.48256	160	0.4035	160	0.05306
161	0.709	16.1	0.09069	16.1	0.06088	161	0.484	161	0.40481	161	0.05419
162	0.70756	16.2	0.09306	16.2	0.06188	162	0.48556	162	0.406	162	0.05531
163	0.70588	16.3	0.09531	16.3	0.06288	163	0.487	163	0.40725	163	0.05644
164	0.70419	16.4	0.09744	16.4	0.06388	164	0.48856	164	0.40856	164	0.05763
165	0.7025	16.5	0.0995	16.5	0.06488	165	0.49	165	0.40988	165	0.05875
166	0.70075	16.6	0.10144	16.6	0.06588	166	0.4915	166	0.41106	166	0.05981
167	0.69913	16.7	0.10338	16.7	0.06688	167	0.49294	167	0.41231	167	0.06088
168	0.69819	16.8	0.10519	16.8	0.06781	168	0.49431	168	0.41363	168	0.06194
169	0.69619	16.9	0.10706	16.9	0.06881	169	0.49588	169	0.41488	169	0.063
170	0.69463	17	0.10888	17	0.06975	170	0.49719	170	0.416	170	0.06406
171	0.69244	17.1	0.11063	17.1	0.07069	171	0.49875	171	0.41725	171	0.06513
172	0.69113	17.2	0.11244	17.2	0.07156	172	0.50006	172	0.41856	172	0.06619
173	0.68969	17.3	0.11419	17.3	0.07244	173	0.50163	173	0.41981	173	0.06731
174	0.6875	17.4	0.116	17.4	0.07338	174	0.50294	174	0.42094	174	0.06838
175	0.68569	17.5	0.11775	17.5	0.07419	175	0.50438	175	0.42213	175	0.0695
176	0.684	17.6	0.11944	17.6	0.07506	176	0.50588	176	0.42338	176	0.07056
177	0.68256	17.7	0.12131	17.7	0.076	177	0.50713	177	0.42463	177	0.07163
178	0.68156	17.8	0.12306	17.8	0.07694	178	0.50863	178	0.42588	178	0.07275
179	0.68094	17.9	0.12488	17.9	0.07788	179	0.50994	179	0.427	179	0.07381
180	0.67956	18	0.12669	18	0.07869	180	0.51113	180	0.42813	180	0.07481
181	0.67844	18.1	0.12825	18.1	0.07956	181	0.51256	181	0.42938	181	0.07588
182	0.67719	18.2	0.13006	18.2	0.08031	182	0.51394	182	0.43056	182	0.07694
183	0.67619	18.3	0.13175	18.3	0.08113	183	0.51525	183	0.43175	183	0.07794
184	0.67425	18.4	0.13338	18.4	0.082	184	0.51669	184	0.43294	184	0.07894
185	0.67331	18.5	0.13506	18.5	0.08288	185	0.518	185	0.43406	185	0.07994
186	0.67188	18.6	0.13675	18.6	0.08375	186	0.51931	186	0.43525	186	0.081
187	0.6705	18.7	0.13838	18.7	0.0845	187	0.52075	187	0.43644	187	0.082
188	0.66956	18.8	0.14	18.8	0.08525	188	0.522	188	0.43769	188	0.083
189	0.66863	18.9	0.14169	18.9	0.086	189	0.52338	189	0.43881	189	0.084
190	0.66681	19	0.14319	19	0.08694	190	0.52475	190	0.43994	190	0.085
191	0.66669	19.1	0.14488	19.1	0.08781	191	0.526	191	0.44106	191	0.086
192	0.66488	19.2	0.14644	19.2	0.0885	192	0.52725	192	0.44219	192	0.08706
193	0.66331	19.3	0.148	19.3	0.08913	193	0.52869	193	0.44338	193	0.08806
194	0.66263	19.4	0.14969	19.4	0.09	194	0.52994	194	0.44463	194	0.08913
195	0.66156	19.5	0.15119	19.5	0.09088	195	0.53119	195	0.44575	195	0.09019
196	0.6605	19.6	0.15275	19.6	0.09156	196	0.53256	196	0.44688	196	0.09125
197	0.65925	19.7	0.15425	19.7	0.09219	197	0.53388	197	0.44794	197	0.09225
198	0.65781	19.8	0.15588	19.8	0.093	198	0.53513	198	0.44906	198	0.09331
199	0.65719	19.9	0.15744	19.9	0.09381	199	0.53644	199	0.45019	199	0.09431
200	0.65594	20	0.15894	20	0.09456	200	0.53781	200	0.45138	200	0.09531
201	0.65506	20.1	0.16044	20.1	0.09519	201	0.539	201	0.4525	201	0.09638
202	0.65425	20.2	0.16194	20.2	0.09594	202	0.54025	202	0.45369	202	0.09738
203	0.65331	20.3	0.1635	20.3	0.09675	203	0.54163	203	0.45481	203	0.09838
204	0.65169	20.4	0.165	20.4	0.09738	204	0.54288	204	0.45588	204	0.09938
205	0.6505	20.5	0.16644	20.5	0.09806	205	0.54406	205	0.457	205	0.10044
206	0.64931	20.6	0.16794	20.6	0.09888	206	0.54538	206	0.45806	206	0.10144
207	0.64863	20.7	0.16931	20.7	0.0995	207	0.54675	207	0.45919	207	0.10244
208	0.64706	20.8	0.17088	20.8	0.10013	208	0.54794	208	0.46025	208	0.1035
209	0.64613	20.9	0.17225	20.9	0.10094	209	0.54913	209	0.46144	209	0.1045
210	0.64531	21	0.17381	21	0.10163	210	0.55038	210	0.4625	210	0.10556
211	0.64425	21.1	0.17513	21.1	0.10219	211	0.55175	211	0.46363	211	0.1065
212	0.64319	21.2	0.17663	21.2	0.10294	212	0.55294	212	0.46469	212	0.1075
213	0.64263	21.3	0.178	21.3	0.10369	213	0.55413	213	0.46581	213	0.10856
214	0.64156	21.4	0.17944	21.4	0.10419	214	0.55538	214	0.46688	214	0.10956
215	0.64056	21.5	0.18088	21.5	0.10494	215	0.55669	215	0.46794	215	0.11044
216	0.64075	21.6	0.18219	21.6	0.10563	216	0.55788	216	0.469	216	0.11144
217	0.63975	21.7	0.18363	21.7	0.10613	217	0.559	217	0.47006	217	0.11244
218	0.63938	21.8	0.185	21.8	0.10688	218	0.56025	218	0.47113	218	0.11338
219	0.63819	21.9	0.18638	21.9	0.1075	219	0.5615	219	0.47219	219	0.11438
220	0.637	22	0.18781	22	0.10806	220	0.56275	220	0.47331	220	0.11538
221	0.63644	22.1	0.18913	22.1	0.10888	221	0.56394	221	0.47438	221	0.11631
222	0.63575	22.2	0.1905	22.2	0.10931	222	0.56513	222	0.4755	222	0.11731
223	0.63506	22.3	0.19181	22.3	0.11	223	0.56631	223	0.47656	223	0.11825
224	0.634	22.4	0.19313	22.4	0.11056	224	0.56763	224	0.47763	224	0.11925
225	0.6325	22.5	0.1945	22.5	0.11113	225	0.56881	225	0.47869	225	0.12019
226	0.63231	22.6	0.19588	22.6	0.11181	226	0.57	226	0.47975	226	0.12119
227	0.63163	22.7	0.19713	22.7	0.11238	227	0.57113	227	0.48081	227	0.12213
228	0.63063	22.8	0.1985	22.8	0.11294	228	0.57237	228	0.48188	228	0.12313
229	0.63025	22.9	0.19988	22.9	0.11363	229	0.57363	229	0.48294	229	0.12406
230	0.62925	23	0.20106	23	0.11406	230	0.57481	230	0.48394	230	0.12506
231	0.62856	23.1	0.20238	23.1	0.11481	231	0.57594	231	0.485	231	0.126
232	0.62694	23.2	0.20381	23.2	0.11531	232	0.57713	232	0.486	232	0.127
233	0.62656	23.3	0.20506	23.3	0.11594	233	0.57831	233	0.487	233	0.12794
234	0.62581	23.4	0.20619	23.4	0.1165	234	0.57956	234	0.48806	234	0.12894
235	0.62481	23.5	0.20756	23.5	0.117	235	0.58075	235	0.48906	235	0.12988
236	0.62388	23.6	0.20881	23.6	0.11769	236	0.58194	236	0.49013	236	0.13088
237	0.62306	23.7	0.21006	23.7	0.11806	237	0.58306	237	0.49113	237	0.13181
238	0.62231	23.8	0.21131	23.8	0.11881	238	0.58419	238	0.49219	238	0.13275
239	0.62206	23.9	0.21269	23.9	0.11925	239	0.58544	239	0.49319	239	0.13375
240	0.62181	24	0.21388	24	0.11988	240	0.58663	240	0.49419	240	0.13469
241	0.62138	24.1	0.21506	24.1	0.12031	241	0.58781	241	0.49519	241	0.13556
242	0.62056	24.2	0.21631	24.2	0.12094	242	0.58894	242	0.49619	242	0.1365
243	0.61975	24.3	0.21763	24.3	0.12144	243	0.59006	243	0.49725	243	0.13738
244	0.61925	24.4	0.21881	24.4	0.12194	244	0.59119	244	0.49825	244	0.13825
245	0.61856	24.5	0.22	24.5	0.12244	245	0.59231	245	0.49925	245	0.13919
246	0.61813	24.6	0.22119	24.6	0.123	246	0.59356	246	0.50025	246	0.14013
247	0.61781	24.7	0.22238	24.7	0.12356	247	0.59475	247	0.50125	247	0.14106
248	0.617	24.8	0.22375	24.8	0.124	248	0.59588	248	0.50225	248	0.142
249	0.61656	24.9	0.22488	24.9	0.12463	249	0.597	249	0.50325	249	0.14294
250	0.61613	25	0.226	25	0.12506	250	0.59813	250	0.50425	250	0.14388
251	0.61581	25.1	0.22719	25.1	0.12569	251	0.59925	251	0.50525	251	0.14481
252	0.61538	25.2	0.22838	25.2	0.126	252	0.60044	252	0.50619	252	0.14575
253	0.615	25.3	0.22963	25.3	0.12663	253	0.60163	253	0.50719	253	0.14656
254	0.61463	25.4	0.23081	25.4	0.127	254	0.60275	254	0.50819	254	0.14744
255	0.61419	25.5	0.23194	25.5	0.12763	255	0.60394	255	0.50919	255	0.14825
256	0.61375	25.6	0.23313	25.6	0.128	256	0.60506	256	0.51	256	0.14913
257	0.61319	25.7	0.23425	25.7	0.12863	257	0.60613	257	0.511	257	0.15006
258	0.61294	25.8	0.23538	25.8	0.12906	258	0.60725	258	0.51194	258	0.151
259	0.6125	25.9	0.23663	25.9	0.1295	259	0.60838	259	0.51294	259	0.15194
260	0.61231	26	0.23781	26	0.13	260	0.60956	260	0.51394	260	0.15281
261	0.61206	26.1	0.23888	26.1	0.1305	261	0.61069	261	0.51487	261	0.15369
262	0.612	26.2	0.24	26.2	0.131	262	0.61181	262	0.51588	262	0.15444
263	0.61181	26.3	0.24106	26.3	0.13144	263	0.61294	263	0.51681	263	0.15525
264	0.61113	26.4	0.24219	26.4	0.13194	264	0.614	264	0.51781	264	0.15613
265	0.61075	26.5	0.24338	26.5	0.13238	265	0.61506	265	0.51875	265	0.157
266	0.61038	26.6	0.2445	26.6	0.13288	266	0.61619	266	0.51969	266	0.15794
267	0.60981	26.7	0.24569	26.7	0.13325	267	0.61731	267	0.52062	267	0.15881
268	0.60956	26.8	0.24675	26.8	0.13388	268	0.61844	268	0.52156	268	0.15969
269	0.60906	26.9	0.24788	26.9	0.13419	269	0.61963	269	0.5225	269	0.16044
270	0.60869	27	0.24888	27	0.13475	270	0.62069	270	0.52344	270	0.16125
271	0.6075	27.1	0.25	27.1	0.13506	271	0.62188	271	0.52438	271	0.16206
272	0.60869	27.2	0.25106	27.2	0.13569	272	0.62294	272	0.52531	272	0.163
273	0.60875	27.3	0.25213	27.3	0.136	273	0.624	273	0.52619	273	0.16388
274	0.60906	27.4	0.25319	27.4	0.1365	274	0.62506	274	0.52713	274	0.16475
275	0.60788	27.5	0.25413	27.5	0.13694	275	0.62613	275	0.52806	275	0.1655
276	0.60719	27.6	0.25519	27.6	0.13738	276	0.62719	276	0.529	276	0.16625
277	0.60769	27.7	0.25631	27.7	0.13788	277	0.62831	277	0.52994	277	0.16706
278	0.60681	27.8	0.25731	27.8	0.13819	278	0.62938	278	0.53088	278	0.16794
279	0.60731	27.9	0.25844	27.9	0.13875	279	0.6305	279	0.53181	279	0.16888
280	0.60594	28	0.2595	28	0.13906	280	0.63163	280	0.53275	280	0.16963
281	0.60575	28.1	0.26063	28.1	0.13963	281	0.63269	281	0.53363	281	0.17031
282	0.60606	28.2	0.26169	28.2	0.13994	282	0.63381	282	0.5345	282	0.17113
283	0.60563	28.3	0.26275	28.3	0.14038	283	0.63488	283	0.53537	283	0.172
284	0.60563	28.4	0.26375	28.4	0.14088	284	0.63588	284	0.53631	284	0.17288
285	0.60569	28.5	0.26475	28.5	0.14113	285	0.63694	285	0.53719	285	0.17363
286	0.6055	28.6	0.26581	28.6	0.14169	286	0.638	286	0.53806	286	0.17425
287	0.60556	28.7	0.26681	28.7	0.142	287	0.639	287	0.539	287	0.17506
288	0.60575	28.8	0.26781	28.8	0.1425	288	0.64006	288	0.53994	288	0.17594
289	0.60525	28.9	0.26888	28.9	0.14294	289	0.64106	289	0.54088	289	0.17675
290	0.60525	29	0.26981	29	0.14319	290	0.64213	290	0.54175	290	0.17744
291	0.60519	29.1	0.27081	29.1	0.14375	291	0.64319	291	0.54263	291	0.17813
292	0.605	29.2	0.27181	29.2	0.144	292	0.64425	292	0.5435	292	0.179
293	0.60506	29.3	0.27281	29.3	0.14444	293	0.64531	293	0.54431	293	0.17981
294	0.60438	29.4	0.27381	29.4	0.14494	294	0.64638	294	0.54519	294	0.1805
295	0.60362	29.5	0.27481	29.5	0.14519	295	0.64744	295	0.54606	295	0.18119
296	0.60444	29.6	0.27575	29.6	0.14575	296	0.6485	296	0.547	296	0.182
297	0.60394	29.7	0.27675	29.7	0.146	297	0.64956	297	0.54788	297	0.18281
298	0.60356	29.8	0.27775	29.8	0.1465	298	0.65056	298	0.54881	298	0.1835
299	0.60344	29.9	0.27875	29.9	0.14688	299	0.65163	299	0.54969	299	0.18413
300	0.60375	30	0.27969	30	0.14713	300	0.65269	300	0.5505	300	0.18494
301	0.60362	30.1	0.28069	30.1	0.14769	301	0.65369	301	0.55131	301	0.18581
302	0.60362	30.2	0.28163	30.2	0.148	302	0.65469	302	0.55213	302	0.18638
303	0.60331	30.3	0.28256	30.3	0.14838	303	0.65569	303	0.55306	303	0.18706
304	0.60313	30.4	0.28356	30.4	0.14888	304	0.65669	304	0.55394	304	0.18794
305	0.6035	30.5	0.2845	30.5	0.14906	305	0.65775	305	0.55481	305	0.18863
306	0.60338	30.6	0.28538	30.6	0.1495	306	0.65875	306	0.55563	306	0.18925
307	0.60356	30.7	0.28631	30.7	0.14994	307	0.65975	307	0.5565	307	0.19
308	0.60263	30.8	0.28725	30.8	0.15025	308	0.66075	308	0.55725	308	0.19081
309	0.603	30.9	0.28813	30.9	0.15069	309	0.66175	309	0.55806	309	0.19138
310	0.60281	31	0.28906	31	0.151	310	0.66275	310	0.55894	310	0.19206
311	0.60263	31.1	0.29006	31.1	0.15138	311	0.66375	311	0.55981	311	0.19288
312	0.60294	31.2	0.29094	31.2	0.15181	312	0.66475	312	0.56063	312	0.1935
313	0.60281	31.3	0.29188	31.3	0.15206	313	0.66569	313	0.56144	313	0.19413
314	0.60156	31.4	0.29281	31.4	0.1525	314	0.66669	314	0.56225	314	0.19494
315	0.60188	31.5	0.29369	31.5	0.15288	315	0.66769	315	0.56306	315	0.19556
316	0.60138	31.6	0.29463	31.6	0.15313	316	0.66863	316	0.56394	316	0.19613
317	0.60119	31.7	0.2955	31.7	0.15363	317	0.66963	317	0.56481	317	0.19694
318	0.601	31.8	0.29638	31.8	0.15394	318	0.67056	318	0.56556	318	0.19763
319	0.60088	31.9	0.29719	31.9	0.15419	319	0.67156	319	0.56631	319	0.19813
320	0.60088	32	0.29813	32	0.15469	320	0.6725	320	0.56713	320	0.19894
321	0.60069	32.1	0.29906	32.1	0.15494	321	0.67344	321	0.568	321	0.19956
322	0.60038	32.2	0.29994	32.2	0.15519	322	0.67438	322	0.56888	322	0.20013
323	0.60031	32.3	0.30088	32.3	0.15575	323	0.67531	323	0.56963	323	0.20088
324	0.60044	32.4	0.30169	32.4	0.15594	324	0.67625	324	0.57038	324	0.2015
325	0.60094	32.5	0.30256	32.5	0.15631	325	0.67719	325	0.57119	325	0.20206
326	0.60256	32.6	0.30331	32.6	0.15675	326	0.67813	326	0.572	326	0.20281
327	0.601	32.7	0.30419	32.7	0.157	327	0.67906	327	0.57288	327	0.20338
328	0.60056	32.8	0.30506	32.8	0.15731	328	0.68006	328	0.57363	328	0.204
329	0.59969	32.9	0.30594	32.9	0.15775	329	0.681	329	0.57438	329	0.20475
330	0.59969	33	0.30688	33	0.158	330	0.68194	330	0.57513	330	0.20519
331	0.60013	33.1	0.30769	33.1	0.15838	331	0.68288	331	0.57594	331	0.20594
332	0.60056	33.2	0.3085	33.2	0.15881	332	0.68381	332	0.57675	332	0.2065
333	0.60056	33.3	0.30931	33.3	0.159	333	0.68475	333	0.5775	333	0.20706
334	0.60038	33.4	0.31006	33.4	0.15931	334	0.68563	334	0.57825	334	0.20781
335	0.60013	33.5	0.311	33.5	0.15975	335	0.68644	335	0.579	335	0.20825
336	0.60044	33.6	0.31188	33.6	0.16	336	0.68731	336	0.57981	336	0.20894
337	0.6	33.7	0.31275	33.7	0.16038	337	0.68819	337	0.58063	337	0.20956
338	0.59975	33.8	0.3135	33.8	0.16081	338	0.68913	338	0.58131	338	0.21006
339	0.60025	33.9	0.31431	33.9	0.161	339	0.69006	339	0.58206	339	0.21081
340	0.59988	34	0.31513	34	0.16125	340	0.69094	340	0.58288	340	0.21125
341	0.59981	34.1	0.316	34.1	0.16175	341	0.69188	341	0.58369	341	0.21194
342	0.60019	34.2	0.31688	34.2	0.162	342	0.69281	342	0.58438	342	0.21256
343	0.59975	34.3	0.31763	34.3	0.16231	343	0.69369	343	0.58506	343	0.21306
344	0.59963	34.4	0.31844	34.4	0.16275	344	0.6945	344	0.58588	344	0.21381
345	0.59956	34.5	0.31913	34.5	0.16294	345	0.69531	345	0.58669	345	0.21419
346	0.5995	34.6	0.32	34.6	0.16319	346	0.69619	346	0.58738	346	0.21494
347	0.59969	34.7	0.32088	34.7	0.16369	347	0.69706	347	0.58806	347	0.21544
348	0.59994	34.8	0.32163	34.8	0.16394	348	0.698	348	0.58888	348	0.216
349	0.59981	34.9	0.32238	34.9	0.16413	349	0.69888	349	0.58963	349	0.21663
350	0.59944	35	0.32319	35	0.16463	350	0.69975	350	0.59025	350	0.21706
351	0.59906	35.1	0.324	35.1	0.16488	351	0.70056	351	0.591	351	0.21781
352	0.59906	35.2	0.32488	35.2	0.16513	352	0.70138	352	0.59181	352	0.21819
353	0.59863	35.3	0.32569	35.3	0.16563	353	0.70213	353	0.5925	353	0.21894
354	0.59931	35.4	0.32638	35.4	0.16588	354	0.703	354	0.59319	354	0.21938
355	0.59906	35.5	0.32713	35.5	0.16613	355	0.70388	355	0.59394	355	0.21994
356	0.59894	35.6	0.32794	35.6	0.1665	356	0.70475	356	0.59469	356	0.22056
357	0.59931	35.7	0.32881	35.7	0.16688	357	0.7055	357	0.59531	357	0.221
358	0.59931	35.8	0.32956	35.8	0.167	358	0.70631	358	0.59606	358	0.22175
359	0.59938	35.9	0.33019	35.9	0.16738	359	0.70706	359	0.59681	359	0.22213
360	0.59944	36	0.331	36	0.16781	360	0.70794	360	0.5975	360	0.22281
361	0.59956	36.1	0.33188	36.1	0.168	361	0.70881	361	0.59813	361	0.22319
362	0.59938	36.2	0.33269	36.2	0.16831	362	0.70956	362	0.59894	362	0.22388
363	0.59938	36.3	0.33331	36.3	0.16875	363	0.71031	363	0.59963	363	0.22431
364	0.59963	36.4	0.334	36.4	0.16894	364	0.71106	364	0.60025	364	0.22494
365	0.5995	36.5	0.33488	36.5	0.16919	365	0.71194	365	0.601	365	0.2255
366	0.59956	36.6	0.33563	36.6	0.16969	366	0.71275	366	0.60175	366	0.226
367	0.59944	36.7	0.33631	36.7	0.16988	367	0.71356	367	0.60238	367	0.22663
368	0.5995	36.8	0.33706	36.8	0.17013	368	0.71425	368	0.60306	368	0.227
369	0.59956	36.9	0.33788	36.9	0.17038	369	0.71506	369	0.60381	369	0.22769
370	0.5995	37	0.33863	37	0.17088	370	0.71588	370	0.60444	370	0.22806
371	0.59956	37.1	0.33931	37.1	0.171	371	0.71669	371	0.60506	371	0.22875
372	0.5995	37.2	0.34006	37.2	0.17125	372	0.71738	372	0.60588	372	0.22913
373	0.5995	37.3	0.34088	37.3	0.17175	373	0.71806	373	0.6065	373	0.22981
374	0.5995	37.4	0.34163	37.4	0.17194	374	0.71894	374	0.60713	374	0.23019
375	0.5995	37.5	0.34225	37.5	0.17213	375	0.71969	375	0.60788	375	0.23088
376	0.59938	37.6	0.34306	37.6	0.1725	376	0.72038	376	0.6085	376	0.23125
377	0.59944	37.7	0.34388	37.7	0.17288	377	0.72113	377	0.60913	377	0.23188
378	0.59938	37.8	0.34456	37.8	0.173	378	0.72194	378	0.60988	378	0.23231
379	0.59944	37.9	0.34525	37.9	0.17331	379	0.72269	379	0.6105	379	0.23294
380	0.59944	38	0.346	38	0.17375	380	0.72338	380	0.61113	380	0.23331
381	0.59938	38.1	0.34681	38.1	0.17394	381	0.72406	381	0.61188	381	0.23394
382	0.59938	38.2	0.3475	38.2	0.17406	382	0.72494	382	0.61244	382	0.23438
383	0.59931	38.3	0.34813	38.3	0.17444	383	0.72569	383	0.61306	383	0.23494
384	0.59938	38.4	0.34894	38.4	0.17488	384	0.72631	384	0.61381	384	0.23544
385	0.59938	38.5	0.34969	38.5	0.175	385	0.727	385	0.61438	385	0.23594
386	0.59944	38.6	0.35038	38.6	0.17519	386	0.72788	386	0.615	386	0.23644
387	0.59944	38.7	0.35106	38.7	0.17569	387	0.72856	387	0.61575	387	0.23694
388	0.5995	38.8	0.35188	38.8	0.17594	388	0.72919	388	0.61631	388	0.23744
389	0.5995	38.9	0.3525	38.9	0.17613	389	0.72994	389	0.61694	389	0.23794
390	0.5995	39	0.35319	39	0.17644	390	0.73075	390	0.61763	390	0.23838
391	0.5995	39.1	0.35394	39.1	0.17681	391	0.73131	391	0.61819	391	0.23894
392	0.5995	39.2	0.35469	39.2	0.17694	392	0.73206	392	0.61888	392	0.23938
393	0.5995	39.3	0.35531	39.3	0.17719	393	0.73281	393	0.6195	393	0.23994
394	0.59944	39.4	0.35606	39.4	0.17763	394	0.7335	394	0.62006	394	0.24038
395	0.59944	39.5	0.35681	39.5	0.17788	395	0.73413	395	0.62081	395	0.24094
396	0.59938	39.6	0.3575	39.6	0.17806	396	0.73488	396	0.62131	396	0.24138
397	0.59931	39.7	0.35819	39.7	0.17831	397	0.73556	397	0.62194	397	0.24194
398	0.59931	39.8	0.35894	39.8	0.17875	398	0.73619	398	0.62256	398	0.24238
399	0.59931	39.9	0.35969	39.9	0.17894	399	0.73694	399	0.62313	399	0.24294
400	0.59931	40	0.36031	40	0.17913	400	0.73769	400	0.62381	400	0.24338
401	0.59925	40.1	0.36106	40.1	0.17944	401	0.73825	401	0.62438	401	0.24394
402	0.59925	40.2	0.36181	40.2	0.17981	402	0.73894	402	0.625	402	0.24431
403	0.59925	40.3	0.3625	40.3	0.17994	403	0.73969	403	0.62563	403	0.24494
404	0.59925	40.4	0.36313	40.4	0.18019	404	0.74025	404	0.62613	404	0.24531
405	0.59919	40.5	0.36388	40.5	0.18056	405	0.741	405	0.62681	405	0.24588
406	0.59919	40.6	0.36469	40.6	0.18088	406	0.74169	406	0.62738	406	0.24625
407	0.59919	40.7	0.36525	40.7	0.181	407	0.74225	407	0.628	407	0.24688
408	0.59919	40.8	0.36594	40.8	0.18119	408	0.74294	408	0.62863	408	0.24725
409	0.59919	40.9	0.36675	40.9	0.18163	409	0.74369	409	0.62913	409	0.24788
410	0.59919	41	0.36725	41	0.18188	410	0.74419	410	0.62981	410	0.24819
411	0.59913	41.1	0.368	41.1	0.182	411	0.74494	411	0.63031	411	0.24881
412	0.59919	41.2	0.36881	41.2	0.18225	412	0.74563	412	0.63094	412	0.24913
413	0.59913	41.3	0.36944	41.3	0.18263	413	0.74619	413	0.6315	413	0.24981
414	0.59919	41.4	0.37006	41.4	0.18294	414	0.74694	414	0.63206	414	0.25013
415	0.59913	41.5	0.37088	41.5	0.18306	415	0.74756	415	0.63269	415	0.25075
416	0.59913	41.6	0.37156	41.6	0.18331	416	0.74813	416	0.63319	416	0.25106
417	0.59906	41.7	0.37213	41.7	0.18369	417	0.74888	417	0.63388	417	0.25169
418	0.59906	41.8	0.37294	41.8	0.18394	418	0.74944	418	0.63438	418	0.252
419	0.599	41.9	0.37369	41.9	0.18406	419	0.75	419	0.63494	419	0.25263
420	0.599	42	0.37419	42	0.18438	420	0.75069	420	0.6355	420	0.253
421	0.59906	42.1	0.37494	42.1	0.18475	421	0.75119	421	0.63606	421	0.25356
422	0.59906	42.2	0.37563	42.2	0.18494	422	0.75194	422	0.63669	422	0.25394
423	0.59906	42.3	0.37619	42.3	0.18506	423	0.7525	423	0.63713	423	0.25425
424	0.59906	42.4	0.377	42.4	0.18538	424	0.75306	424	0.63781	424	0.25488
425	0.59913	42.5	0.37769	42.5	0.18575	425	0.75381	425	0.63825	425	0.25513
426	0.59913	42.6	0.37825	42.6	0.18594	426	0.75431	426	0.63888	426	0.25581
427	0.59913	42.7	0.379	42.7	0.18606	427	0.75494	427	0.63931	427	0.25613
428	0.59913	42.8	0.37975	42.8	0.18644	428	0.75563	428	0.63994	428	0.25675
429	0.59913	42.9	0.38038	42.9	0.18675	429	0.75613	429	0.6405	429	0.25706
430	0.59913	43	0.381	43	0.18694	430	0.75688	430	0.641	430	0.25763
431	0.59906	43.1	0.38181	43.1	0.18706	431	0.75738	431	0.64156	431	0.258
432	0.59919	43.2	0.38231	43.2	0.18744	432	0.758	432	0.64206	432	0.25856
433	0.59913	43.3	0.383	43.3	0.18775	433	0.75863	433	0.64269	433	0.259
434	0.59919	43.4	0.38369	43.4	0.18794	434	0.75913	434	0.64313	434	0.25944
435	0.59913	43.5	0.38431	43.5	0.18813	435	0.75981	435	0.64375	435	0.25994
436	0.59919	43.6	0.385	43.6	0.1885	436	0.76038	436	0.64419	436	0.26031
437	0.59919	43.7	0.38575	43.7	0.18881	437	0.76094	437	0.64481	437	0.26088
438	0.59919	43.8	0.38631	43.8	0.18894	438	0.76163	438	0.64525	438	0.26125
439	0.59919	43.9	0.387	43.9	0.18913	439	0.76206	439	0.64588	439	0.26188
440	0.59919	44	0.38775	44	0.18944	440	0.76275	440	0.64631	440	0.26213
441	0.59919	44.1	0.38831	44.1	0.18975	441	0.76325	441	0.64688	441	0.26275
442	0.59919	44.2	0.389	44.2	0.18994	442	0.76388	442	0.64731	442	0.26306
443	0.59919	44.3	0.38975	44.3	0.19006	443	0.76444	443	0.64788	443	0.26369
444	0.59919	44.4	0.39025	44.4	0.19038	444	0.765	444	0.64838	444	0.264
445	0.59919	44.5	0.39094	44.5	0.19069	445	0.76569	445	0.64894	445	0.26456
446	0.59919	44.6	0.39163	44.6	0.19094	446	0.766	446	0.64944	446	0.265
447	0.59919	44.7	0.39219	44.7	0.19106	447	0.7665	447	0.64994	447	0.26544
448	0.59919	44.8	0.39294	44.8	0.19138	448	0.767	448	0.65044	448	0.26594
449	0.59919	44.9	0.39363	44.9	0.19169	449	0.76769	449	0.65094	449	0.26631
450	0.59919	45	0.39419	45	0.19194	450	0.76813	450	0.65144	450	0.26687
451	0.59919	45.1	0.39494	45.1	0.19206	451	0.76881	451	0.65194	451	0.26719
452	0.59919	45.2	0.3955	45.2	0.19225	452	0.76925	452	0.65244	452	0.26781
453	0.59919	45.3	0.39606	45.3	0.19263	453	0.76988	453	0.65294	453	0.26813
454	0.59925	45.4	0.39688	45.4	0.19294	454	0.77038	454	0.65338	454	0.26875
455	0.59919	45.5	0.3975	45.5	0.193	455	0.77094	455	0.65394	455	0.26906
456	0.59919	45.6	0.39806	45.6	0.19325	456	0.7715	456	0.65431	456	0.26963
457	0.59919	45.7	0.39881	45.7	0.19363	457	0.772	457	0.65488	457	0.27
458	0.59919	45.8	0.39931	45.8	0.19394	458	0.77263	458	0.65531	458	0.27044
459	0.59925	45.9	0.4	45.9	0.194	459	0.77306	459	0.65581	459	0.27094
460	0.59925	46	0.40081	46	0.19419	460	0.77375	460	0.65625	460	0.27131
461	0.59919	46.1	0.40144	46.1	0.19456	461	0.77413	461	0.65681	461	0.27188
462	0.59919	46.2	0.40206	46.2	0.19488	462	0.77481	462	0.65719	462	0.27219
463	0.59919	46.3	0.40288	46.3	0.195	463	0.77525	463	0.65775	463	0.27281
464	0.59919	46.4	0.4035	46.4	0.19519	464	0.77588	464	0.65813	464	0.27306
465	0.59919	46.5	0.40406	46.5	0.19556	465	0.77631	465	0.65869	465	0.27369
466	0.59919	46.6	0.40488	46.6	0.19581	466	0.77694	466	0.65906	466	0.274
467	0.59919	46.7	0.40556	46.7	0.19594	467	0.77738	467	0.65963	467	0.27456
468	0.59925	46.8	0.40606	46.8	0.19613	468	0.77794	468	0.66	468	0.275
469	0.59925	46.9	0.40694	46.9	0.19644	469	0.77844	469	0.66056	469	0.27544
470	0.59925	47	0.40756	47	0.19681	470	0.77894	470	0.661	470	0.27594
471	0.59925	47.1	0.40813	47.1	0.19694	471	0.7795	471	0.66144	471	0.27625
472	0.59925	47.2	0.40894	47.2	0.19706	472	0.78	472	0.66194	472	0.27688
473	0.59925	47.3	0.40963	47.3	0.19738	473	0.78056	473	0.66231	473	0.27719
474	0.59931	47.4	0.41019	47.4	0.19775	474	0.781	474	0.66281	474	0.27781
475	0.59931	47.5	0.41094	47.5	0.19794	475	0.78156	475	0.66319	475	0.27806
476	0.59931	47.6	0.41156	47.6	0.19806	476	0.782	476	0.66375	476	0.27869
477	0.59931	47.7	0.41213	47.7	0.19831	477	0.7825	477	0.66413	477	0.279
478	0.59931	47.8	0.41294	47.8	0.19869	478	0.783	478	0.66463	478	0.2795
479	0.59931	47.9	0.41369	47.9	0.19888	479	0.78356	479	0.665	479	0.27994
480	0.59931	48	0.41413	48	0.199	480	0.784	480	0.6655	480	0.28038
481	0.59931	48.1	0.41494	48.1	0.19925	481	0.78456	481	0.66594	481	0.28094
482	0.59931	48.2	0.41563	48.2	0.19963	482	0.785	482	0.66631	482	0.28125
483	0.59931	48.3	0.41613	48.3	0.19988	483	0.78556	483	0.66681	483	0.28188
484	0.59938	48.4	0.41688	48.4	0.2	484	0.786	484	0.66719	484	0.28213
485	0.59938	48.5	0.41763	48.5	0.20019	485	0.78656	485	0.66769	485	0.28275
486	0.59938	48.6	0.41813	48.6	0.2005	486	0.787	486	0.66806	486	0.28306
487	0.59938	48.7	0.41888	48.7	0.20081	487	0.7875	487	0.66856	487	0.28363
488	0.59938	48.8	0.41956	48.8	0.20094	488	0.788	488	0.66894	488	0.284
489	0.59944	48.9	0.42013	48.9	0.20113	489	0.7885	489	0.66931	489	0.2845
490	0.59944	49	0.42088	49	0.20144	490	0.78894	490	0.66981	490	0.28494
491	0.59944	49.1	0.4215	49.1	0.20175	491	0.78944	491	0.67013	491	0.28537
492	0.59944	49.2	0.42206	49.2	0.20194	492	0.78994	492	0.67069	492	0.28594
493	0.59944	49.3	0.42281	49.3	0.20206	493	0.79038	493	0.671	493	0.28625
494	0.59944	49.4	0.4235	49.4	0.20225	494	0.79094	494	0.67144	494	0.28688
495	0.59944	49.5	0.42406	49.5	0.20275	495	0.79131	495	0.67188	495	0.28713
496	0.59944	49.6	0.42481	49.6	0.20288	496	0.79188	496	0.67225	496	0.28775
497	0.59944	49.7	0.42531	49.7	0.20306	497	0.79225	497	0.67275	497	0.28806
498	0.59944	49.8	0.426	49.8	0.20325	498	0.79281	498	0.67306	498	0.28863
499	0.59944	49.9	0.42675	49.9	0.20363	499	0.79319	499	0.67356	499	0.289
500	0.59944	50	0.42731	50	0.20388	500	0.79375	500	0.67394	500	0.2895
501	0.59944	50.1	0.42794	50.1	0.204	501	0.79413	501	0.67431	501	0.28994
502	0.59944	50.2	0.42863	50.2	0.20419	502	0.79469	502	0.67475	502	0.29038
503	0.59944	50.3	0.42919	50.3	0.20456	503	0.795	503	0.67506	503	0.29094
504	0.59944	50.4	0.42994	50.4	0.20481	504	0.79556	504	0.67556	504	0.29125
505	0.59944	50.5	0.4305	50.5	0.205	505	0.796	505	0.67594	505	0.29188
506	0.59944	50.6	0.43106	50.6	0.20519	506	0.79638	506	0.67625	506	0.29213
507	0.59944	50.7	0.43181	50.7	0.20544	507	0.79694	507	0.67675	507	0.29275
508	0.59944	50.8	0.43238	50.8	0.20581	508	0.79725	508	0.67706	508	0.29306
509	0.59944	50.9	0.433	50.9	0.206	509	0.79781	509	0.6775	509	0.29369
510	0.59944	51	0.43375	51	0.20606	510	0.79813	510	0.67788	510	0.294
511	0.5995	51.1	0.43425	51.1	0.20638	511	0.79869	511	0.67819	511	0.2945
512	0.5995	51.2	0.43494	51.2	0.20669	512	0.79906	512	0.67869	512	0.29494
513	0.5995	51.3	0.43563	51.3	0.20694	513	0.79956	513	0.679	513	0.29538
514	0.5995	51.4	0.43613	51.4	0.207	514	0.79994	514	0.67938	514	0.29594
515	0.5995	51.5	0.43681	51.5	0.20731	515	0.80038	515	0.67981	515	0.29625
516	0.59956	51.6	0.4375	51.6	0.20763	516	0.80088	516	0.68013	516	0.29688
517	0.59956	51.7	0.43806	51.7	0.20788	517	0.80119	517	0.68056	517	0.29719
518	0.59956	51.8	0.43875	51.8	0.208	518	0.80175	518	0.68094	518	0.29781
519	0.59956	51.9	0.43925	51.9	0.20825	519	0.80206	519	0.68125	519	0.29806
520	0.59956	52	0.43994	52	0.20856	520	0.80256	520	0.68169	520	0.29869
521	0.59956	52.1	0.44063	52.1	0.20888	521	0.80294	521	0.682	521	0.299
522	0.59956	52.2	0.44106	52.2	0.209	522	0.80338	522	0.68238	522	0.29956
523	0.59963	52.3	0.44181	52.3	0.20919	523	0.80381	523	0.68281	523	0.3
524	0.59963	52.4	0.44238	52.4	0.20956	524	0.80413	524	0.68306	524	0.30044
525	0.59963	52.5	0.443	52.5	0.20988	525	0.80469	525	0.6835	525	0.30094
526	0.59963	52.6	0.44369	52.6	0.20994	526	0.805	526	0.68388	526	0.30131
527	0.59963	52.7	0.44419	52.7	0.21013	527	0.8055	527	0.68419	527	0.30188
528	0.59963	52.8	0.44488	52.8	0.2105	528	0.80594	528	0.68463	528	0.30213
529	0.59963	52.9	0.4455	52.9	0.21081	529	0.80625	529	0.68494	529	0.30275
530	0.59963	53	0.44606	53	0.21094	530	0.80675	530	0.68525	530	0.30306
531	0.59969	53.1	0.44675	53.1	0.21113	531	0.80706	531	0.68569	531	0.30369
532	0.59969	53.2	0.44725	53.2	0.21144	532	0.8075	532	0.686	532	0.304
533	0.59969	53.3	0.44794	53.3	0.21175	533	0.80794	533	0.68625	533	0.30456
534	0.59969	53.4	0.44863	53.4	0.21194	534	0.80831	534	0.68669	534	0.305
535	0.59969	53.5	0.44906	53.5	0.21206	535	0.80881	535	0.687	535	0.30544
536	0.59969	53.6	0.44981	53.6	0.21231	536	0.80906	536	0.68731	536	0.30594
537	0.59969	53.7	0.45038	53.7	0.21269	537	0.80956	537	0.68775	537	0.30631
538	0.59969	53.8	0.451	53.8	0.21288	538	0.80994	538	0.688	538	0.30688
539	0.59975	53.9	0.45163	53.9	0.213	539	0.81031	539	0.68838	539	0.30725
540	0.59975	54	0.45206	54	0.21319	540	0.81081	540	0.68875	540	0.30781
541	0.59975	54.1	0.45281	54.1	0.21356	541	0.81106	541	0.68906	541	0.30813
542	0.59975	54.2	0.45338	54.2	0.21388	542	0.81156	542	0.68938	542	0.30875
543	0.59975	54.3	0.454	54.3	0.21394	543	0.81194	543	0.68981	543	0.30906
544	0.59975	54.4	0.45463	54.4	0.21413	544	0.81225	544	0.69006	544	0.30969
545	0.59975	54.5	0.45513	54.5	0.21444	545	0.81275	545	0.69038	545	0.31
546	0.59975	54.6	0.45581	54.6	0.21475	546	0.81306	546	0.69081	546	0.31056
547	0.59981	54.7	0.45638	54.7	0.21494	547	0.8135	547	0.69106	547	0.311
548	0.59975	54.8	0.457	54.8	0.21506	548	0.81388	548	0.69138	548	0.31144
549	0.59981	54.9	0.45769	54.9	0.21538	549	0.81413	549	0.69175	549	0.31194
550	0.59981	55	0.45806	55	0.21569	550	0.81463	550	0.692	550	0.31231
551	0.59981	55.1	0.45881	55.1	0.21588	551	0.81494	551	0.69231	551	0.31288
552	0.59981	55.2	0.45931	55.2	0.216	552	0.81525	552	0.69275	552	0.31325
553	0.59981	55.3	0.45994	55.3	0.21625	553	0.81575	553	0.693	553	0.31388
554	0.59981	55.4	0.4605	55.4	0.21663	554	0.81606	554	0.69331	554	0.31419
555	0.59988	55.5	0.46106	55.5	0.21688	555	0.81644	555	0.69369	555	0.31481
556	0.59988	55.6	0.46175	55.6	0.217	556	0.81688	556	0.69394	556	0.31513
557	0.59988	55.7	0.46213	55.7	0.21719	557	0.81713	557	0.69419	557	0.31569
558	0.59988	55.8	0.46288	55.8	0.2175	558	0.81763	558	0.69463	558	0.31606
559	0.59988	55.9	0.46344	55.9	0.21781	559	0.81794	559	0.69494	559	0.31663
560	0.59994	56	0.464	56	0.21794	560	0.81825	560	0.69513	560	0.317
561	0.59994	56.1	0.46463	56.1	0.21806	561	0.81869	561	0.69556	561	0.31756
562	0.59994	56.2	0.46513	56.2	0.21831	562	0.819	562	0.69588	562	0.318
563	0.59994	56.3	0.46581	56.3	0.21869	563	0.81931	563	0.69606	563	0.31844
564	0.59994	56.4	0.46625	56.4	0.21894	564	0.81981	564	0.69644	564	0.31894
565	0.59994	56.5	0.46694	56.5	0.219	565	0.82	565	0.69675	565	0.31931
566	0.59994	56.6	0.46756	56.6	0.21919	566	0.82038	566	0.697	566	0.31988
567	0.59994	56.7	0.46806	56.7	0.21956	567	0.82081	567	0.69731	567	0.32025
568	0.59994	56.8	0.46875	56.8	0.21981	568	0.82106	568	0.69769	568	0.32088
569	0.59994	56.9	0.46913	56.9	0.21994	569	0.82144	569	0.69794	569	0.32119
570	0.59994	57	0.46988	57	0.22013	570	0.82188	570	0.69813	570	0.32181
571	0.59994	57.1	0.47038	57.1	0.22044	571	0.82206	571	0.6985	571	0.32213
572	0.59994	57.2	0.471	57.2	0.22069	572	0.8225	572	0.69881	572	0.32275
573	0.59994	57.3	0.47156	57.3	0.22094	573	0.82288	573	0.69906	573	0.32306
574	0.59994	57.4	0.47206	57.4	0.22106	574	0.82313	574	0.69938	574	0.32369
575	0.6	57.5	0.47275	57.5	0.22131	575	0.8235	575	0.69969	575	0.32406
576	0.6	57.6	0.47319	57.6	0.22163	576	0.82388	576	0.69994	576	0.32463
577	0.6	57.7	0.47388	57.7	0.22188	577	0.82413	577	0.70013	577	0.325
578	0.6	57.8	0.47444	57.8	0.222	578	0.8245	578	0.7005	578	0.32556
579	0.6	57.9	0.475	57.9	0.22213	579	0.82488	579	0.70081	579	0.326
580	0.6	58	0.47563	58	0.2225	580	0.82506	580	0.701	580	0.3265
581	0.6	58.1	0.47606	58.1	0.22275	581	0.8255	581	0.70125	581	0.32694
582	0.60006	58.2	0.47681	58.2	0.22294	582	0.82588	582	0.70156	582	0.32744
583	0.60006	58.3	0.47731	58.3	0.22306	583	0.82606	583	0.70188	583	0.32794
584	0.60006	58.4	0.47794	58.4	0.22338	584	0.82644	584	0.70206	584	0.32838
585	0.60006	58.5	0.4785	58.5	0.22369	585	0.82681	585	0.70231	585	0.32894
586	0.60006	58.6	0.47906	58.6	0.22388	586	0.82706	586	0.70263	586	0.32938
587	0.60006	58.7	0.47975	58.7	0.224	587	0.82738	587	0.70288	587	0.32994
588	0.60013	58.8	0.48025	58.8	0.22419	588	0.82775	588	0.70306	588	0.33031
589	0.60013	58.9	0.48094	58.9	0.2245	589	0.828	589	0.70338	589	0.33088
590	0.60013	59	0.48144	59	0.22481	590	0.82831	590	0.70369	590	0.33125
591	0.60013	59.1	0.482	59.1	0.225	591	0.82869	591	0.70394	591	0.33188
592	0.60013	59.2	0.48269	59.2	0.22513	592	0.82894	592	0.70413	592	0.33225
593	0.60013	59.3	0.48319	59.3	0.22544	593	0.82919	593	0.70444	593	0.33288
594	0.60013	59.4	0.48388	59.4	0.22575	594	0.82963	594	0.70475	594	0.33325
595	0.60019	59.5	0.48431	59.5	0.22594	595	0.82994	595	0.70494	595	0.33388
596	0.60019	59.6	0.48494	59.6	0.22606	596	0.83006	596	0.70513	596	0.33413
597	0.60019	59.7	0.48556	59.7	0.22625	597	0.83044	597	0.70544	597	0.33481
598	0.60025	59.8	0.48606	59.8	0.22663	598	0.83081	598	0.70575	598	0.33513
599	0.60025	59.9	0.48669	59.9	0.22688	599	0.831	599	0.706	599	0.33575
600	0.60025	60	0.48713	60	0.227	600	0.83131	600	0.70619	600	0.33613
601	0.60025	60.1	0.48781	60.1	0.22713	601	0.83169	601	0.70644	601	0.33675
602	0.60025	60.2	0.48831	60.2	0.22744	602	0.83194	602	0.70675	602	0.33713
603	0.60025	60.3	0.48894	60.3	0.22775	603	0.83213	603	0.70694	603	0.33775
604	0.60025	60.4	0.48944	60.4	0.22794	604	0.8325	604	0.70713	604	0.33813
605	0.60031	60.5	0.49	60.5	0.22806	605	0.83281	605	0.70744	605	0.33875
606	0.60031	60.6	0.49069	60.6	0.22825	606	0.833	606	0.70769	606	0.33906
607	0.60031	60.7	0.49113	60.7	0.22863	607	0.83331	607	0.70794	607	0.33975
608	0.60031	60.8	0.49181	60.8	0.22881	608	0.83369	608	0.70813	608	0.34013
609	0.60031	60.9	0.49225	60.9	0.229	609	0.83394	609	0.70838	609	0.34075
610	0.60031	61	0.49294	61	0.22913	610	0.83413	610	0.70869	610	0.34113
611	0.60031	61.1	0.4935	61.1	0.22944	611	0.83444	611	0.70888	611	0.34175
612	0.60031	61.2	0.49394	61.2	0.22975	612	0.83481	612	0.70906	612	0.34213
613	0.60031	61.3	0.4945	61.3	0.22994	613	0.835	613	0.70931	613	0.34275
614	0.60031	61.4	0.49506	61.4	0.23006	614	0.83525	614	0.70956	614	0.34313
615	0.60031	61.5	0.49569	61.5	0.23025	615	0.83556	615	0.70981	615	0.34375
616	0.60031	61.6	0.49613	61.6	0.23063	616	0.83588	616	0.71	616	0.34413
617	0.60038	61.7	0.49681	61.7	0.23081	617	0.83606	617	0.71019	617	0.34481
618	0.60038	61.8	0.49731	61.8	0.231	618	0.83631	618	0.71044	618	0.34513
619	0.60038	61.9	0.49794	61.9	0.23113	619	0.83663	619	0.71075	619	0.34581
620	0.60038	62	0.49844	62	0.23138	620	0.83688	620	0.71094	620	0.34619
621	0.60038	62.1	0.499	62.1	0.23175	621	0.83706	621	0.71113	621	0.34681
622	0.60038	62.2	0.49956	62.2	0.23188	622	0.83738	622	0.71131	622	0.34719
623	0.60038	62.3	0.50006	62.3	0.23206	623	0.83769	623	0.71163	623	0.34788
624	0.60038	62.4	0.50069	62.4	0.23225	624	0.83794	624	0.71188	624	0.34825
625	0.60038	62.5	0.50119	62.5	0.23256	625	0.83806	625	0.712	625	0.34888
626	0.60044	62.6	0.50188	62.6	0.23288	626	0.83838	626	0.71219	626	0.34925
627	0.60044	62.7	0.50225	62.7	0.23294	627	0.83869	627	0.71244	627	0.34994
628	0.60044	62.8	0.50288	62.8	0.23313	628	0.83894	628	0.71269	628	0.35031
629	0.60038	62.9	0.50344	62.9	0.23338	629	0.83906	629	0.71288	629	0.35094
630	0.60044	63	0.504	63	0.23375	630	0.83938	630	0.713	630	0.35138
631	0.60044	63.1	0.50456	63.1	0.23388	631	0.83969	631	0.71319	631	0.35194
632	0.60044	63.2	0.50506	63.2	0.234	632	0.83988	632	0.71344	632	0.3525
633	0.60044	63.3	0.50575	63.3	0.23419	633	0.84006	633	0.71369	633	0.353
634	0.60044	63.4	0.50613	63.4	0.2345	634	0.84031	634	0.71388	634	0.35356
635	0.6005	63.5	0.50681	63.5	0.23475	635	0.84063	635	0.714	635	0.354
636	0.6005	63.6	0.50725	63.6	0.23494	636	0.84088	636	0.71419	636	0.35463
637	0.6005	63.7	0.50788	63.7	0.23506	637	0.841	637	0.71444	637	0.35506
638	0.6005	63.8	0.50831	63.8	0.23531	638	0.84125	638	0.71469	638	0.35569
639	0.6005	63.9	0.50894	63.9	0.23563	639	0.8415	639	0.71488	639	0.35613
640	0.6005	64	0.50944	64	0.23588	640	0.84181	640	0.715	640	0.35681
641	0.60056	64.1	0.50994	64.1	0.236	641	0.84194	641	0.71519	641	0.35719
642	0.6005	64.2	0.51025	64.2	0.23619	642	0.84213	642	0.71538	642	0.35788
643	0.60056	64.3	0.51094	64.3	0.23644	643	0.84238	643	0.71563	643	0.35825
644	0.60056	64.4	0.51144	64.4	0.23681	644	0.84269	644	0.71581	644	0.35888
645	0.60056	64.5	0.51194	64.5	0.23694	645	0.84288	645	0.716	645	0.35938
646	0.60056	64.6	0.51244	64.6	0.23706	646	0.84306	646	0.71613	646	0.35994
647	0.60063	64.7	0.513	64.7	0.23725	647	0.84325	647	0.71631	647	0.3605
648	0.60063	64.8	0.51356	64.8	0.23763	648	0.84356	648	0.71656	648	0.361
649	0.60063	64.9	0.51406	64.9	0.23788	649	0.84381	649	0.71681	649	0.36163
650	0.60063	65	0.51469	65	0.23794	650	0.84394	650	0.71694	650	0.36206
651	0.60063	65.1	0.51513	65.1	0.23813	651	0.84413	651	0.71706	651	0.36275
652	0.60063	65.2	0.51581	65.2	0.23825	652	0.84431	652	0.71725	652	0.36313
653	0.60063	65.3	0.51613	65.3	0.23869	653	0.84463	653	0.7175	653	0.36381
654	0.60069	65.4	0.51681	65.4	0.23888	654	0.84488	654	0.71769	654	0.36425
655	0.60069	65.5	0.51731	65.5	0.239	655	0.845	655	0.71788	655	0.36494
656	0.60069	65.6	0.51788	65.6	0.23913	656	0.84513	656	0.718	656	0.36538
657	0.60069	65.7	0.51831	65.7	0.2395	657	0.84538	657	0.71813	657	0.36594
658	0.60069	65.8	0.51894	65.8	0.23975	658	0.84569	658	0.71831	658	0.3665
659	0.60069	65.9	0.51944	65.9	0.23994	659	0.84588	659	0.7185	659	0.367
660	0.60069	66	0.52	66	0.24	660	0.846	660	0.71875	660	0.36763
661	0.60069	66.1	0.52056	66.1	0.24025	661	0.84613	661	0.71888	661	0.36806
662	0.60069	66.2	0.521	66.2	0.24056	662	0.84631	662	0.719	662	0.36875
663	0.60069	66.3	0.52163	66.3	0.24081	663	0.84663	663	0.71913	663	0.36919
664	0.60075	66.4	0.522	66.4	0.241	664	0.84681	664	0.71931	664	0.36988
665	0.60075	66.5	0.52269	66.5	0.24113	665	0.84694	665	0.71956	665	0.37038
666	0.60075	66.6	0.52306	66.6	0.24144	666	0.84713	666	0.71975	666	0.37094
667	0.60075	66.7	0.52369	66.7	0.24169	667	0.84731	667	0.71988	667	0.37156
668	0.60081	66.8	0.52406	66.8	0.24188	668	0.84756	668	0.72	668	0.37206
669	0.60081	66.9	0.52481	66.9	0.242	669	0.84775	669	0.72013	669	0.37275
670	0.60081	67	0.52519	67	0.24225	670	0.84794	670	0.72031	670	0.37319
671	0.60081	67.1	0.52575	67.1	0.24256	671	0.84806	671	0.72056	671	0.37388
672	0.60081	67.2	0.52613	67.2	0.24281	672	0.84819	672	0.72075	672	0.37431
673	0.60081	67.3	0.52681	67.3	0.24294	673	0.84844	673	0.72088	673	0.37494
674	0.60081	67.4	0.52719	67.4	0.24306	674	0.84869	674	0.721	674	0.37556
675	0.60081	67.5	0.52781	67.5	0.24331	675	0.84888	675	0.72113	675	0.37606
676	0.60081	67.6	0.52819	67.6	0.24363	676	0.849	676	0.72131	676	0.37675
677	0.60081	67.7	0.52881	67.7	0.24388	677	0.84913	677	0.7215	677	0.37719
678	0.60081	67.8	0.52931	67.8	0.244	678	0.84931	678	0.72169	678	0.37788
679	0.60081	67.9	0.52988	67.9	0.24419	679	0.84956	679	0.72181	679	0.37838
680	0.60081	68	0.53031	68	0.24444	680	0.84975	680	0.72194	680	0.379
681	0.60088	68.1	0.53088	68.1	0.24475	681	0.84994	681	0.72206	681	0.37963
682	0.60088	68.2	0.53131	68.2	0.24494	682	0.85006	682	0.72219	682	0.38013
683	0.60088	68.3	0.53194	68.3	0.24506	683	0.85019	683	0.72231	683	0.38081
684	0.60088	68.4	0.53231	68.4	0.24525	684	0.85038	684	0.72256	684	0.38131
685	0.60088	68.5	0.53288	68.5	0.24556	685	0.85063	685	0.72275	685	0.38194
686	0.60088	68.6	0.53344	68.6	0.24581	686	0.85081	686	0.72288	686	0.3825
687	0.60088	68.7	0.53394	68.7	0.24594	687	0.85094	687	0.72294	687	0.38306
688	0.60088	68.8	0.53438	68.8	0.24606	688	0.85106	688	0.72306	688	0.38375
689	0.60094	68.9	0.53494	68.9	0.24638	689	0.85119	689	0.72319	689	0.38419
690	0.60094	69	0.53544	69	0.24669	690	0.85138	690	0.72338	690	0.38494
691	0.60094	69.1	0.53594	69.1	0.24688	691	0.85156	691	0.7235	691	0.3855
692	0.60094	69.2	0.53638	69.2	0.247	692	0.85181	692	0.72369	692	0.386
693	0.60094	69.3	0.53694	69.3	0.24719	693	0.85188	693	0.72381	693	0.38675
694	0.60094	69.4	0.53744	69.4	0.2475	694	0.852	694	0.72394	694	0.38719
695	0.601	69.5	0.53794	69.5	0.24781	695	0.85213	695	0.724	695	0.38794
696	0.601	69.6	0.53838	69.6	0.24794	696	0.85231	696	0.72413	696	0.3885
697	0.601	69.7	0.53894	69.7	0.24806	697	0.8525	697	0.72425	697	0.38906
698	0.601	69.8	0.53944	69.8	0.24825	698	0.85269	698	0.72444	698	0.38981
699	0.601	69.9	0.53994	69.9	0.24863	699	0.85288	699	0.72463	699	0.39025
700	0.60106	70	0.54038	70	0.24881	700	0.85294	700	0.72475	700	0.39094
701	0.60106	70.1	0.54094	70.1	0.249	701	0.85306	701	0.72488	701	0.39156
702	0.60106	70.2	0.54144	70.2	0.24913	702	0.85319	702	0.72494	702	0.39206
703	0.60106	70.3	0.54194	70.3	0.24944	703	0.85338	703	0.72506	703	0.39288
704	0.60106	70.4	0.54238	70.4	0.24975	704	0.85356	704	0.72519	704	0.39338
705	0.60106	70.5	0.54294	70.5	0.24988	705	0.85375	705	0.72531	705	0.394
706	0.60106	70.6	0.54338	70.6	0.25	706	0.85388	706	0.72544	706	0.39469
707	0.60106	70.7	0.54394	70.7	0.25019	707	0.85394	707	0.72563	707	0.39519
708	0.60106	70.8	0.54431	70.8	0.2505	708	0.85406	708	0.72575	708	0.39594
709	0.60106	70.9	0.54488	70.9	0.25075	709	0.85419	709	0.72581	709	0.3965
710	0.60106	71	0.54538	71	0.25094	710	0.85431	710	0.72594	710	0.39706
711	0.60106	71.1	0.54594	71.1	0.25106	711	0.8545	711	0.726	711	0.39781
712	0.60113	71.2	0.54631	71.2	0.25131	712	0.85469	712	0.72606	712	0.39825
713	0.60106	71.3	0.54688	71.3	0.25156	713	0.85481	713	0.72619	713	0.39894
714	0.60113	71.4	0.54725	71.4	0.25188	714	0.85494	714	0.72631	714	0.39963
715	0.60113	71.5	0.54788	71.5	0.252	715	0.855	715	0.7265	715	0.40013
716	0.60113	71.6	0.54819	71.6	0.25206	716	0.85513	716	0.72663	716	0.40088
717	0.60113	71.7	0.54881	71.7	0.25238	717	0.85525	717	0.72675	717	0.4015
718	0.60113	71.8	0.54925	71.8	0.25269	718	0.85538	718	0.72688	718	0.40206
719	0.60113	71.9	0.54981	71.9	0.25288	719	0.85556	719	0.72694	719	0.40281
720	0.60113	72	0.55013	72	0.253	720	0.85575	720	0.727	720	0.40331
721	0.60119	72.1	0.55075	72.1	0.25319	721	0.85588	721	0.72706	721	0.404
722	0.60119	72.2	0.55113	72.2	0.2535	722	0.85594	722	0.72713	722	0.40469
723	0.60119	72.3	0.55175	72.3	0.25381	723	0.856	723	0.72725	723	0.40519
724	0.60119	72.4	0.55206	72.4	0.25394	724	0.85613	724	0.72738	724	0.40594
725	0.60119	72.5	0.55269	72.5	0.254	725	0.85619	725	0.7275	725	0.40656
726	0.60119	72.6	0.55306	72.6	0.25406	726	0.85638	726	0.72763	726	0.40713
727	0.60119	72.7	0.55369	72.7	0.25444	727	0.85656	727	0.72775	727	0.40788
728	0.60119	72.8	0.554	72.8	0.25469	728	0.85669	728	0.72781	728	0.4085
729	0.60125	72.9	0.55456	72.9	0.25488	729	0.85681	729	0.72788	729	0.40906
730	0.60125	73	0.555	73	0.255	730	0.85688	730	0.728	730	0.40988
731	0.60125	73.1	0.55556	73.1	0.25519	731	0.85694	731	0.728	731	0.41038
732	0.60125	73.2	0.556	73.2	0.25544	732	0.85706	732	0.72813	732	0.411
733	0.60131	73.3	0.5565	73.3	0.25581	733	0.85713	733	0.72819	733	0.41181
734	0.60131	73.4	0.55694	73.4	0.25594	734	0.85725	734	0.72831	734	0.41231
735	0.60131	73.5	0.55738	73.5	0.25606	735	0.85738	735	0.72844	735	0.413
736	0.60131	73.6	0.55794	73.6	0.25625	736	0.85756	736	0.7285	736	0.41375
737	0.60131	73.7	0.55831	73.7	0.25663	737	0.85769	737	0.72863	737	0.41425
738	0.60131	73.8	0.55881	73.8	0.25688	738	0.85781	738	0.72869	738	0.415
739	0.60131	73.9	0.55919	73.9	0.257	739	0.85788	739	0.72881	739	0.41569
740	0.60131	74	0.55981	74	0.25706	740	0.85794	740	0.72888	740	0.41625
741	0.60131	74.1	0.56013	74.1	0.25738	741	0.858	741	0.72894	741	0.417
742	0.60138	74.2	0.56075	74.2	0.25769	742	0.85806	742	0.729	742	0.41769
743	0.60138	74.3	0.56106	74.3	0.25788	743	0.85813	743	0.729	743	0.41825
744	0.60138	74.4	0.56156	74.4	0.258	744	0.85825	744	0.72906	744	0.41894
745	0.60138	74.5	0.562	74.5	0.25819	745	0.85838	745	0.72919	745	0.41969
746	0.60138	74.6	0.5625	74.6	0.25844	746	0.8585	746	0.72925	746	0.42019
747	0.60138	74.7	0.56294	74.7	0.25881	747	0.85863	747	0.72931	747	0.42094
748	0.60138	74.8	0.56344	74.8	0.25894	748	0.85875	748	0.72944	748	0.42169
749	0.60138	74.9	0.56394	74.9	0.25906	749	0.85881	749	0.7295	749	0.42219
750	0.60138	75	0.56425	75	0.25925	750	0.85894	750	0.72963	750	0.42294
751	0.60138	75.1	0.56481	75.1	0.25963	751	0.85894	751	0.72969	751	0.42369
752	0.60138	75.2	0.56525	75.2	0.25981	752	0.859	752	0.72975	752	0.42425
753	0.60138	75.3	0.56581	75.3	0.26	753	0.85906	753	0.72981	753	0.42494
754	0.60138	75.4	0.56606	75.4	0.26006	754	0.85919	754	0.72988	754	0.42569
755	0.60144	75.5	0.56663	75.5	0.26038	755	0.85925	755	0.72988	755	0.42625
756	0.60144	75.6	0.56706	75.6	0.26063	756	0.85938	756	0.72994	756	0.427
757	0.60138	75.7	0.56756	75.7	0.26088	757	0.8595	757	0.73	757	0.42775
758	0.60138	75.8	0.568	75.8	0.261	758	0.85963	758	0.73006	758	0.42831
759	0.60144	75.9	0.56844	75.9	0.26119	759	0.85969	759	0.73006	759	0.429
760	0.60144	76	0.56894	76	0.26138	760	0.85981	760	0.73013	760	0.42981
761	0.60138	76.1	0.56925	76.1	0.26175	761	0.85988	761	0.73019	761	0.43025
762	0.60144	76.2	0.56981	76.2	0.26194	762	0.85994	762	0.73025	762	0.431
763	0.60144	76.3	0.57019	76.3	0.26206	763	0.85994	763	0.73031	763	0.43175
764	0.60144	76.4	0.57069	76.4	0.26219	764	0.86	764	0.73038	764	0.43231
765	0.60144	76.5	0.57106	76.5	0.26256	765	0.86006	765	0.73044	765	0.433
766	0.60144	76.6	0.57163	76.6	0.26281	766	0.86013	766	0.7305	766	0.43381
767	0.60144	76.7	0.572	76.7	0.26294	767	0.86025	767	0.73056	767	0.43444
768	0.60144	76.8	0.57238	76.8	0.26306	768	0.86031	768	0.73063	768	0.43506
769	0.60144	76.9	0.57294	76.9	0.26331	769	0.86038	769	0.73069	769	0.43588
770	0.6015	77	0.57331	77	0.26363	770	0.8605	770	0.73075	770	0.4365
771	0.6015	77.1	0.57381	77.1	0.26388	771	0.86063	771	0.73075	771	0.43713
772	0.6015	77.2	0.57413	77.2	0.264	772	0.86069	772	0.73081	772	0.43794
773	0.6015	77.3	0.57469	77.3	0.26413	773	0.86075	773	0.73088	773	0.43856
774	0.6015	77.4	0.575	77.4	0.26438	774	0.86081	774	0.73088	774	0.43919
775	0.6015	77.5	0.57544	77.5	0.26475	775	0.86088	775	0.73094	775	0.43994
776	0.6015	77.6	0.57594	77.6	0.26494	776	0.86094	776	0.73094	776	0.44069
777	0.6015	77.7	0.57631	77.7	0.265	777	0.86094	777	0.731	777	0.44125
778	0.6015	77.8	0.57688	77.8	0.26519	778	0.861	778	0.731	778	0.442
779	0.60156	77.9	0.57713	77.9	0.26556	779	0.86106	779	0.731	779	0.44275
780	0.60156	78	0.57769	78	0.26581	780	0.86113	780	0.73106	780	0.44338
781	0.60156	78.1	0.57806	78.1	0.26594	781	0.86119	781	0.73106	781	0.44406
782	0.60156	78.2	0.57856	78.2	0.26606	782	0.86119	782	0.73106	782	0.44488
783	0.60156	78.3	0.57894	78.3	0.26625	783	0.86131	783	0.73113	783	0.4455
784	0.60156	78.4	0.57925	78.4	0.26656	784	0.86138	784	0.73113	784	0.44606
785	0.60163	78.5	0.57981	78.5	0.26681	785	0.86144	785	0.73119	785	0.44688
786	0.60163	78.6	0.58019	78.6	0.267	786	0.8615	786	0.73119	786	0.44756
787	0.60163	78.7	0.58069	78.7	0.26713	787	0.86156	787	0.73125	787	0.44813
788	0.60163	78.8	0.581	78.8	0.26738	788	0.86169	788	0.73125	788	0.44894
789	0.60163	78.9	0.58144	78.9	0.26775	789	0.86175	789	0.73125	789	0.44969
790	0.60163	79	0.58188	79	0.26788	790	0.86181	790	0.73131	790	0.45025
791	0.60163	79.1	0.58231	79.1	0.268	791	0.86181	791	0.73131	791	0.451
792	0.60163	79.2	0.58281	79.2	0.26819	792	0.86188	792	0.73138	792	0.45181
793	0.60163	79.3	0.58306	79.3	0.2685	793	0.86194	793	0.73138	793	0.45238
794	0.60163	79.4	0.58356	79.4	0.26881	794	0.86194	794	0.73138	794	0.45306
795	0.60163	79.5	0.584	79.5	0.26894	795	0.862	795	0.73144	795	0.45388
796	0.60163	79.6	0.58438	79.6	0.26906	796	0.862	796	0.73144	796	0.45456
797	0.60163	79.7	0.58488	79.7	0.26931	797	0.862	797	0.7315	797	0.45513
798	0.60163	79.8	0.58519	79.8	0.26963	798	0.86206	798	0.7315	798	0.45594
799	0.60169	79.9	0.58575	79.9	0.26981	799	0.86206	799	0.7315	799	0.45669
800	0.60163	80	0.586	80	0.27	800	0.86213	800	0.7315	800	0.45725
801	0.60169	80.1	0.5865	80.1	0.27006	801	0.86213	801	0.7315	801	0.458
802	0.60169	80.2	0.58688	80.2	0.27031	802	0.86219	802	0.73156	802	0.45881
803	0.60169	80.3	0.58719	80.3	0.27063	803	0.86225	803	0.73156	803	0.45944
804	0.60169	80.4	0.58775	80.4	0.27088	804	0.86231	804	0.73156	804	0.46006
805	0.60169	80.5	0.58806	80.5	0.271	805	0.86231	805	0.73156	805	0.46088
806	0.60169	80.6	0.5885	80.6	0.27113	806	0.86238	806	0.73156	806	0.46163
807	0.60169	80.7	0.58894	80.7	0.27144	807	0.86244	807	0.73156	807	0.46213
808	0.60169	80.8	0.58925	80.8	0.27169	808	0.8625	808	0.73156	808	0.46294
809	0.60169	80.9	0.58975	80.9	0.27188	809	0.86256	809	0.73156	809	0.46369
810	0.60169	81	0.59	81	0.272	810	0.86256	810	0.73156	810	0.46431
811	0.60175	81.1	0.5905	81.1	0.27219	811	0.86263	811	0.73156	811	0.465
812	0.60169	81.2	0.59088	81.2	0.2725	812	0.86269	812	0.73156	812	0.46581
813	0.60175	81.3	0.59119	81.3	0.27275	813	0.86269	813	0.73156	813	0.4665
814	0.60175	81.4	0.59175	81.4	0.27294	814	0.86275	814	0.73156	814	0.46713
815	0.60175	81.5	0.59206	81.5	0.27306	815	0.86275	815	0.73156	815	0.46794
816	0.60175	81.6	0.5925	81.6	0.27331	816	0.86281	816	0.73156	816	0.46869
817	0.60175	81.7	0.59294	81.7	0.27356	817	0.86281	817	0.7315	817	0.46925
818	0.60175	81.8	0.59319	81.8	0.27388	818	0.86288	818	0.7315	818	0.47
819	0.60175	81.9	0.59369	81.9	0.274	819	0.86288	819	0.7315	819	0.47081
820	0.60175	82	0.594	82	0.27413	820	0.86288	820	0.7315	820	0.47144
821	0.60175	82.1	0.59444	82.1	0.27444	821	0.86294	821	0.73144	821	0.47206
822	0.60175	82.2	0.59488	82.2	0.27469	822	0.86294	822	0.73144	822	0.47288
823	0.60181	82.3	0.59513	82.3	0.27488	823	0.86294	823	0.73144	823	0.47363
824	0.60181	82.4	0.59563	82.4	0.275	824	0.863	824	0.73138	824	0.47419
825	0.60181	82.5	0.596	82.5	0.27519	825	0.863	825	0.73138	825	0.475
826	0.60181	82.6	0.59638	82.6	0.27544	826	0.863	826	0.73131	826	0.47575
827	0.60181	82.7	0.59681	82.7	0.27581	827	0.863	827	0.73131	827	0.47638
828	0.60181	82.8	0.59706	82.8	0.27594	828	0.863	828	0.73131	828	0.47706
829	0.60181	82.9	0.5975	82.9	0.27606	829	0.86306	829	0.73125	829	0.47788
830	0.60181	83	0.59794	83	0.27625	830	0.86306	830	0.73125	830	0.47856
831	0.60181	83.1	0.59825	83.1	0.27663	831	0.86306	831	0.73119	831	0.47919
832	0.60181	83.2	0.59875	83.2	0.27688	832	0.86306	832	0.73119	832	0.47994
833	0.60181	83.3	0.599	83.3	0.277	833	0.86306	833	0.73119	833	0.48075
834	0.60181	83.4	0.59938	83.4	0.27713	834	0.86313	834	0.73113	834	0.48131
835	0.60188	83.5	0.59988	83.5	0.27744	835	0.86313	835	0.73113	835	0.48206
836	0.60188	83.6	0.60013	83.6	0.27769	836	0.86313	836	0.73106	836	0.48288
837	0.60188	83.7	0.60063	83.7	0.27788	837	0.86313	837	0.73106	837	0.4835
838	0.60188	83.8	0.60094	83.8	0.278	838	0.86313	838	0.731	838	0.48413
839	0.60188	83.9	0.60125	83.9	0.27819	839	0.86313	839	0.731	839	0.48494
840	0.60188	84	0.60175	84	0.2785	840	0.86319	840	0.731	840	0.48569
841	0.60188	84.1	0.602	84.1	0.27881	841	0.86319	841	0.73094	841	0.48625
842	0.60188	84.2	0.60244	84.2	0.27894	842	0.86319	842	0.73094	842	0.487
843	0.60188	84.3	0.60281	84.3	0.27906	843	0.86319	843	0.73088	843	0.48781
844	0.60188	84.4	0.60306	84.4	0.27925	844	0.86319	844	0.73088	844	0.48844
845	0.60188	84.5	0.60356	84.5	0.27963	845	0.86325	845	0.73081	845	0.48913
846	0.60188	84.6	0.60388	84.6	0.27988	846	0.86325	846	0.73081	846	0.48994
847	0.60194	84.7	0.60419	84.7	0.28	847	0.86325	847	0.73075	847	0.49063
848	0.60194	84.8	0.60469	84.8	0.28013	848	0.86325	848	0.73069	848	0.49125
849	0.60194	84.9	0.605	84.9	0.28044	849	0.86325	849	0.73063	849	0.492
850	0.60194	85	0.60525	85	0.28069	850	0.86325	850	0.73063	850	0.49281
851	0.60194	85.1	0.60581	85.1	0.28088	851	0.86325	851	0.73056	851	0.49344
852	0.60194	85.2	0.60606	85.2	0.281	852	0.86325	852	0.7305	852	0.49406
853	0.60194	85.3	0.60638	85.3	0.28119	853	0.86325	853	0.73044	853	0.49488
854	0.60194	85.4	0.60688	85.4	0.28144	854	0.86325	854	0.73038	854	0.49556
855	0.60194	85.5	0.60713	85.5	0.28181	855	0.86325	855	0.73031	855	0.49613
856	0.60194	85.6	0.60744	85.6	0.28194	856	0.86325	856	0.73025	856	0.49694
857	0.60194	85.7	0.60788	85.7	0.28206	857	0.86325	857	0.73019	857	0.49769
858	0.602	85.8	0.60819	85.8	0.28225	858	0.86325	858	0.73013	858	0.49831
859	0.60194	85.9	0.60863	85.9	0.28256	859	0.86325	859	0.73006	859	0.499
860	0.602	86	0.60894	86	0.28281	860	0.86325	860	0.73	860	0.49981
861	0.602	86.1	0.60925	86.1	0.28294	861	0.86319	861	0.73	861	0.50044
862	0.602	86.2	0.60969	86.2	0.28313	862	0.86325	862	0.72994	862	0.50106
863	0.602	86.3	0.60994	86.3	0.28338	863	0.86319	863	0.72988	863	0.50188
864	0.602	86.4	0.61031	86.4	0.28369	864	0.86319	864	0.72988	864	0.50256
865	0.602	86.5	0.61075	86.5	0.28388	865	0.86319	865	0.72981	865	0.50319
866	0.602	86.6	0.611	86.6	0.284	866	0.86319	866	0.72975	866	0.50394
867	0.602	86.7	0.61131	86.7	0.28419	867	0.86319	867	0.72969	867	0.50469
868	0.602	86.8	0.61175	86.8	0.2845	868	0.86319	868	0.72963	868	0.50531
869	0.602	86.9	0.61206	86.9	0.28475	869	0.86319	869	0.7295	869	0.506
870	0.602	87	0.61244	87	0.28494	870	0.86313	870	0.72944	870	0.50681
871	0.60206	87.1	0.61281	87.1	0.28506	871	0.86313	871	0.72931	871	0.50744
872	0.60206	87.2	0.613	87.2	0.28525	872	0.86313	872	0.72925	872	0.50806
873	0.60206	87.3	0.61338	87.3	0.28556	873	0.86313	873	0.72919	873	0.50894
874	0.60206	87.4	0.61381	87.4	0.28581	874	0.86313	874	0.72913	874	0.50963
875	0.60206	87.5	0.61406	87.5	0.28594	875	0.86306	875	0.72906	875	0.51006
876	0.60206	87.6	0.61444	87.6	0.28606	876	0.86306	876	0.729	876	0.51088
877	0.60206	87.7	0.61488	87.7	0.28638	877	0.86306	877	0.72894	877	0.51144
878	0.60206	87.8	0.61506	87.8	0.28669	878	0.86306	878	0.72888	878	0.51206
879	0.60206	87.9	0.61544	87.9	0.28688	879	0.86306	879	0.72881	879	0.51288
880	0.60213	88	0.61581	88	0.287	880	0.86306	880	0.72875	880	0.51363
881	0.60213	88.1	0.61606	88.1	0.28719	881	0.863	881	0.72863	881	0.51419
882	0.60213	88.2	0.6165	88.2	0.2875	882	0.863	882	0.72856	882	0.51494
883	0.60213	88.3	0.61688	88.3	0.28781	883	0.863	883	0.72844	883	0.51575
884	0.60213	88.4	0.61706	88.4	0.28794	884	0.863	884	0.72831	884	0.51631
885	0.60213	88.5	0.61744	88.5	0.28806	885	0.863	885	0.72825	885	0.517
886	0.60213	88.6	0.61781	88.6	0.28819	886	0.86294	886	0.72813	886	0.51781
887	0.60213	88.7	0.61806	88.7	0.28856	887	0.86294	887	0.72806	887	0.51844
888	0.60213	88.8	0.61838	88.8	0.28881	888	0.86294	888	0.728	888	0.51906
889	0.60213	88.9	0.61881	88.9	0.28894	889	0.86294	889	0.72794	889	0.51988
890	0.60213	89	0.61906	89	0.28906	890	0.86288	890	0.72788	890	0.5205
891	0.60213	89.1	0.61938	89.1	0.28938	891	0.86288	891	0.72781	891	0.52113
892	0.60213	89.2	0.61981	89.2	0.28963	892	0.86288	892	0.72769	892	0.52194
893	0.60219	89.3	0.62006	89.3	0.28988	893	0.86288	893	0.72756	893	0.52263
894	0.60219	89.4	0.62031	89.4	0.29	894	0.86281	894	0.72744	894	0.52319
895	0.60213	89.5	0.62081	89.5	0.29013	895	0.86281	895	0.72738	895	0.52394
896	0.60219	89.6	0.621	89.6	0.29038	896	0.86281	896	0.72725	896	0.52469
897	0.60219	89.7	0.62131	89.7	0.29075	897	0.86275	897	0.72713	897	0.52525
898	0.60219	89.8	0.62175	89.8	0.29094	898	0.86275	898	0.72706	898	0.526
899	0.60219	89.9	0.622	89.9	0.29106	899	0.86269	899	0.727	899	0.52675
900	0.60219	90	0.62219	90	0.29119	900	0.86269	900	0.72688	900	0.52731
901	0.60219	90.1	0.62269	90.1	0.29156	901	0.86263	901	0.72681	901	0.528
902	0.60219	90.2	0.62294	90.2	0.29181	902	0.86263	902	0.72669	902	0.52881
903	0.60225	90.3	0.62313	90.3	0.29194	903	0.86256	903	0.72656	903	0.52938
904	0.60219	90.4	0.6235	90.4	0.29206	904	0.8625	904	0.7265	904	0.53006
905	0.60225	90.5	0.62388	90.5	0.29231	905	0.8625	905	0.72631	905	0.53088
906	0.60219	90.6	0.62413	90.6	0.29263	906	0.86244	906	0.72619	906	0.53144
907	0.60225	90.7	0.62444	90.7	0.29288	907	0.86238	907	0.72613	907	0.53206
908	0.60225	90.8	0.62481	90.8	0.293	908	0.86238	908	0.726	908	0.53288
909	0.60225	90.9	0.625	90.9	0.29313	909	0.86231	909	0.72594	909	0.5335
910	0.60225	91	0.62531	91	0.29338	910	0.86225	910	0.72588	910	0.53413
911	0.60225	91.1	0.62569	91.1	0.29375	911	0.86225	911	0.72575	911	0.53488
912	0.60225	91.2	0.626	91.2	0.29394	912	0.86219	912	0.72569	912	0.53556
913	0.60225	91.3	0.62625	91.3	0.294	913	0.86219	913	0.7255	913	0.53613
914	0.60225	91.4	0.62663	91.4	0.29419	914	0.86213	914	0.72538	914	0.53694
915	0.60225	91.5	0.62688	91.5	0.2945	915	0.86206	915	0.72525	915	0.53763
916	0.60225	91.6	0.62713	91.6	0.29475	916	0.86206	916	0.72513	916	0.53819
917	0.60225	91.7	0.6275	91.7	0.29494	917	0.86206	917	0.725	917	0.53894
918	0.60225	91.8	0.62788	91.8	0.29506	918	0.862	918	0.72494	918	0.53963
919	0.60225	91.9	0.628	91.9	0.29525	919	0.862	919	0.72488	919	0.54019
920	0.60225	92	0.62831	92	0.29556	920	0.862	920	0.72475	920	0.54094
921	0.60225	92.1	0.62869	92.1	0.29588	921	0.86194	921	0.72463	921	0.54169
922	0.60225	92.2	0.629	92.2	0.296	922	0.86194	922	0.72444	922	0.54225
923	0.60225	92.3	0.62925	92.3	0.29606	923	0.86194	923	0.72431	923	0.54294
924	0.60225	92.4	0.62963	92.4	0.29638	924	0.86188	924	0.72419	924	0.54369
925	0.60225	92.5	0.62988	92.5	0.29669	925	0.86188	925	0.72406	925	0.54425
926	0.60225	92.6	0.63006	92.6	0.29688	926	0.86181	926	0.72394	926	0.545
927	0.60225	92.7	0.63044	92.7	0.297	927	0.86181	927	0.72388	927	0.54569
928	0.60225	92.8	0.63075	92.8	0.29719	928	0.86175	928	0.72375	928	0.54625
929	0.60225	92.9	0.63094	92.9	0.29744	929	0.86169	929	0.72363	929	0.547
930	0.60225	93	0.63125	93	0.29781	930	0.86163	930	0.72344	930	0.54769
931	0.60231	93.1	0.63163	93.1	0.29794	931	0.86156	931	0.72331	931	0.54825
932	0.60231	93.2	0.63188	93.2	0.29806	932	0.8615	932	0.72313	932	0.54894
933	0.60231	93.3	0.63206	93.3	0.29831	933	0.8615	933	0.72306	933	0.54969
934	0.60231	93.4	0.63244	93.4	0.29863	934	0.86138	934	0.72294	934	0.55025
935	0.60231	93.5	0.63281	93.5	0.29881	935	0.86131	935	0.72288	935	0.55094
936	0.60231	93.6	0.63294	93.6	0.299	936	0.86131	936	0.72275	936	0.55163
937	0.60231	93.7	0.63325	93.7	0.29913	937	0.86125	937	0.72256	937	0.55213
938	0.60231	93.8	0.63363	93.8	0.29938	938	0.86119	938	0.72244	938	0.55294
939	0.60231	93.9	0.63388	93.9	0.29969	939	0.86113	939	0.72225	939	0.55356
940	0.60231	94	0.63406	94	0.29988	940	0.86113	940	0.72213	940	0.55413
941	0.60231	94.1	0.63431	94.1	0.3	941	0.86106	941	0.722	941	0.55488
942	0.60238	94.2	0.63475	94.2	0.30019	942	0.861	942	0.72188	942	0.5555
943	0.60238	94.3	0.63494	94.3	0.3005	943	0.861	943	0.72175	943	0.55606
944	0.60238	94.4	0.63519	94.4	0.30075	944	0.86094	944	0.72163	944	0.55681
945	0.60238	94.5	0.63544	94.5	0.30094	945	0.86094	945	0.72144	945	0.55744
946	0.60238	94.6	0.63581	94.6	0.30106	946	0.86088	946	0.72125	946	0.558
947	0.60238	94.7	0.636	94.7	0.30125	947	0.86088	947	0.72113	947	0.55875
948	0.60238	94.8	0.63619	94.8	0.30156	948	0.86081	948	0.721	948	0.55931
949	0.60238	94.9	0.63663	94.9	0.30188	949	0.86075	949	0.72088	949	0.56
950	0.60238	95	0.63688	95	0.30194	950	0.86075	950	0.72081	950	0.56069
951	0.60238	95.1	0.63706	95.1	0.30206	951	0.86063	951	0.72063	951	0.56119
952	0.60244	95.2	0.63731	95.2	0.30231	952	0.86056	952	0.72044	952	0.56194
953	0.60244	95.3	0.63775	95.3	0.30263	953	0.8605	953	0.72025	953	0.56263
954	0.60244	95.4	0.63794	95.4	0.30281	954	0.86044	954	0.72006	954	0.56313
955	0.60244	95.5	0.63806	95.5	0.303	955	0.86038	955	0.72	955	0.56388
956	0.60244	95.6	0.63838	95.6	0.30313	956	0.86031	956	0.71988	956	0.5645
957	0.60244	95.7	0.63875	95.7	0.30338	957	0.86025	957	0.71975	957	0.56506
958	0.60244	95.8	0.63894	95.8	0.30375	958	0.86019	958	0.71956	958	0.56588
959	0.60244	95.9	0.63913	95.9	0.30388	959	0.86013	959	0.71938	959	0.56644
960	0.60244	96	0.63938	96	0.304	960	0.86006	960	0.71919	960	0.567
961	0.60244	96.1	0.63975	96.1	0.30419	961	0.86	961	0.71906	961	0.56775
962	0.60244	96.2	0.63994	96.2	0.3045	962	0.86	962	0.71894	962	0.56831
963	0.6025	96.3	0.64013	96.3	0.30475	963	0.85994	963	0.71881	963	0.569
964	0.6025	96.4	0.6405	96.4	0.30494	964	0.85994	964	0.71869	964	0.56969
965	0.6025	96.5	0.64081	96.5	0.30506	965	0.85988	965	0.71844	965	0.57019
966	0.6025	96.6	0.641	96.6	0.30525	966	0.85988	966	0.71825	966	0.57094
967	0.6025	96.7	0.64113	96.7	0.30556	967	0.85981	967	0.71806	967	0.57156
968	0.60244	96.8	0.64144	96.8	0.30588	968	0.85975	968	0.718	968	0.57213
969	0.6025	96.9	0.64175	96.9	0.306	969	0.85969	969	0.71788	969	0.57288
970	0.6025	97	0.642	97	0.30613	970	0.85963	970	0.71775	970	0.57344
971	0.6025	97.1	0.64219	97.1	0.30638	971	0.85956	971	0.71756	971	0.574
972	0.6025	97.2	0.6425	97.2	0.30669	972	0.85944	972	0.71738	972	0.57475
973	0.6025	97.3	0.64281	97.3	0.30688	973	0.85938	973	0.71719	973	0.57525
974	0.6025	97.4	0.64294	97.4	0.307	974	0.85931	974	0.717	974	0.57594
975	0.6025	97.5	0.64319	97.5	0.30719	975	0.85925	975	0.71694	975	0.57663
976	0.6025	97.6	0.6435	97.6	0.30744	976	0.85919	976	0.71675	976	0.57713
977	0.6025	97.7	0.64381	97.7	0.30781	977	0.85913	977	0.71656	977	0.57788
978	0.6025	97.8	0.64394	97.8	0.30794	978	0.85906	978	0.71638	978	0.57844
979	0.6025	97.9	0.64419	97.9	0.30806	979	0.859	979	0.71619	979	0.579
980	0.6025	98	0.6445	98	0.30819	980	0.859	980	0.716	980	0.57975
981	0.6025	98.1	0.64475	98.1	0.30863	981	0.85894	981	0.71588	981	0.58025
982	0.6025	98.2	0.64494	98.2	0.30888	982	0.85888	982	0.71575	982	0.58094
983	0.6025	98.3	0.64513	98.3	0.30894	983	0.85888	983	0.71556	983	0.58163
984	0.6025	98.4	0.64544	98.4	0.30913	984	0.85881	984	0.71531	984	0.58213
985	0.6025	98.5	0.64575	98.5	0.30931	985	0.85875	985	0.71513	985	0.58288
986	0.6025	98.6	0.64588	98.6	0.30969	986	0.85869	986	0.715	986	0.58338
987	0.6025	98.7	0.64606	98.7	0.30994	987	0.85856	987	0.71488	987	0.584
988	0.6025	98.8	0.64631	98.8	0.31	988	0.8585	988	0.71475	988	0.58469
989	0.6025	98.9	0.64669	98.9	0.31013	989	0.85844	989	0.7145	989	0.58519
990	0.60256	99	0.64688	99	0.31044	990	0.85831	990	0.71431	990	0.58594
991	0.60256	99.1	0.64706	99.1	0.31069	991	0.85825	991	0.71413	991	0.5865
992	0.60256	99.2	0.64725	99.2	0.31094	992	0.85819	992	0.71394	992	0.58706
993	0.60256	99.3	0.64756	99.3	0.311	993	0.85813	993	0.71388	993	0.58775
994	0.60256	99.4	0.64781	99.4	0.31125	994	0.85806	994	0.71369	994	0.58825
995	0.60256	99.5	0.64794	99.5	0.3115	995	0.858	995	0.71344	995	0.58894
996	0.60256	99.6	0.64819	99.6	0.31181	996	0.858	996	0.71325	996	0.58956
997	0.60256	99.7	0.64844	99.7	0.31194	997	0.85794	997	0.71306	997	0.59006
998	0.60256	99.8	0.64875	99.8	0.31206	998	0.85788	998	0.71294	998	0.59075
999	0.60256	99.9	0.64894	99.9	0.31231	999	0.85788	999	0.71281	999	0.59125
1000	0.60256	100	0.64906	100	0.31263	1000	0.85781	1000	0.71256	1000	0.59194
1001	0.60256	100.1	0.64931	100.1	0.31288	1001	0.85769	1001	0.71231	1001	0.5925
1002	0.60256	100.2	0.64963	100.2	0.313	1002	0.85763	1002	0.71213	1002	0.59306
1003	0.60256	100.3	0.64981	100.3	0.31313	1003	0.85756	1003	0.712	1003	0.59375
1004	0.60256	100.4	0.65	100.4	0.31344	1004	0.85744	1004	0.71188	1004	0.59425
1005	0.60256	100.5	0.65013	100.5	0.31369	1005	0.85738	1005	0.71169	1005	0.59494
1006	0.60256	100.6	0.65044	100.6	0.31388	1006	0.85725	1006	0.71144	1006	0.5955
1007	0.60256	100.7	0.65069	100.7	0.314	1007	0.85719	1007	0.71119	1007	0.596
1008	0.60263	100.8	0.65088	100.8	0.31413	1008	0.85713	1008	0.71106	1008	0.59675
1009	0.60263	100.9	0.65106	100.9	0.3145	1009	0.85706	1009	0.71094	1009	0.59719
1010	0.60263	101	0.65131	101	0.31475	1010	0.857	1010	0.71075	1010	0.59787
1011	0.60263	101.1	0.6515	101.1	0.31494	1011	0.857	1011	0.7105	1011	0.59844
1012	0.60263	101.2	0.65181	101.2	0.31506	1012	0.85694	1012	0.71025	1012	0.599
1013	0.60263	101.3	0.652	101.3	0.31525	1013	0.85688	1013	0.71006	1013	0.59969
1014	0.60263	101.4	0.65206	101.4	0.31556	1014	0.85681	1014	0.70994	1014	0.60013
1015	0.60263	101.5	0.65238	101.5	0.31581	1015	0.85675	1015	0.70981	1015	0.60088
1016	0.60263	101.6	0.65263	101.6	0.316	1016	0.85669	1016	0.70963	1016	0.60138
1017	0.60263	101.7	0.65288	101.7	0.31613	1017	0.85656	1017	0.70938	1017	0.602
1018	0.60263	101.8	0.653	101.8	0.31638	1018	0.8565	1018	0.70913	1018	0.60256
1019	0.60263	101.9	0.65319	101.9	0.31669	1019	0.85638	1019	0.709	1019	0.60306
1020	0.60263	102	0.65338	102	0.31688	1020	0.85631	1020	0.70888	1020	0.60381
1021	0.60263	102.1	0.65375	102.1	0.317	1021	0.85619	1021	0.70869	1021	0.60425
1022	0.60263	102.2	0.65388	102.2	0.31719	1022	0.85613	1022	0.70844	1022	0.60494
1023	0.60263	102.3	0.654	102.3	0.3175	1023	0.85606	1023	0.70819	1023	0.6055
1024	0.60263	102.4	0.65413	102.4	0.31781	1024	0.856	1024	0.708	1024	0.606
1025	0.60263	102.5	0.65444	102.5	0.31794	1025	0.856	1025	0.70788	1025	0.60669
1026	0.60263	102.6	0.65463	102.6	0.31806	1026	0.85594	1026	0.70769	1026	0.60719
1027	0.60269	102.7	0.65481	102.7	0.31825	1027	0.85588	1027	0.70744	1027	0.60788
1028	0.60269	102.8	0.655	102.8	0.31856	1028	0.85581	1028	0.70725	1028	0.60838
1029	0.60269	102.9	0.65519	102.9	0.31881	1029	0.85575	1029	0.70706	1029	0.60894
1030	0.60269	103	0.65531	103	0.31894	1030	0.85563	1030	0.70688	1030	0.60956
1031	0.60269	103.1	0.65569	103.1	0.31906	1031	0.85556	1031	0.70675	1031	0.61006
1032	0.60269	103.2	0.65588	103.2	0.31931	1032	0.85544	1032	0.7065	1032	0.61075
1033	0.60269	103.3	0.656	103.3	0.31963	1033	0.85538	1033	0.70625	1033	0.61119
1034	0.60269	103.4	0.65613	103.4	0.31981	1034	0.85525	1034	0.70606	1034	0.61188
1035	0.60269	103.5	0.65638	103.5	0.32	1035	0.85519	1035	0.70594	1035	0.61238
1036	0.60269	103.6	0.65669	103.6	0.32006	1036	0.85513	1036	0.70575	1036	0.61294
1037	0.60269	103.7	0.65681	103.7	0.32044	1037	0.85506	1037	0.7055	1037	0.61356
1038	0.60269	103.8	0.657	103.8	0.32069	1038	0.855	1038	0.70525	1038	0.61406
1039	0.60269	103.9	0.65713	103.9	0.32088	1039	0.85494	1039	0.70506	1039	0.61469
1040	0.60269	104	0.65731	104	0.321	1040	0.85488	1040	0.70494	1040	0.61513
1041	0.60269	104.1	0.65756	104.1	0.32119	1041	0.85481	1041	0.70475	1041	0.61581
1042	0.60269	104.2	0.65781	104.2	0.32144	1042	0.85481	1042	0.7045	1042	0.61625
1043	0.60269	104.3	0.65794	104.3	0.32181	1043	0.85469	1043	0.70425	1043	0.61694
1044	0.60269	104.4	0.65806	104.4	0.32194	1044	0.85463	1044	0.70406	1044	0.61744
1045	0.60269	104.5	0.65825	104.5	0.32206	1045	0.8545	1045	0.70388	1045	0.618
1046	0.60269	104.6	0.6585	104.6	0.32225	1046	0.85444	1046	0.70375	1046	0.61863
1047	0.60269	104.7	0.65875	104.7	0.32263	1047	0.85431	1047	0.7035	1047	0.61906
1048	0.60269	104.8	0.65888	104.8	0.32288	1048	0.85419	1048	0.70325	1048	0.61975
1049	0.60269	104.9	0.659	104.9	0.323	1049	0.85413	1049	0.70306	1049	0.62019
1050	0.60269	105	0.65913	105	0.32306	1050	0.85406	1050	0.70288	1050	0.62088
1051	0.60269	105.1	0.65938	105.1	0.32338	1051	0.854	1051	0.70269	1051	0.62131
1052	0.60269	105.2	0.65963	105.2	0.32363	1052	0.85394	1052	0.70244	1052	0.62194
1053	0.60269	105.3	0.65975	105.3	0.32388	1053	0.85394	1053	0.70219	1053	0.62238
1054	0.60269	105.4	0.65994	105.4	0.324	1054	0.85388	1054	0.702	1054	0.62294
1055	0.60269	105.5	0.66006	105.5	0.32419	1055	0.85381	1055	0.70188	1055	0.6235
1056	0.60269	105.6	0.66019	105.6	0.32444	1056	0.85369	1056	0.70169	1056	0.624
1057	0.60275	105.7	0.66044	105.7	0.32475	1057	0.85363	1057	0.70144	1057	0.62469
1058	0.60275	105.8	0.66063	105.8	0.32494	1058	0.85356	1058	0.70119	1058	0.62506
1059	0.60275	105.9	0.66088	105.9	0.32506	1059	0.85344	1059	0.701	1059	0.62575
1060	0.60275	106	0.66094	106	0.32519	1060	0.85331	1060	0.70088	1060	0.62619
1061	0.60275	106.1	0.66106	106.1	0.32556	1061	0.85325	1061	0.70069	1061	0.62688
1062	0.60275	106.2	0.66125	106.2	0.32581	1062	0.85313	1062	0.70044	1062	0.62725
1063	0.60275	106.3	0.6615	106.3	0.32594	1063	0.85306	1063	0.70013	1063	0.62788
1064	0.60275	106.4	0.66175	106.4	0.32606	1064	0.853	1064	0.7	1064	0.62838
1065	0.60275	106.5	0.66188	106.5	0.32631	1065	0.85294	1065	0.69981	1065	0.62894
1066	0.60275	106.6	0.662	106.6	0.32656	1066	0.85294	1066	0.69963	1066	0.62944
1067	0.60275	106.7	0.66213	106.7	0.32688	1067	0.85281	1067	0.69931	1067	0.63
1068	0.60275	106.8	0.66231	106.8	0.327	1068	0.85275	1068	0.69913	1068	0.6305
1069	0.60275	106.9	0.6625	106.9	0.32713	1069	0.85269	1069	0.69894	1069	0.631
1070	0.60275	107	0.66275	107	0.32744	1070	0.85256	1070	0.69875	1070	0.63163
1071	0.60275	107.1	0.66281	107.1	0.32769	1071	0.8525	1071	0.69856	1071	0.63206
1072	0.60275	107.2	0.663	107.2	0.32788	1072	0.85238	1072	0.69825	1072	0.63269
1073	0.60275	107.3	0.66306	107.3	0.328	1073	0.85225	1073	0.69806	1073	0.63306
1074	0.60275	107.4	0.66325	107.4	0.32825	1074	0.85219	1074	0.69788	1074	0.63375
1075	0.60275	107.5	0.6635	107.5	0.32844	1075	0.85206	1075	0.69775	1075	0.63413
1076	0.60275	107.6	0.66369	107.6	0.32881	1076	0.85206	1076	0.69744	1076	0.63481
1077	0.60275	107.7	0.66381	107.7	0.32894	1077	0.852	1077	0.69719	1077	0.63519
1078	0.60275	107.8	0.66394	107.8	0.32906	1078	0.85194	1078	0.697	1078	0.63588
1079	0.60275	107.9	0.66406	107.9	0.32925	1079	0.85188	1079	0.69688	1079	0.63625
1080	0.60275	108	0.66419	108	0.32963	1080	0.85181	1080	0.69669	1080	0.63688
1081	0.60275	108.1	0.66438	108.1	0.32988	1081	0.85169	1081	0.69638	1081	0.63731
1082	0.60275	108.2	0.66456	108.2	0.33	1082	0.85163	1082	0.69613	1082	0.63794
1083	0.60275	108.3	0.66475	108.3	0.33013	1083	0.8515	1083	0.69594	1083	0.63838
1084	0.60281	108.4	0.66494	108.4	0.33038	1084	0.85138	1084	0.69581	1084	0.63894
1085	0.60281	108.5	0.665	108.5	0.33069	1085	0.85125	1085	0.69556	1085	0.63938
1086	0.60281	108.6	0.66506	108.6	0.33088	1086	0.85119	1086	0.69531	1086	0.63994
1087	0.60281	108.7	0.66525	108.7	0.331	1087	0.85113	1087	0.69506	1087	0.64044
1088	0.60281	108.8	0.66544	108.8	0.33119	1088	0.85106	1088	0.69494	1088	0.64094
1089	0.60281	108.9	0.66569	108.9	0.33144	1089	0.851	1089	0.69475	1089	0.6415
1090	0.60281	109	0.66588	109	0.33175	1090	0.85094	1090	0.6945	1090	0.642
1091	0.60281	109.1	0.66594	109.1	0.33194	1091	0.85088	1091	0.69419	1091	0.6425
1092	0.60281	109.2	0.666	109.2	0.33206	1092	0.85081	1092	0.694	1092	0.643
1093	0.60281	109.3	0.66619	109.3	0.33225	1093	0.85075	1093	0.69388	1093	0.64356
1094	0.60281	109.4	0.66638	109.4	0.33256	1094	0.85063	1094	0.69363	1094	0.644
1095	0.60281	109.5	0.6665	109.5	0.33281	1095	0.85056	1095	0.69338	1095	0.64456
1096	0.60281	109.6	0.66669	109.6	0.33294	1096	0.85038	1096	0.69313	1096	0.645
1097	0.60281	109.7	0.66681	109.7	0.33306	1097	0.85031	1097	0.69294	1097	0.64556
1098	0.60281	109.8	0.66694	109.8	0.33331	1098	0.85019	1098	0.69281	1098	0.646
1099	0.60281	109.9	0.66706	109.9	0.33363	1099	0.85013	1099	0.69256	1099	0.64656
1100	0.60281	110	0.66719	110	0.33388	1100	0.85006	1100	0.69225	1100	0.647
1101	0.60281	110.1	0.66731	110.1	0.334	1101	0.85	1101	0.69206	1101	0.64756
1102	0.60281	110.2	0.66756	110.2	0.33406	1102	0.84994	1102	0.69194	1102	0.648
1103	0.60281	110.3	0.66775	110.3	0.33431	1103	0.84988	1103	0.69175	1103	0.64856
1104	0.60281	110.4	0.66788	110.4	0.33463	1104	0.84981	1104	0.69144	1104	0.649
1105	0.60281	110.5	0.668	110.5	0.33488	1105	0.84975	1105	0.69119	1105	0.64956
1106	0.60281	110.6	0.66806	110.6	0.335	1106	0.84963	1106	0.691	1106	0.65
1107	0.60281	110.7	0.66819	110.7	0.33513	1107	0.8495	1107	0.69088	1107	0.65056
1108	0.60288	110.8	0.66831	110.8	0.33538	1108	0.84938	1108	0.69063	1108	0.651
1109	0.60288	110.9	0.66844	110.9	0.33575	1109	0.84925	1109	0.69038	1109	0.6515
1110	0.60288	111	0.66869	111	0.33588	1110	0.84919	1110	0.69013	1110	0.652
1111	0.60288	111.1	0.66881	111.1	0.336	1111	0.84913	1111	0.68994	1111	0.6525
1112	0.60288	111.2	0.66894	111.2	0.33613	1112	0.84906	1112	0.68981	1112	0.653
1113	0.60288	111.3	0.669	111.3	0.3365	1113	0.849	1113	0.68956	1113	0.6535
1114	0.60288	111.4	0.66906	111.4	0.33675	1114	0.84894	1114	0.68925	1114	0.65394
1115	0.60288	111.5	0.66925	111.5	0.33694	1115	0.84888	1115	0.68906	1115	0.65438
1116	0.60288	111.6	0.66938	111.6	0.337	1116	0.84881	1116	0.68888	1116	0.65494
1117	0.60288	111.7	0.66963	111.7	0.33725	1117	0.84869	1117	0.68869	1117	0.65538
1118	0.60288	111.8	0.66975	111.8	0.3375	1118	0.84863	1118	0.68844	1118	0.65594
1119	0.60288	111.9	0.66988	111.9	0.33781	1119	0.8485	1119	0.68813	1119	0.65631
1120	0.60288	112	0.66994	112	0.33794	1120	0.84838	1120	0.688	1120	0.65688
1121	0.60288	112.1	0.67006	112.1	0.33806	1121	0.84825	1121	0.68781	1121	0.65725
1122	0.60288	112.2	0.67013	112.2	0.33825	1122	0.84819	1122	0.68756	1122	0.65788
1123	0.60288	112.3	0.67025	112.3	0.33863	1123	0.84813	1123	0.68731	1123	0.65825
1124	0.60288	112.4	0.67038	112.4	0.33888	1124	0.84806	1124	0.68713	1124	0.65881
1125	0.60288	112.5	0.67063	112.5	0.339	1125	0.848	1125	0.68694	1125	0.65919
1126	0.60288	112.6	0.67075	112.6	0.33906	1126	0.84794	1126	0.68675	1126	0.65981
1127	0.60288	112.7	0.67088	112.7	0.33938	1127	0.84788	1127	0.6865	1127	0.66013
1128	0.60288	112.8	0.67094	112.8	0.33969	1128	0.84781	1128	0.68625	1128	0.66075
1129	0.60288	112.9	0.671	112.9	0.33988	1129	0.84769	1129	0.68606	1129	0.66113
1130	0.60288	113	0.67106	113	0.34	1130	0.84763	1130	0.68594	1130	0.66169
1131	0.60294	113.1	0.67125	113.1	0.34019	1131	0.8475	1131	0.68575	1131	0.66206
1132	0.60294	113.2	0.67138	113.2	0.34044	1132	0.84738	1132	0.6855	1132	0.66263
1133	0.60288	113.3	0.67156	113.3	0.34075	1133	0.84725	1133	0.68525	1133	0.663
1134	0.60294	113.4	0.67169	113.4	0.34094	1134	0.84719	1134	0.685	1134	0.6635
1135	0.60294	113.5	0.67181	113.5	0.34106	1135	0.84706	1135	0.68488	1135	0.664
1136	0.60294	113.6	0.67188	113.6	0.34119	1136	0.847	1136	0.68469	1136	0.66444
1137	0.60294	113.7	0.67194	113.7	0.34156	1137	0.847	1137	0.68438	1137	0.66494
1138	0.60294	113.8	0.67206	113.8	0.34181	1138	0.84694	1138	0.68413	1138	0.66538
1139	0.60294	113.9	0.67219	113.9	0.34194	1139	0.84688	1139	0.684	1139	0.66588
1140	0.60294	114	0.67225	114	0.34206	1140	0.84675	1140	0.68381	1140	0.66625
1141	0.60294	114.1	0.6725	114.1	0.34231	1141	0.84669	1141	0.68356	1141	0.66681
1142	0.60294	114.2	0.67256	114.2	0.34256	1142	0.84656	1142	0.68331	1142	0.66719
1143	0.60294	114.3	0.67275	114.3	0.34288	1143	0.84644	1143	0.68313	1143	0.66781
1144	0.60294	114.4	0.67288	114.4	0.343	1144	0.84638	1144	0.68294	1144	0.66813
1145	0.60294	114.5	0.67294	114.5	0.34306	1145	0.84625	1145	0.68275	1145	0.66869
1146	0.60294	114.6	0.673	114.6	0.34338	1146	0.84613	1146	0.68256	1146	0.66906
1147	0.60294	114.7	0.67306	114.7	0.34363	1147	0.84606	1147	0.68225	1147	0.66963
1148	0.60294	114.8	0.67319	114.8	0.34388	1148	0.846	1148	0.68206	1148	0.67
1149	0.60294	114.9	0.67325	114.9	0.344	1149	0.84594	1149	0.68194	1149	0.6705
1150	0.60294	115	0.67344	115	0.34413	1150	0.84594	1150	0.68175	1150	0.67094
1151	0.60294	115.1	0.67356	115.1	0.34438	1151	0.84588	1151	0.6815	1151	0.67138
1152	0.60294	115.2	0.67375	115.2	0.34475	1152	0.84581	1152	0.68125	1152	0.67188
1153	0.60294	115.3	0.67381	115.3	0.34494	1153	0.84569	1153	0.68106	1153	0.67225
1154	0.60294	115.4	0.67388	115.4	0.345	1154	0.84563	1154	0.68088	1154	0.67281
1155	0.60294	115.5	0.674	115.5	0.34519	1155	0.8455	1155	0.68069	1155	0.67313
1156	0.60294	115.6	0.674	115.6	0.34556	1156	0.84538	1156	0.68044	1156	0.67369
1157	0.60294	115.7	0.67413	115.7	0.34575	1157	0.84525	1157	0.68019	1157	0.67406
1158	0.60294	115.8	0.67419	115.8	0.34594	1158	0.84519	1158	0.68	1158	0.67456
1159	0.60294	115.9	0.67438	115.9	0.34606	1159	0.84506	1159	0.67988	1159	0.675
1160	0.60294	116	0.67444	116	0.34619	1160	0.845	1160	0.67969	1160	0.67544
1161	0.60294	116.1	0.67463	116.1	0.3465	1161	0.845	1161	0.67938	1161	0.67594
1162	0.60294	116.2	0.67475	116.2	0.34681	1162	0.84494	1162	0.67919	1162	0.67631
1163	0.60294	116.3	0.67481	116.3	0.34694	1163	0.84488	1163	0.679	1163	0.67681
1164	0.60294	116.4	0.67494	116.4	0.34706	1164	0.84481	1164	0.67881	1164	0.67713
1165	0.60294	116.5	0.67494	116.5	0.34725	1165	0.84469	1165	0.67863	1165	0.67775
1166	0.60294	116.6	0.675	116.6	0.34763	1166	0.84463	1166	0.67838	1166	0.67806
1167	0.60294	116.7	0.67506	116.7	0.34788	1167	0.8445	1167	0.67813	1167	0.67856
1168	0.60294	116.8	0.67519	116.8	0.34794	1168	0.84438	1168	0.678	1168	0.679
1169	0.60294	116.9	0.67525	116.9	0.34813	1169	0.84425	1169	0.67781	1169	0.67938
1170	0.60294	117	0.67544	117	0.34838	1170	0.84413	1170	0.67763	1170	0.67988
1171	0.603	117.1	0.6755	117.1	0.34869	1171	0.84406	1171	0.67738	1171	0.68025
1172	0.603	117.2	0.67569	117.2	0.34888	1172	0.844	1172	0.67713	1172	0.68081
1173	0.603	117.3	0.67575	117.3	0.349	1173	0.84394	1173	0.67694	1173	0.68113
1174	0.603	117.4	0.67588	117.4	0.34913	1174	0.84388	1174	0.67681	1174	0.68163
1175	0.603	117.5	0.67594	117.5	0.34944	1175	0.84388	1175	0.67663	1175	0.682
1176	0.603	117.6	0.676	117.6	0.34975	1176	0.84375	1176	0.67631	1176	0.68244
1177	0.603	117.7	0.676	117.7	0.34988	1177	0.84369	1177	0.67613	1177	0.68294
1178	0.603	117.8	0.67613	117.8	0.35	1178	0.84356	1178	0.67594	1178	0.68331
1179	0.603	117.9	0.67613	117.9	0.35019	1179	0.84344	1179	0.67581	1179	0.68381
1180	0.603	118	0.67625	118	0.3505	1180	0.84331	1180	0.67563	1180	0.68413
1181	0.603	118.1	0.67631	118.1	0.35075	1181	0.84325	1181	0.67531	1181	0.68469
1182	0.603	118.2	0.6765	118.2	0.35094	1182	0.84313	1182	0.67513	1182	0.685
1183	0.603	118.3	0.67656	118.3	0.35106	1183	0.84306	1183	0.67494	1183	0.6855
1184	0.603	118.4	0.67675	118.4	0.35125	1184	0.843	1184	0.67481	1184	0.68594
1185	0.603	118.5	0.67681	118.5	0.3515	1185	0.84294	1185	0.67463	1185	0.68619
1186	0.603	118.6	0.67688	118.6	0.35181	1186	0.84288	1186	0.67431	1186	0.68681
1187	0.603	118.7	0.67694	118.7	0.35194	1187	0.84281	1187	0.67413	1187	0.68706
1188	0.603	118.8	0.677	118.8	0.35206	1188	0.84275	1188	0.67394	1188	0.68763
1189	0.603	118.9	0.677	118.9	0.35219	1189	0.84269	1189	0.67381	1189	0.688
1190	0.603	119	0.67706	119	0.35256	1190	0.84256	1190	0.67363	1190	0.68838
1191	0.603	119.1	0.67713	119.1	0.35281	1191	0.84244	1191	0.67338	1191	0.68888
1192	0.603	119.2	0.67725	119.2	0.35294	1192	0.84231	1192	0.67313	1192	0.68919
1193	0.603	119.3	0.67731	119.3	0.35306	1193	0.84219	1193	0.673	1193	0.68975
1194	0.603	119.4	0.67744	119.4	0.35331	1194	0.84213	1194	0.67281	1194	0.69006
1195	0.603	119.5	0.6775	119.5	0.35356	1195	0.84206	1195	0.67263	1195	0.69056
1196	0.60306	119.6	0.67763	119.6	0.35388	1196	0.842	1196	0.67238	1196	0.69094
1197	0.60306	119.7	0.67769	119.7	0.35394	1197	0.84194	1197	0.67213	1197	0.69131
1198	0.60306	119.8	0.67781	119.8	0.35413	1198	0.84194	1198	0.672	1198	0.69181
1199	0.60306	119.9	0.67788	119.9	0.35431	1199	0.84181	1199	0.67181	1199	0.69213
1200	0.60306	120	0.67788	120	0.35463	1200	0.84175	1200	0.67163	1200	0.69263
1201	0.60306	120.1	0.67794	120.1	0.35488	1201	0.84163	1201	0.67138	1201	0.693
1202	0.60306	120.2	0.678	120.2	0.355	1202	0.84156	1202	0.67113	1202	0.69344
1203	0.60306	120.3	0.678	120.3	0.35506	1203	0.84144	1203	0.671	1203	0.69388
1204	0.60306	120.4	0.67813	120.4	0.35538	1204	0.84131	1204	0.67088	1204	0.69419
1205	0.60306	120.5	0.67813	120.5	0.35563	1205	0.84125	1205	0.67069	1205	0.69475
1206	0.60306	120.6	0.67825	120.6	0.35588	1206	0.84113	1206	0.67044	1206	0.695
1207	0.60306	120.7	0.67825	120.7	0.356	1207	0.84106	1207	0.67019	1207	0.6955
1208	0.60306	120.8	0.67838	120.8	0.35619	1208	0.841	1208	0.67006	1208	0.69594
1209	0.60306	120.9	0.67844	120.9	0.35638	1209	0.84094	1209	0.66988	1209	0.69625
1210	0.60306	121	0.67856	121	0.35675	1210	0.84094	1210	0.66975	1210	0.69675
1211	0.60306	121.1	0.67863	121.1	0.35688	1211	0.84088	1211	0.6695	1211	0.69706
1212	0.60306	121.2	0.67869	121.2	0.357	1212	0.84075	1212	0.66925	1212	0.69756
1213	0.60306	121.3	0.67875	121.3	0.35713	1213	0.84069	1213	0.66906	1213	0.69794
1214	0.60306	121.4	0.67881	121.4	0.35744	1214	0.84056	1214	0.66894	1214	0.69825
1215	0.60306	121.5	0.67888	121.5	0.35769	1215	0.8405	1215	0.66881	1215	0.69881
1216	0.60306	121.6	0.67888	121.6	0.35788	1216	0.84038	1216	0.66856	1216	0.69906
1217	0.60313	121.7	0.67894	121.7	0.358	1217	0.84025	1217	0.66831	1217	0.69956
1218	0.60313	121.8	0.679	121.8	0.35819	1218	0.84013	1218	0.66813	1218	0.69994
1219	0.60313	121.9	0.67906	121.9	0.35844	1219	0.84006	1219	0.668	1219	0.70031
1220	0.60313	122	0.67906	122	0.35875	1220	0.84	1220	0.66788	1220	0.70081
1221	0.60313	122.1	0.67913	122.1	0.35894	1221	0.83994	1221	0.66769	1221	0.70113
1222	0.60313	122.2	0.67913	122.2	0.35906	1222	0.83994	1222	0.66744	1222	0.70163
1223	0.60313	122.3	0.67931	122.3	0.35919	1223	0.83988	1223	0.66719	1223	0.70194
1224	0.60313	122.4	0.67931	122.4	0.3595	1224	0.83975	1224	0.66706	1224	0.70225
1225	0.60313	122.5	0.67944	122.5	0.35975	1225	0.83969	1225	0.66688	1225	0.70281
1226	0.60313	122.6	0.67944	122.6	0.35994	1226	0.83956	1226	0.66675	1226	0.70306
1227	0.60313	122.7	0.67956	122.7	0.36	1227	0.83944	1227	0.6665	1227	0.70356
1228	0.60313	122.8	0.67963	122.8	0.36025	1228	0.83931	1228	0.66625	1228	0.70394
1229	0.60313	122.9	0.67969	122.9	0.3605	1229	0.83925	1229	0.66606	1229	0.70425
1230	0.60313	123	0.67975	123	0.36081	1230	0.83913	1230	0.66594	1230	0.70475
1231	0.60313	123.1	0.67981	123.1	0.36094	1231	0.83906	1231	0.66581	1231	0.70506
1232	0.60313	123.2	0.67981	123.2	0.36106	1232	0.839	1232	0.66563	1232	0.7055
1233	0.60313	123.3	0.67988	123.3	0.36119	1233	0.83894	1233	0.66538	1233	0.70594
1234	0.60313	123.4	0.67988	123.4	0.36156	1234	0.83894	1234	0.66519	1234	0.70619
1235	0.60313	123.5	0.67994	123.5	0.36181	1235	0.83888	1235	0.665	1235	0.70675
1236	0.60313	123.6	0.68	123.6	0.36194	1236	0.83875	1236	0.66488	1236	0.707
1237	0.60313	123.7	0.68	123.7	0.362	1237	0.83869	1237	0.66475	1237	0.70744
1238	0.60313	123.8	0.68006	123.8	0.36225	1238	0.83863	1238	0.6645	1238	0.70788
1239	0.60313	123.9	0.68013	123.9	0.3625	1239	0.8385	1239	0.66431	1239	0.70813
1240	0.60313	124	0.68013	124	0.36281	1240	0.83838	1240	0.66413	1240	0.70869
1241	0.60313	124.1	0.68019	124.1	0.36294	1241	0.83825	1241	0.66394	1241	0.709
1242	0.60313	124.2	0.68019	124.2	0.36306	1242	0.83819	1242	0.66381	1242	0.70931
1243	0.60313	124.3	0.68031	124.3	0.36325	1243	0.83813	1243	0.66369	1243	0.70981
1244	0.60313	124.4	0.68031	124.4	0.36356	1244	0.83806	1244	0.66344	1244	0.71006
1245	0.60313	124.5	0.68044	124.5	0.36381	1245	0.838	1245	0.66319	1245	0.71056
1246	0.60313	124.6	0.68044	124.6	0.364	1246	0.83794	1246	0.66306	1246	0.71094
1247	0.60313	124.7	0.68056	124.7	0.36406	1247	0.83788	1247	0.66294	1247	0.71125
1248	0.60313	124.8	0.6805	124.8	0.36431	1248	0.83781	1248	0.66275	1248	0.71175
1249	0.60313	124.9	0.68063	124.9	0.36463	1249	0.83775	1249	0.66256	1249	0.712
1250	0.60313	125	0.68075	125	0.36481	1250	0.83763	1250	0.66238	1250	0.71244
1251	0.60313	125.1	0.68075	125.1	0.365	1251	0.83756	1251	0.66213	1251	0.71288
1252	0.60313	125.2	0.68081	125.2	0.36506	1252	0.83744	1252	0.662	1252	0.71313
1253	0.60313	125.3	0.68081	125.3	0.36531	1253	0.83731	1253	0.66188	1253	0.71363
1254	0.60313	125.4	0.68088	125.4	0.36563	1254	0.83725	1254	0.66175	1254	0.71394
1255	0.60313	125.5	0.68088	125.5	0.36581	1255	0.83713	1255	0.66156	1255	0.71425
1256	0.60313	125.6	0.68094	125.6	0.36594	1256	0.83706	1256	0.66131	1256	0.71475
1257	0.60313	125.7	0.68094	125.7	0.366	1257	0.837	1257	0.66113	1257	0.715
1258	0.60319	125.8	0.681	125.8	0.36619	1258	0.83694	1258	0.661	1258	0.71544
1259	0.60319	125.9	0.68094	125.9	0.3665	1259	0.83688	1259	0.66088	1259	0.71588
1260	0.60319	126	0.681	126	0.36675	1260	0.83681	1260	0.66069	1260	0.71613
1261	0.60319	126.1	0.68106	126.1	0.36694	1261	0.83675	1261	0.6605	1261	0.71663
1262	0.60319	126.2	0.681	126.2	0.367	1262	0.83669	1262	0.66031	1262	0.71694
1263	0.60319	126.3	0.68106	126.3	0.36719	1263	0.83656	1263	0.66013	1263	0.71725
1264	0.60319	126.4	0.68106	126.4	0.3675	1264	0.8365	1264	0.66	1264	0.71775
1265	0.60319	126.5	0.68119	126.5	0.36775	1265	0.83638	1265	0.65988	1265	0.718
1266	0.60319	126.6	0.68113	126.6	0.36794	1266	0.83625	1266	0.65969	1266	0.71831
1267	0.60319	126.7	0.68119	126.7	0.36806	1267	0.83619	1267	0.6595	1267	0.71881
1268	0.60319	126.8	0.68119	126.8	0.36825	1268	0.83613	1268	0.65931	1268	0.71906
1269	0.60319	126.9	0.68131	126.9	0.3685	1269	0.83606	1269	0.65913	1269	0.7195
1270	0.60319	127	0.68125	127	0.36881	1270	0.836	1270	0.659	1270	0.71988
1271	0.60319	127.1	0.68138	127.1	0.36894	1271	0.83594	1271	0.65888	1271	0.72013
1272	0.60319	127.2	0.68131	127.2	0.36906	1272	0.83588	1272	0.65875	1272	0.72063
1273	0.60325	127.3	0.68144	127.3	0.36919	1273	0.83581	1273	0.6585	1273	0.72094
1274	0.60319	127.4	0.68144	127.4	0.36956	1274	0.83575	1274	0.65831	1274	0.72125
1275	0.60319	127.5	0.68156	127.5	0.36981	1275	0.83563	1275	0.65813	1275	0.72175
1276	0.60319	127.6	0.6815	127.6	0.36994	1276	0.83556	1276	0.658	1276	0.722
1277	0.60325	127.7	0.68156	127.7	0.37	1277	0.83544	1277	0.65788	1277	0.72238
1278	0.60325	127.8	0.68156	127.8	0.37025	1278	0.83531	1278	0.65775	1278	0.72281
1279	0.60319	127.9	0.68163	127.9	0.3705	1279	0.83525	1279	0.65756	1279	0.72306
1280	0.60325	128	0.68169	128	0.37081	1280	0.83513	1280	0.65731	1280	0.7235
1281	0.60319	128.1	0.68169	128.1	0.37094	1281	0.83506	1281	0.65713	1281	0.72388
1282	0.60319	128.2	0.68175	128.2	0.37106	1282	0.835	1282	0.657	1282	0.72413
1283	0.60319	128.3	0.68175	128.3	0.37119	1283	0.835	1283	0.65694	1283	0.72456
1284	0.60325	128.4	0.68175	128.4	0.37156	1284	0.83494	1284	0.65675	1284	0.72494
1285	0.60325	128.5	0.68181	128.5	0.37175	1285	0.83488	1285	0.65663	1285	0.72519
1286	0.60319	128.6	0.68181	128.6	0.37194	1286	0.83481	1286	0.65638	1286	0.72569
1287	0.60325	128.7	0.68188	128.7	0.372	1287	0.83469	1287	0.65619	1287	0.726
1288	0.60325	128.8	0.68188	128.8	0.37225	1288	0.83463	1288	0.65606	1288	0.72625
1289	0.60325	128.9	0.68188	128.9	0.37244	1289	0.8345	1289	0.65594	1289	0.72675
1290	0.60325	129	0.68188	129	0.37281	1290	0.83444	1290	0.65581	1290	0.727
1291	0.60325	129.1	0.68188	129.1	0.37294	1291	0.83431	1291	0.65563	1291	0.72738
1292	0.60325	129.2	0.68194	129.2	0.37306	1292	0.83419	1292	0.65544	1292	0.72781
1293	0.60325	129.3	0.68194	129.3	0.37319	1293	0.83413	1293	0.65525	1293	0.72806
1294	0.60325	129.4	0.68194	129.4	0.3735	1294	0.83406	1294	0.65506	1294	0.72844
1295	0.60325	129.5	0.68194	129.5	0.37375	1295	0.834	1295	0.655	1295	0.72888
1296	0.60325	129.6	0.68194	129.6	0.37388	1296	0.83394	1296	0.65488	1296	0.72906
1297	0.60325	129.7	0.68194	129.7	0.374	1297	0.83394	1297	0.65469	1297	0.72956
1298	0.60325	129.8	0.682	129.8	0.37419	1298	0.83388	1298	0.6545	1298	0.72988
1299	0.60325	129.9	0.682	129.9	0.37444	1299	0.83381	1299	0.65431	1299	0.73013
1300	0.60325	130	0.682	130	0.37475	1300	0.83369	1300	0.65413	1300	0.73056
1301	0.60325	130.1	0.682	130.1	0.37494	1301	0.83363	1301	0.654	1301	0.73094
1302	0.60325	130.2	0.682	130.2	0.375	1302	0.8335	1302	0.65394	1302	0.73119
1303	0.60325	130.3	0.682	130.3	0.37513	1303	0.83338	1303	0.65381	1303	0.73163
1304	0.60325	130.4	0.682	130.4	0.37544	1304	0.83331	1304	0.65369	1304	0.73194
1305	0.60325	130.5	0.682	130.5	0.37569	1305	0.83319	1305	0.6535	1305	0.73219
1306	0.60325	130.6	0.682	130.6	0.37588	1306	0.83313	1306	0.65331	1306	0.73269
1307	0.60325	130.7	0.68206	130.7	0.376	1307	0.83306	1307	0.65313	1307	0.73294
1308	0.60325	130.8	0.68206	130.8	0.37613	1308	0.833	1308	0.653	1308	0.73325
1309	0.60325	130.9	0.68206	130.9	0.37638	1309	0.83294	1309	0.65294	1309	0.73369
1310	0.60325	131	0.68206	131	0.37669	1310	0.83294	1310	0.65281	1310	0.734
1311	0.60325	131.1	0.68206	131.1	0.37688	1311	0.83288	1311	0.65263	1311	0.73425
1312	0.60325	131.2	0.68206	131.2	0.377	1312	0.83281	1312	0.65244	1312	0.73475
1313	0.60325	131.3	0.68206	131.3	0.37706	1313	0.83275	1313	0.65225	1313	0.735
1314	0.60325	131.4	0.68206	131.4	0.37738	1314	0.83263	1314	0.65213	1314	0.73531
1315	0.60325	131.5	0.68206	131.5	0.37763	1315	0.8325	1315	0.652	1315	0.73575
1316	0.60325	131.6	0.68206	131.6	0.37788	1316	0.83244	1316	0.65188	1316	0.736
1317	0.60325	131.7	0.68206	131.7	0.37794	1317	0.83231	1317	0.65175	1317	0.73631
1318	0.60319	131.8	0.68206	131.8	0.37806	1318	0.83219	1318	0.65163	1318	0.73675
1319	0.60325	131.9	0.68206	131.9	0.37831	1319	0.83213	1319	0.65144	1319	0.737
1320	0.60319	132	0.68206	132	0.37863	1320	0.83206	1320	0.65125	1320	0.73731
1321	0.60319	132.1	0.68213	132.1	0.37888	1321	0.832	1321	0.65113	1321	0.73781
1322	0.60325	132.2	0.68213	132.2	0.37894	1322	0.83194	1322	0.651	1322	0.738
1323	0.60319	132.3	0.68206	132.3	0.37906	1323	0.83194	1323	0.65088	1323	0.73838
1324	0.60325	132.4	0.68213	132.4	0.37931	1324	0.83188	1324	0.65081	1324	0.73881
1325	0.60325	132.5	0.68206	132.5	0.37963	1325	0.83181	1325	0.65063	1325	0.739
1326	0.60325	132.6	0.68213	132.6	0.37981	1326	0.83175	1326	0.65044	1326	0.73931
1327	0.60325	132.7	0.68206	132.7	0.37994	1327	0.83163	1327	0.65025	1327	0.73975
1328	0.60325	132.8	0.68206	132.8	0.38006	1328	0.83156	1328	0.65013	1328	0.74
1329	0.60325	132.9	0.68206	132.9	0.38019	1329	0.83144	1329	0.65	1329	0.74031
1330	0.60325	133	0.68206	133	0.3805	1330	0.83131	1330	0.64994	1330	0.74075
1331	0.60325	133.1	0.68206	133.1	0.38075	1331	0.83125	1331	0.64981	1331	0.741
1332	0.60325	133.2	0.68206	133.2	0.38094	1332	0.83113	1332	0.64969	1332	0.74131
1333	0.60325	133.3	0.68206	133.3	0.381	1333	0.83106	1333	0.6495	1333	0.74175
1334	0.60325	133.4	0.68206	133.4	0.38119	1334	0.831	1334	0.64931	1334	0.742
1335	0.60325	133.5	0.68206	133.5	0.3815	1335	0.831	1335	0.64919	1335	0.74225
1336	0.60325	133.6	0.68206	133.6	0.38175	1336	0.83094	1336	0.64906	1336	0.74269
1337	0.60325	133.7	0.68206	133.7	0.38194	1337	0.83088	1337	0.64894	1337	0.74294
1338	0.60325	133.8	0.68206	133.8	0.382	1338	0.83081	1338	0.64888	1338	0.74325
1339	0.60325	133.9	0.68206	133.9	0.38213	1339	0.83081	1339	0.64875	1339	0.74369
1340	0.60325	134	0.68206	134	0.38231	1340	0.83069	1340	0.64856	1340	0.74394
1341	0.60325	134.1	0.68206	134.1	0.38269	1341	0.83063	1341	0.64838	1341	0.74419
1342	0.60325	134.2	0.68206	134.2	0.38288	1342	0.8305	1342	0.64825	1342	0.74463
1343	0.60325	134.3	0.682	134.3	0.38294	1343	0.83038	1343	0.64813	1343	0.74494
1344	0.60325	134.4	0.682	134.4	0.38313	1344	0.83031	1344	0.648	1344	0.74513
1345	0.60325	134.5	0.682	134.5	0.38331	1345	0.83019	1345	0.64794	1345	0.74556
1346	0.60325	134.6	0.682	134.6	0.38363	1346	0.83013	1346	0.64781	1346	0.74588
1347	0.60325	134.7	0.682	134.7	0.38381	1347	0.83006	1347	0.64769	1347	0.74613
1348	0.60325	134.8	0.682	134.8	0.38394	1348	0.83	1348	0.6475	1348	0.7465
1349	0.60325	134.9	0.682	134.9	0.38406	1349	0.82994	1349	0.64738	1349	0.74688
1350	0.60325	135	0.682	135	0.38431	1350	0.82994	1350	0.64719	1350	0.74706
1351	0.60325	135.1	0.68194	135.1	0.38456	1351	0.82988	1351	0.64706	1351	0.74744
1352	0.60325	135.2	0.68194	135.2	0.38481	1352	0.82981	1352	0.647	1352	0.74781
1353	0.60325	135.3	0.68194	135.3	0.38494	1353	0.82975	1353	0.64688	1353	0.748
1354	0.60325	135.4	0.68194	135.4	0.38506	1354	0.82969	1354	0.64681	1354	0.74831
1355	0.60325	135.5	0.68194	135.5	0.38519	1355	0.82963	1355	0.64663	1355	0.74875
1356	0.60325	135.6	0.68194	135.6	0.38556	1356	0.8295	1356	0.6465	1356	0.749
1357	0.60325	135.7	0.68194	135.7	0.38575	1357	0.82938	1357	0.64631	1357	0.74925
1358	0.60325	135.8	0.68194	135.8	0.38594	1358	0.82931	1358	0.64619	1358	0.74969
1359	0.60325	135.9	0.68188	135.9	0.386	1359	0.82919	1359	0.64606	1359	0.74994
1360	0.60325	136	0.68188	136	0.38619	1360	0.82913	1360	0.646	1360	0.75013
1361	0.60325	136.1	0.68188	136.1	0.38638	1361	0.82906	1361	0.64588	1361	0.7505
1362	0.60325	136.2	0.68188	136.2	0.38675	1362	0.829	1362	0.64575	1362	0.75088
1363	0.60325	136.3	0.68181	136.3	0.38694	1363	0.829	1363	0.64563	1363	0.75106
1364	0.60325	136.4	0.68188	136.4	0.387	1364	0.82894	1364	0.6455	1364	0.75144
1365	0.60325	136.5	0.68181	136.5	0.38713	1365	0.82888	1365	0.64531	1365	0.75181
1366	0.60325	136.6	0.68181	136.6	0.38738	1366	0.82881	1366	0.64519	1366	0.752
1367	0.60325	136.7	0.68175	136.7	0.38763	1367	0.82875	1367	0.64506	1367	0.75231
1368	0.60325	136.8	0.68181	136.8	0.38781	1368	0.82869	1368	0.645	1368	0.75275
1369	0.60325	136.9	0.68175	136.9	0.38794	1369	0.82856	1369	0.64488	1369	0.75294
1370	0.60325	137	0.68175	137	0.38806	1370	0.82844	1370	0.64481	1370	0.75319
1371	0.60325	137.1	0.68169	137.1	0.38831	1371	0.82838	1371	0.64463	1371	0.75363
1372	0.60325	137.2	0.68169	137.2	0.3885	1372	0.82825	1372	0.6445	1372	0.75394
1373	0.60325	137.3	0.68169	137.3	0.38881	1373	0.82819	1373	0.64431	1373	0.75413
1374	0.60325	137.4	0.68163	137.4	0.38894	1374	0.82813	1374	0.64419	1374	0.7545
1375	0.60319	137.5	0.68156	137.5	0.38906	1375	0.82806	1375	0.64406	1375	0.75481
1376	0.60325	137.6	0.68156	137.6	0.38919	1376	0.828	1376	0.644	1376	0.755
1377	0.60325	137.7	0.6815	137.7	0.3895	1377	0.82794	1377	0.64388	1377	0.75531
1378	0.60325	137.8	0.6815	137.8	0.38975	1378	0.82794	1378	0.64381	1378	0.75575
1379	0.60319	137.9	0.6815	137.9	0.38994	1379	0.82788	1379	0.64369	1379	0.75594
1380	0.60325	138	0.68144	138	0.39	1380	0.82781	1380	0.64356	1380	0.75619
1381	0.60325	138.1	0.68138	138.1	0.39013	1381	0.82775	1381	0.64338	1381	0.75656
1382	0.60325	138.2	0.68138	138.2	0.39038	1382	0.82769	1382	0.64325	1382	0.75688
1383	0.60325	138.3	0.68131	138.3	0.39069	1383	0.82756	1383	0.64313	1383	0.75706
1384	0.60325	138.4	0.68125	138.4	0.39088	1384	0.8275	1384	0.643	1384	0.75744
1385	0.60325	138.5	0.68125	138.5	0.391	1385	0.82738	1385	0.64294	1385	0.75781
1386	0.60325	138.6	0.68125	138.6	0.39106	1386	0.82731	1386	0.64288	1386	0.758
1387	0.60325	138.7	0.68119	138.7	0.39131	1387	0.82719	1387	0.64275	1387	0.75825
1388	0.60325	138.8	0.68113	138.8	0.39156	1388	0.82713	1388	0.64263	1388	0.75863
1389	0.60325	138.9	0.68113	138.9	0.39181	1389	0.82706	1389	0.64244	1389	0.75894
1390	0.60319	139	0.68113	139	0.39194	1390	0.827	1390	0.64231	1390	0.75913
1391	0.60325	139.1	0.68106	139.1	0.39206	1391	0.827	1391	0.64219	1391	0.7595
1392	0.60319	139.2	0.68106	139.2	0.39219	1392	0.82694	1392	0.64206	1392	0.75981
1393	0.60325	139.3	0.681	139.3	0.3925	1393	0.82688	1393	0.642	1393	0.76
1394	0.60325	139.4	0.681	139.4	0.39275	1394	0.82688	1394	0.64188	1394	0.76025
1395	0.60325	139.5	0.681	139.5	0.39288	1395	0.82681	1395	0.64181	1395	0.76069
1396	0.60325	139.6	0.681	139.6	0.393	1396	0.82669	1396	0.64169	1396	0.76094
1397	0.60325	139.7	0.68094	139.7	0.39319	1397	0.82663	1397	0.64156	1397	0.76113
1398	0.60325	139.8	0.68094	139.8	0.39331	1398	0.82656	1398	0.64138	1398	0.7615
1399	0.60325	139.9	0.68088	139.9	0.39369	1399	0.82644	1399	0.64125	1399	0.76181
1400	0.60325	140	0.68094	140	0.39388	1400	0.82631	1400	0.64113	1400	0.762
1401	0.60325	140.1	0.68088	140.1	0.394	1401	0.82625	1401	0.64106	1401	0.76225
1402	0.60325	140.2	0.68088	140.2	0.39406	1402	0.82619	1402	0.64094	1402	0.76263
1403	0.60325	140.3	0.68081	140.3	0.39431	1403	0.82613	1403	0.64088	1403	0.76294
1404	0.60325	140.4	0.68081	140.4	0.39456	1404	0.82606	1404	0.64081	1404	0.76313
1405	0.60325	140.5	0.68075	140.5	0.39481	1405	0.826	1405	0.64069	1405	0.76344
1406	0.60325	140.6	0.68075	140.6	0.39494	1406	0.826	1406	0.6405	1406	0.76381
1407	0.60325	140.7	0.68063	140.7	0.39506	1407	0.82594	1407	0.64038	1407	0.764
1408	0.60325	140.8	0.68063	140.8	0.39519	1408	0.82588	1408	0.64025	1408	0.76425
1409	0.60325	140.9	0.68063	140.9	0.3955	1409	0.82588	1409	0.64013	1409	0.76463
1410	0.60325	141	0.68056	141	0.39575	1410	0.82575	1410	0.64	1410	0.76488
1411	0.60331	141.1	0.68044	141.1	0.39588	1411	0.82569	1411	0.63994	1411	0.76506
1412	0.60331	141.2	0.68038	141.2	0.396	1412	0.82563	1412	0.63988	1412	0.76538
1413	0.60331	141.3	0.68038	141.3	0.39613	1413	0.82556	1413	0.63981	1413	0.76575
1414	0.60325	141.4	0.68038	141.4	0.39638	1414	0.82544	1414	0.63969	1414	0.76594
1415	0.60325	141.5	0.68025	141.5	0.39669	1415	0.82538	1415	0.6395	1415	0.766
1416	0.60325	141.6	0.68019	141.6	0.39681	1416	0.82531	1416	0.63938	1416	0.76619
1417	0.60325	141.7	0.68019	141.7	0.39694	1417	0.82519	1417	0.63925	1417	0.76656
1418	0.60325	141.8	0.68013	141.8	0.39706	1418	0.82513	1418	0.63913	1418	0.76688
1419	0.60325	141.9	0.68006	141.9	0.39725	1419	0.82506	1419	0.63906	1419	0.767
1420	0.60325	142	0.68006	142	0.3975	1420	0.82506	1420	0.63894	1420	0.76731
1421	0.60325	142.1	0.68006	142.1	0.39775	1421	0.825	1421	0.63888	1421	0.76769
1422	0.60325	142.2	0.68	142.2	0.39794	1422	0.82494	1422	0.63881	1422	0.76794
1423	0.60325	142.3	0.67994	142.3	0.398	1423	0.82494	1423	0.63869	1423	0.76813
1424	0.60325	142.4	0.67994	142.4	0.39806	1424	0.82488	1424	0.63863	1424	0.76844
1425	0.60325	142.5	0.67994	142.5	0.39831	1425	0.82481	1425	0.63844	1425	0.76875
1426	0.60325	142.6	0.67988	142.6	0.39856	1426	0.82475	1426	0.63831	1426	0.769
1427	0.60325	142.7	0.67988	142.7	0.39881	1427	0.82469	1427	0.63819	1427	0.76919
1428	0.60325	142.8	0.67988	142.8	0.39894	1428	0.82456	1428	0.63813	1428	0.7695
1429	0.60325	142.9	0.67981	142.9	0.399	1429	0.8245	1429	0.638	1429	0.76981
1430	0.60319	143	0.67975	143	0.39919	1430	0.82438	1430	0.63794	1430	0.77
1431	0.60319	143.1	0.67969	143.1	0.39944	1431	0.82431	1431	0.63788	1431	0.77025
1432	0.60325	143.2	0.67963	143.2	0.39969	1432	0.82425	1432	0.63781	1432	0.77063
1433	0.60325	143.3	0.67956	143.3	0.39994	1433	0.82419	1433	0.63775	1433	0.77088
1434	0.60325	143.4	0.67944	143.4	0.4	1434	0.82406	1434	0.63763	1434	0.77106
1435	0.60325	143.5	0.67944	143.5	0.40013	1435	0.82406	1435	0.6375	1435	0.77131
1436	0.60325	143.6	0.67931	143.6	0.40031	1436	0.824	1436	0.63731	1436	0.77169
1437	0.60325	143.7	0.67931	143.7	0.40063	1437	0.82394	1437	0.63725	1437	0.77194
1438	0.60325	143.8	0.67919	143.8	0.40088	1438	0.82394	1438	0.63713	1438	0.77206
1439	0.60325	143.9	0.67919	143.9	0.40094	1439	0.82388	1439	0.63706	1439	0.77238
1440	0.60325	144	0.67913	144	0.40106	1440	0.82381	1440	0.637	1440	0.77269
1441	0.60325	144.1	0.67913	144.1	0.40119	1441	0.82375	1441	0.63694	1441	0.77294
1442	0.60325	144.2	0.67906	144.2	0.4015	1442	0.82369	1442	0.63688	1442	0.77313
1443	0.60331	144.3	0.679	144.3	0.40169	1443	0.82363	1443	0.63675	1443	0.77344
1444	0.60331	144.4	0.67894	144.4	0.40188	1444	0.82356	1444	0.63663	1444	0.77375
1445	0.60331	144.5	0.67894	144.5	0.402	1445	0.82344	1445	0.6365	1445	0.77394
1446	0.60331	144.6	0.67888	144.6	0.40213	1446	0.82338	1446	0.63638	1446	0.77413
1447	0.60331	144.7	0.67888	144.7	0.40231	1447	0.82331	1447	0.63631	1447	0.77444
1448	0.60331	144.8	0.67881	144.8	0.40269	1448	0.82319	1448	0.63619	1448	0.77475
1449	0.60331	144.9	0.67875	144.9	0.40288	1449	0.82313	1449	0.63606	1449	0.77494
1450	0.60331	145	0.67869	145	0.40294	1450	0.82306	1450	0.636	1450	0.77513
1451	0.60331	145.1	0.67863	145.1	0.40306	1451	0.823	1451	0.63594	1451	0.77544
1452	0.60331	145.2	0.67856	145.2	0.40319	1452	0.823	1452	0.63588	1452	0.77581
1453	0.60331	145.3	0.67856	145.3	0.4035	1453	0.82294	1453	0.63581	1453	0.77594
1454	0.60325	145.4	0.67844	145.4	0.40375	1454	0.82294	1454	0.63569	1454	0.77619
1455	0.60331	145.5	0.67844	145.5	0.40388	1455	0.82288	1455	0.63563	1455	0.77644
1456	0.60325	145.6	0.67831	145.6	0.404	1456	0.82281	1456	0.63544	1456	0.77681
1457	0.60325	145.7	0.67831	145.7	0.40413	1457	0.82275	1457	0.63531	1457	0.777
1458	0.60331	145.8	0.67819	145.8	0.40431	1458	0.82269	1458	0.63525	1458	0.77713
1459	0.60325	145.9	0.67819	145.9	0.40463	1459	0.82256	1459	0.63513	1459	0.7775
1460	0.60325	146	0.67813	146	0.40481	1460	0.8225	1460	0.63506	1460	0.77781
1461	0.60325	146.1	0.67806	146.1	0.40494	1461	0.82244	1461	0.635	1461	0.77794
1462	0.60325	146.2	0.678	146.2	0.40506	1462	0.82231	1462	0.63494	1462	0.77813
1463	0.60325	146.3	0.678	146.3	0.40519	1463	0.82225	1463	0.63488	1463	0.77844
1464	0.60325	146.4	0.67794	146.4	0.4055	1464	0.82219	1464	0.63475	1464	0.77875
1465	0.60325	146.5	0.67788	146.5	0.40569	1465	0.82213	1465	0.63469	1465	0.77894
1466	0.60325	146.6	0.67788	146.6	0.40588	1466	0.82206	1466	0.63456	1466	0.77913
1467	0.60325	146.7	0.67781	146.7	0.406	1467	0.822	1467	0.63444	1467	0.77938
1468	0.60325	146.8	0.67775	146.8	0.40613	1468	0.822	1468	0.63431	1468	0.77975
1469	0.60325	146.9	0.67769	146.9	0.40625	1469	0.82194	1469	0.63419	1469	0.77994
1470	0.60325	147	0.67763	147	0.40663	1470	0.82194	1470	0.63413	1470	0.78006
1471	0.60325	147.1	0.6775	147.1	0.40681	1471	0.82188	1471	0.63406	1471	0.78031
1472	0.60325	147.2	0.6775	147.2	0.40694	1472	0.82181	1472	0.634	1472	0.78069
1473	0.60325	147.3	0.67738	147.3	0.407	1473	0.82175	1473	0.63394	1473	0.78088
1474	0.60331	147.4	0.67738	147.4	0.40713	1474	0.82169	1474	0.63388	1474	0.78106
1475	0.60325	147.5	0.67719	147.5	0.40744	1475	0.82156	1475	0.63381	1475	0.78125
1476	0.60325	147.6	0.67719	147.6	0.40763	1476	0.8215	1476	0.63369	1476	0.78163
1477	0.60325	147.7	0.67713	147.7	0.40781	1477	0.82144	1477	0.63356	1477	0.78188
1478	0.60331	147.8	0.67706	147.8	0.40794	1478	0.82131	1478	0.6335	1478	0.782
1479	0.60325	147.9	0.677	147.9	0.40806	1479	0.82125	1479	0.63338	1479	0.78213
1480	0.60325	148	0.677	148	0.40825	1480	0.82119	1480	0.63325	1480	0.78244
1481	0.60325	148.1	0.67694	148.1	0.4085	1481	0.82113	1481	0.63313	1481	0.78275
1482	0.60325	148.2	0.67694	148.2	0.40875	1482	0.82106	1482	0.63306	1482	0.78294
1483	0.60325	148.3	0.67688	148.3	0.40894	1483	0.821	1483	0.633	1483	0.78306
1484	0.60325	148.4	0.67681	148.4	0.409	1484	0.821	1484	0.63294	1484	0.78331
1485	0.60325	148.5	0.67675	148.5	0.40913	1485	0.82094	1485	0.63288	1485	0.78363
1486	0.60325	148.6	0.67669	148.6	0.40938	1486	0.82088	1486	0.63281	1486	0.78388
1487	0.60325	148.7	0.67656	148.7	0.40956	1487	0.82088	1487	0.63275	1487	0.784
1488	0.60325	148.8	0.67656	148.8	0.40988	1488	0.82081	1488	0.63263	1488	0.78419
1489	0.60325	148.9	0.67644	148.9	0.41	1489	0.82075	1489	0.6325	1489	0.7845
1490	0.60325	149	0.67638	149	0.41006	1490	0.82069	1490	0.63238	1490	0.78481
1491	0.60325	149.1	0.67625	149.1	0.41025	1491	0.82056	1491	0.63225	1491	0.78494
1492	0.60325	149.2	0.67619	149.2	0.4105	1492	0.8205	1492	0.63219	1492	0.78513
1493	0.60325	149.3	0.67613	149.3	0.41075	1493	0.82044	1493	0.63206	1493	0.78538
1494	0.60325	149.4	0.67606	149.4	0.41094	1494	0.82031	1494	0.632	1494	0.78569
1495	0.60325	149.5	0.676	149.5	0.41113	1495	0.82025	1495	0.63194	1495	0.78588
1496	0.60325	149.6	0.676	149.6	0.41144	1496	0.82019	1496	0.63188	1496	0.786
1497	0.60325	149.7	0.67594	149.7	0.41169	1497	0.82013	1497	0.63181	1497	0.78625
1498	0.60325	149.8	0.67588	149.8	0.41181	1498	0.82006	1498	0.63175	1498	0.7865
1499	0.60331	149.9	0.67581	149.9	0.41194	1499	0.82006	1499	0.63169	1499	0.78681
1500	0.60331	150	0.67569	150	0.412	1500	0.82	1500	0.63156	1500	0.78694
1501	0.60331	150.1	0.67563	150.1	0.41206	1501	0.81994	1501	0.63144	1501	0.78706
1502	0.60325	150.2	0.67556	150.2	0.41231	1502	0.81994	1502	0.63131	1502	0.78731
1503	0.60331	150.3	0.6755	150.3	0.41269	1503	0.81988	1503	0.63119	1503	0.78763
1504	0.60325	150.4	0.67538	150.4	0.41294	1504	0.81981	1504	0.63113	1504	0.78788
1505	0.60325	150.5	0.67531	150.5	0.41306	1505	0.81975	1505	0.63106	1505	0.788
1506	0.60331	150.6	0.67519	150.6	0.41325	1506	0.81975	1506	0.631	1506	0.78819
1507	0.60325	150.7	0.67519	150.7	0.41344	1507	0.81963	1507	0.63094	1507	0.78844
1508	0.60331	150.8	0.67506	150.8	0.41375	1508	0.81956	1508	0.63088	1508	0.78875
1509	0.60325	150.9	0.67506	150.9	0.41394	1509	0.8195	1509	0.63081	1509	0.78894
1510	0.60325	151	0.675	151	0.41394	1510	0.81938	1510	0.63069	1510	0.78906
1511	0.60325	151.1	0.67494	151.1	0.41406	1511	0.81931	1511	0.63063	1511	0.78925
1512	0.60331	151.2	0.67494	151.2	0.41431	1512	0.81925	1512	0.6305	1512	0.78956
1513	0.60331	151.3	0.67488	151.3	0.41456	1513	0.81919	1513	0.63038	1513	0.78981
1514	0.60325	151.4	0.67481	151.4	0.41481	1514	0.81913	1514	0.63025	1514	0.78994
1515	0.60331	151.5	0.67475	151.5	0.41488	1515	0.81906	1515	0.63019	1515	0.79013
1516	0.60325	151.6	0.67469	151.6	0.415	1516	0.81906	1516	0.63013	1516	0.79031
1517	0.60331	151.7	0.67456	151.7	0.41513	1517	0.819	1517	0.63006	1517	0.79063
1518	0.60331	151.8	0.67438	151.8	0.41538	1518	0.81894	1518	0.63	1518	0.79081
1519	0.60325	151.9	0.67438	151.9	0.41563	1519	0.81894	1519	0.62994	1519	0.791
1520	0.60325	152	0.67419	152	0.41581	1520	0.81888	1520	0.62988	1520	0.79113
1521	0.60331	152.1	0.67419	152.1	0.41594	1521	0.81888	1521	0.62981	1521	0.79138
1522	0.60325	152.2	0.67406	152.2	0.416	1522	0.81881	1522	0.62975	1522	0.79169
1523	0.60325	152.3	0.67406	152.3	0.41613	1523	0.81875	1523	0.62963	1523	0.79188
1524	0.60331	152.4	0.674	152.4	0.41638	1524	0.81869	1524	0.62956	1524	0.792
1525	0.60325	152.5	0.67394	152.5	0.41663	1525	0.81863	1525	0.62944	1525	0.79213
1526	0.60325	152.6	0.67388	152.6	0.41688	1526	0.81856	1526	0.62931	1526	0.79244
1527	0.60325	152.7	0.67381	152.7	0.41694	1527	0.81844	1527	0.62925	1527	0.79269
1528	0.60325	152.8	0.67375	152.8	0.41706	1528	0.81838	1528	0.62913	1528	0.79288
1529	0.60325	152.9	0.67369	152.9	0.41719	1529	0.81831	1529	0.62906	1529	0.793
1530	0.60331	153	0.67356	153	0.41744	1530	0.81825	1530	0.629	1530	0.79319
1531	0.60331	153.1	0.67338	153.1	0.41769	1531	0.81819	1531	0.62894	1531	0.79344
1532	0.60325	153.2	0.67338	153.2	0.41781	1532	0.81813	1532	0.62888	1532	0.79369
1533	0.60331	153.3	0.67325	153.3	0.41794	1533	0.81806	1533	0.62881	1533	0.79388
1534	0.60325	153.4	0.67319	153.4	0.418	1534	0.81806	1534	0.62875	1534	0.794
1535	0.60331	153.5	0.67306	153.5	0.41819	1535	0.818	1535	0.62869	1535	0.79413
1536	0.60325	153.6	0.67306	153.6	0.41844	1536	0.818	1536	0.62856	1536	0.79438
1537	0.60325	153.7	0.67294	153.7	0.41869	1537	0.81794	1537	0.6285	1537	0.79469
1538	0.60331	153.8	0.67294	153.8	0.41888	1538	0.81794	1538	0.62838	1538	0.79488
1539	0.60331	153.9	0.67288	153.9	0.41894	1539	0.81788	1539	0.62825	1539	0.795
1540	0.60325	154	0.67281	154	0.41906	1540	0.81781	1540	0.62819	1540	0.79513
1541	0.60325	154.1	0.67269	154.1	0.41925	1541	0.81781	1541	0.62813	1541	0.79538
1542	0.60325	154.2	0.67256	154.2	0.4195	1542	0.81775	1542	0.62806	1542	0.79563
1543	0.60325	154.3	0.67256	154.3	0.41975	1543	0.81769	1543	0.628	1543	0.79581
1544	0.60369	154.4	0.67238	154.4	0.41988	1544	0.81763	1544	0.62794	1544	0.79594
1545	0.60381	154.5	0.67231	154.5	0.42	1545	0.81756	1545	0.62788	1545	0.79606
1546	0.60394	154.6	0.67219	154.6	0.42006	1546	0.81744	1546	0.62781	1546	0.79625
1547	0.60375	154.7	0.67213	154.7	0.42025	1547	0.81738	1547	0.62775	1547	0.79656
1548	0.606	154.8	0.672	154.8	0.4205	1548	0.81731	1548	0.62763	1548	0.79675
1549	0.60581	154.9	0.672	154.9	0.42075	1549	0.81725	1549	0.62756	1549	0.79694
1550	0.60575	155	0.67194	155	0.42088	1550	0.81719	1550	0.62744	1550	0.79706
1551	0.60581	155.1	0.67188	155.1	0.421	1551	0.81713	1551	0.62731	1551	0.79719
1552	0.60563	155.2	0.67181	155.2	0.42113	1552	0.81706	1552	0.62725	1552	0.79744
1553	0.60575	155.3	0.67175	155.3	0.42131	1553	0.81706	1553	0.62719	1553	0.79769
1554	0.60556	155.4	0.67163	155.4	0.42156	1554	0.817	1554	0.62713	1554	0.79788
1555	0.60544	155.5	0.6715	155.5	0.42181	1555	0.817	1555	0.62706	1555	0.798
1556	0.60544	155.6	0.6715	155.6	0.42188	1556	0.81694	1556	0.627	1556	0.79813
1557	0.60531	155.7	0.67131	155.7	0.422	1557	0.81694	1557	0.62694	1557	0.79831
1558	0.60519	155.8	0.67125	155.8	0.42213	1558	0.81688	1558	0.62688	1558	0.79856
1559	0.60513	155.9	0.67113	155.9	0.42231	1559	0.81681	1559	0.62681	1559	0.79881
1560	0.60506	156	0.67106	156	0.42263	1560	0.81681	1560	0.62675	1560	0.79894
1561	0.60494	156.1	0.671	156.1	0.42275	1561	0.81675	1561	0.62669	1561	0.79906
1562	0.60488	156.2	0.67094	156.2	0.42294	1562	0.81669	1562	0.62656	1562	0.79919
1563	0.60475	156.3	0.67094	156.3	0.423	1563	0.81663	1563	0.6265	1563	0.79944
1564	0.60481	156.4	0.67088	156.4	0.42313	1564	0.81656	1564	0.62638	1564	0.79969
1565	0.60481	156.5	0.67075	156.5	0.42331	1565	0.8165	1565	0.62631	1565	0.79981
1566	0.60488	156.6	0.67069	156.6	0.42356	1566	0.81644	1566	0.62619	1566	0.8
1567	0.605	156.7	0.67056	156.7	0.42375	1567	0.81638	1567	0.62613	1567	0.80006
1568	0.60488	156.8	0.67038	156.8	0.42394	1568	0.81631	1568	0.62606	1568	0.80025
1569	0.60475	156.9	0.67031	156.9	0.424	1569	0.81625	1569	0.626	1569	0.8005
1570	0.60475	157	0.67019	157	0.42413	1570	0.81619	1570	0.626	1570	0.80075
1571	0.60463	157.1	0.67013	157.1	0.42431	1571	0.81613	1571	0.62594	1571	0.80088
1572	0.60475	157.2	0.67	157.2	0.42456	1572	0.81606	1572	0.62588	1572	0.801
1573	0.60475	157.3	0.67	157.3	0.42475	1573	0.81606	1573	0.62581	1573	0.80113
1574	0.60481	157.4	0.66994	157.4	0.42494	1574	0.816	1574	0.62575	1574	0.80131
1575	0.60469	157.5	0.66981	157.5	0.425	1575	0.816	1575	0.62569	1575	0.80156
1576	0.60488	157.6	0.66975	157.6	0.42513	1576	0.81594	1576	0.62563	1576	0.80175
1577	0.60488	157.7	0.66963	157.7	0.42531	1577	0.81594	1577	0.6255	1577	0.80194
1578	0.60469	157.8	0.66956	157.8	0.42556	1578	0.81588	1578	0.62538	1578	0.802
1579	0.60463	157.9	0.6695	157.9	0.42575	1579	0.81588	1579	0.62531	1579	0.80213
1580	0.6045	158	0.66931	158	0.42594	1580	0.81581	1580	0.62525	1580	0.80231
1581	0.60463	158.1	0.66925	158.1	0.426	1581	0.81575	1581	0.62519	1581	0.80256
1582	0.6045	158.2	0.66913	158.2	0.42613	1582	0.81569	1582	0.62506	1582	0.80275
1583	0.60438	158.3	0.66906	158.3	0.42631	1583	0.81569	1583	0.62506	1583	0.80294
1584	0.60438	158.4	0.669	158.4	0.42663	1584	0.81556	1584	0.625	1584	0.803
1585	0.6045	158.5	0.66894	158.5	0.42681	1585	0.8155	1585	0.62494	1585	0.80313
1586	0.60456	158.6	0.66894	158.6	0.42694	1586	0.81544	1586	0.62488	1586	0.80331
1587	0.60438	158.7	0.66881	158.7	0.427	1587	0.81538	1587	0.62481	1587	0.80356
1588	0.60444	158.8	0.66875	158.8	0.42713	1588	0.81531	1588	0.62475	1588	0.80375
1589	0.60488	158.9	0.66863	158.9	0.42731	1589	0.81531	1589	0.62469	1589	0.80388
1590	0.60444	159	0.6685	159	0.42756	1590	0.81525	1590	0.62456	1590	0.804
1591	0.60438	159.1	0.66831	159.1	0.42781	1591	0.81519	1591	0.6245	1591	0.80413
1592	0.60444	159.2	0.66825	159.2	0.42794	1592	0.81513	1592	0.62444	1592	0.80425
1593	0.60456	159.3	0.66813	159.3	0.428	1593	0.81506	1593	0.62431	1593	0.8045
1594	0.60463	159.4	0.66806	159.4	0.42806	1594	0.81506	1594	0.62425	1594	0.80469
1595	0.60488	159.5	0.668	159.5	0.42831	1595	0.815	1595	0.62413	1595	0.80488
1596	0.60519	159.6	0.66794	159.6	0.4285	1596	0.815	1596	0.62406	1596	0.80494
1597	0.60544	159.7	0.66794	159.7	0.42881	1597	0.81494	1597	0.62406	1597	0.80506
1598	0.60563	159.8	0.66781	159.8	0.42894	1598	0.81494	1598	0.624	1598	0.80519
1599	0.60581	159.9	0.66775	159.9	0.429	1599	0.81494	1599	0.62394	1599	0.80538
1600	0.60594	160	0.66763	160	0.42913	1600	0.81488	1600	0.62388	1600	0.80563
1601	0.60625	160.1	0.6675	160.1	0.42931	1601	0.81481	1601	0.62388	1601	0.80581
1602	0.60631	160.2	0.66731	160.2	0.4295	1602	0.81481	1602	0.62381	1602	0.80594
1603	0.60619	160.3	0.66725	160.3	0.42975	1603	0.81475	1603	0.62375	1603	0.806
1604	0.60631	160.4	0.66713	160.4	0.42988	1604	0.81469	1604	0.62363	1604	0.80613
1605	0.60613	160.5	0.66706	160.5	0.43	1605	0.81463	1605	0.62356	1605	0.80625
1606	0.606	160.6	0.667	160.6	0.43006	1606	0.81456	1606	0.6235	1606	0.8065
1607	0.60594	160.7	0.66694	160.7	0.43019	1607	0.8145	1607	0.62338	1607	0.80669
1608	0.60563	160.8	0.66688	160.8	0.43044	1608	0.81444	1608	0.62331	1608	0.80681
1609	0.60531	160.9	0.66681	160.9	0.43069	1609	0.81438	1609	0.62325	1609	0.80694
1610	0.60513	161	0.66669	161	0.43088	1610	0.81431	1610	0.62319	1610	0.80706
1611	0.60513	161.1	0.66656	161.1	0.43094	1611	0.81425	1611	0.62313	1611	0.80713
1612	0.605	161.2	0.66644	161.2	0.43106	1612	0.81419	1612	0.62306	1612	0.80731
1613	0.60494	161.3	0.66625	161.3	0.43119	1613	0.81413	1613	0.623	1613	0.80756
1614	0.605	161.4	0.66619	161.4	0.43138	1614	0.81413	1614	0.623	1614	0.80775
1615	0.60481	161.5	0.66613	161.5	0.43169	1615	0.81406	1615	0.62294	1615	0.80788
1616	0.60494	161.6	0.666	161.6	0.43181	1616	0.81406	1616	0.62288	1616	0.80794
1617	0.60488	161.7	0.66594	161.7	0.43194	1617	0.814	1617	0.62288	1617	0.80806
1618	0.60488	161.8	0.66594	161.8	0.43206	1618	0.814	1618	0.62281	1618	0.80819
1619	0.605	161.9	0.66588	161.9	0.43219	1619	0.81394	1619	0.62275	1619	0.80831
1620	0.60488	162	0.66575	162	0.43238	1620	0.81394	1620	0.62269	1620	0.80856
1621	0.60488	162.1	0.66563	162.1	0.43263	1621	0.81388	1621	0.62263	1621	0.80875
1622	0.60481	162.2	0.66556	162.2	0.43281	1622	0.81388	1622	0.6225	1622	0.80888
1623	0.60469	162.3	0.66538	162.3	0.43294	1623	0.81388	1623	0.62244	1623	0.80894
1624	0.60481	162.4	0.66525	162.4	0.433	1624	0.81381	1624	0.62238	1624	0.80906
1625	0.60481	162.5	0.66513	162.5	0.43313	1625	0.81375	1625	0.62225	1625	0.80913
1626	0.60463	162.6	0.66506	162.6	0.43331	1626	0.81369	1626	0.62219	1626	0.80931
1627	0.60463	162.7	0.665	162.7	0.43356	1627	0.81363	1627	0.62213	1627	0.8095
1628	0.60475	162.8	0.66494	162.8	0.43375	1628	0.81356	1628	0.62206	1628	0.80969
1629	0.60494	162.9	0.66488	162.9	0.43394	1629	0.81356	1629	0.62206	1629	0.80981
1630	0.60519	163	0.66475	163	0.434	1630	0.81344	1630	0.622	1630	0.80994
1631	0.60525	163.1	0.66469	163.1	0.43406	1631	0.81344	1631	0.62194	1631	0.81
1632	0.6055	163.2	0.6645	163.2	0.43431	1632	0.81338	1632	0.62194	1632	0.81013
1633	0.60563	163.3	0.66438	163.3	0.4345	1633	0.81331	1633	0.62188	1633	0.81025
1634	0.606	163.4	0.66425	163.4	0.43475	1634	0.81325	1634	0.62188	1634	0.81044
1635	0.60606	163.5	0.66413	163.5	0.43494	1635	0.81319	1635	0.62181	1635	0.81063
1636	0.60613	163.6	0.66406	163.6	0.435	1636	0.81313	1636	0.62175	1636	0.81075
1637	0.60631	163.7	0.664	163.7	0.43506	1637	0.81306	1637	0.62169	1637	0.81088
1638	0.60619	163.8	0.66394	163.8	0.43525	1638	0.81306	1638	0.62163	1638	0.81094
1639	0.60638	163.9	0.66394	163.9	0.4355	1639	0.813	1639	0.62156	1639	0.81106
1640	0.60619	164	0.66375	164	0.43569	1640	0.813	1640	0.62144	1640	0.81113
1641	0.60631	164.1	0.66375	164.1	0.43588	1641	0.81294	1641	0.62138	1641	0.81131
1642	0.60613	164.2	0.66356	164.2	0.43594	1642	0.81294	1642	0.62131	1642	0.8115
1643	0.60613	164.3	0.66344	164.3	0.43606	1643	0.81294	1643	0.62125	1643	0.81163
1644	0.60594	164.4	0.66325	164.4	0.43625	1644	0.81288	1644	0.62119	1644	0.81181
1645	0.60575	164.5	0.66319	164.5	0.4365	1645	0.81288	1645	0.62113	1645	0.81188
1646	0.60544	164.6	0.66306	164.6	0.43669	1646	0.81281	1646	0.62106	1646	0.812
1647	0.60538	164.7	0.663	164.7	0.43681	1647	0.81275	1647	0.621	1647	0.81206
1648	0.60513	164.8	0.66294	164.8	0.437	1648	0.81269	1648	0.621	1648	0.81219
1649	0.60519	164.9	0.66294	164.9	0.43706	1649	0.81269	1649	0.62094	1649	0.81231
1650	0.60481	165	0.66281	165	0.43719	1650	0.81256	1650	0.62088	1650	0.8125
1651	0.60519	165.1	0.66275	165.1	0.43744	1651	0.81256	1651	0.62088	1651	0.81269
1652	0.60519	165.2	0.66256	165.2	0.43769	1652	0.81244	1652	0.62081	1652	0.81281
1653	0.60513	165.3	0.66244	165.3	0.43781	1653	0.81244	1653	0.62075	1653	0.81288
1654	0.60525	165.4	0.66231	165.4	0.43794	1654	0.81231	1654	0.62069	1654	0.81294
1655	0.605	165.5	0.66219	165.5	0.438	1655	0.81231	1655	0.62063	1655	0.81306
1656	0.60525	165.6	0.66206	165.6	0.43813	1656	0.81225	1656	0.62056	1656	0.81313
1657	0.60513	165.7	0.662	165.7	0.43831	1657	0.81219	1657	0.6205	1657	0.81325
1658	0.60513	165.8	0.66194	165.8	0.4385	1658	0.81213	1658	0.62044	1658	0.81344
1659	0.60494	165.9	0.66194	165.9	0.43875	1659	0.81206	1659	0.62031	1659	0.81363
1660	0.60494	166	0.66181	166	0.43888	1660	0.81206	1660	0.62025	1660	0.81375
1661	0.60494	166.1	0.66175	166.1	0.439	1661	0.812	1661	0.62019	1661	0.81388
1662	0.605	166.2	0.66156	166.2	0.43906	1662	0.812	1662	0.62013	1662	0.81394
1663	0.60488	166.3	0.66144	166.3	0.43925	1663	0.812	1663	0.62013	1663	0.814
1664	0.60481	166.4	0.66131	166.4	0.43944	1664	0.81194	1664	0.62006	1664	0.81406
1665	0.605	166.5	0.66119	166.5	0.43969	1665	0.81194	1665	0.62	1665	0.81413
1666	0.60506	166.6	0.66113	166.6	0.43988	1666	0.81188	1666	0.62	1666	0.81425
1667	0.6055	166.7	0.661	166.7	0.43994	1667	0.81188	1667	0.61994	1667	0.81444
1668	0.60606	166.8	0.66094	166.8	0.44006	1668	0.81181	1668	0.61994	1668	0.81463
1669	0.60619	166.9	0.66094	166.9	0.44019	1669	0.81175	1669	0.61988	1669	0.81475
1670	0.60638	167	0.66081	167	0.44044	1670	0.81175	1670	0.61981	1670	0.81488
1671	0.6065	167.1	0.66075	167.1	0.44069	1671	0.81169	1671	0.61975	1671	0.81494
1672	0.60669	167.2	0.66056	167.2	0.44081	1672	0.81163	1672	0.61975	1672	0.815
1673	0.6065	167.3	0.66044	167.3	0.44094	1673	0.81156	1673	0.61969	1673	0.81506
1674	0.60644	167.4	0.66031	167.4	0.441	1674	0.8115	1674	0.61963	1674	0.81513
1675	0.60625	167.5	0.66019	167.5	0.44113	1675	0.81144	1675	0.61956	1675	0.81531
1676	0.606	167.6	0.66006	167.6	0.44131	1676	0.81138	1676	0.61944	1676	0.81544
1677	0.60563	167.7	0.66	167.7	0.44156	1677	0.81131	1677	0.61938	1677	0.81563
1678	0.60544	167.8	0.65994	167.8	0.44175	1678	0.81125	1678	0.61931	1678	0.81575
1679	0.60525	167.9	0.65994	167.9	0.44194	1679	0.81119	1679	0.61925	1679	0.81588
1680	0.60519	168	0.65981	168	0.442	1680	0.81119	1680	0.61919	1680	0.81594
1681	0.60513	168.1	0.65975	168.1	0.44206	1681	0.81113	1681	0.61913	1681	0.816
1682	0.60506	168.2	0.65956	168.2	0.44225	1682	0.81106	1682	0.61906	1682	0.81606
1683	0.60519	168.3	0.65944	168.3	0.4425	1683	0.81106	1683	0.61906	1683	0.81613
1684	0.60513	168.4	0.65925	168.4	0.44269	1684	0.811	1684	0.619	1684	0.81625
1685	0.60494	168.5	0.65913	168.5	0.44288	1685	0.811	1685	0.61894	1685	0.81638
1686	0.605	168.6	0.65906	168.6	0.44294	1686	0.81094	1686	0.61894	1686	0.81656
1687	0.60481	168.7	0.659	168.7	0.443	1687	0.81094	1687	0.61888	1687	0.81669
1688	0.60469	168.8	0.65894	168.8	0.44319	1688	0.81088	1688	0.61881	1688	0.81681
1689	0.60475	168.9	0.65888	168.9	0.44338	1689	0.81088	1689	0.61881	1689	0.81688
1690	0.60481	169	0.65875	169	0.44369	1690	0.81088	1690	0.61875	1690	0.81694
1691	0.60513	169.1	0.65875	169.1	0.44381	1691	0.81081	1691	0.61869	1691	0.817
1692	0.60556	169.2	0.6585	169.2	0.44394	1692	0.81075	1692	0.61863	1692	0.81706
1693	0.60594	169.3	0.65838	169.3	0.444	1693	0.81075	1693	0.61856	1693	0.81719
1694	0.60619	169.4	0.65825	169.4	0.44413	1694	0.81069	1694	0.61844	1694	0.81725
1695	0.60644	169.5	0.65813	169.5	0.44431	1695	0.81063	1695	0.61838	1695	0.81744
1696	0.60656	169.6	0.65806	169.6	0.4445	1696	0.81056	1696	0.61831	1696	0.81756
1697	0.60638	169.7	0.658	169.7	0.44475	1697	0.8105	1697	0.61825	1697	0.81769
1698	0.60619	169.8	0.65794	169.8	0.44488	1698	0.81044	1698	0.61819	1698	0.81781
1699	0.60594	169.9	0.65788	169.9	0.445	1699	0.81044	1699	0.61813	1699	0.81788
1700	0.60556	170	0.65775	170	0.44506	1700	0.81031	1700	0.61806	1700	0.81794
1701	0.60525	170.1	0.65769	170.1	0.44519	1701	0.81031	1701	0.61806	1701	0.818
1702	0.60506	170.2	0.65744	170.2	0.44538	1702	0.81025	1702	0.618	1702	0.81806
1703	0.60513	170.3	0.65731	170.3	0.44569	1703	0.81019	1703	0.61794	1703	0.81813
1704	0.60519	170.4	0.65719	170.4	0.44581	1704	0.81013	1704	0.61794	1704	0.81825
1705	0.60513	170.5	0.65706	170.5	0.44594	1705	0.81013	1705	0.61788	1705	0.81838
1706	0.605	170.6	0.657	170.6	0.446	1706	0.81006	1706	0.61788	1706	0.8185
1707	0.60488	170.7	0.65694	170.7	0.44606	1707	0.81006	1707	0.61781	1707	0.81863
1708	0.60469	170.8	0.65688	170.8	0.44631	1708	0.81	1708	0.61775	1708	0.81875
1709	0.60469	170.9	0.65681	170.9	0.44644	1709	0.81	1709	0.61769	1709	0.81881
1710	0.60463	171	0.65675	171	0.44675	1710	0.81	1710	0.61763	1710	0.81888
1711	0.60481	171.1	0.6565	171.1	0.44688	1711	0.80994	1711	0.61756	1711	0.81894
1712	0.60513	171.2	0.65638	171.2	0.44694	1712	0.80994	1712	0.6175	1712	0.819
1713	0.60569	171.3	0.65625	171.3	0.44706	1713	0.80988	1713	0.61744	1713	0.81906
1714	0.60613	171.4	0.65613	171.4	0.44713	1714	0.80988	1714	0.61738	1714	0.81913
1715	0.60625	171.5	0.65606	171.5	0.44744	1715	0.80981	1715	0.61731	1715	0.81919
1716	0.60638	171.6	0.65594	171.6	0.44756	1716	0.80981	1716	0.61725	1716	0.81931
1717	0.60656	171.7	0.65594	171.7	0.44781	1717	0.80975	1717	0.61719	1717	0.81944
1718	0.60638	171.8	0.65581	171.8	0.44794	1718	0.80975	1718	0.61713	1718	0.81956
1719	0.60625	171.9	0.65575	171.9	0.448	1719	0.80969	1719	0.61706	1719	0.81969
1720	0.60588	172	0.65556	172	0.44813	1720	0.80963	1720	0.61706	1720	0.81975
1721	0.60544	172.1	0.6555	172.1	0.44831	1721	0.80963	1721	0.617	1721	0.81988
1722	0.60519	172.2	0.65531	172.2	0.44856	1722	0.80956	1722	0.617	1722	0.81994
1723	0.60513	172.3	0.65519	172.3	0.44875	1723	0.8095	1723	0.61694	1723	0.82
1724	0.60513	172.4	0.65506	172.4	0.44881	1724	0.80944	1724	0.61694	1724	0.82
1725	0.60519	172.5	0.655	172.5	0.449	1725	0.80938	1725	0.61688	1725	0.82006
1726	0.60513	172.6	0.65494	172.6	0.44906	1726	0.80938	1726	0.61681	1726	0.82013
1727	0.60513	172.7	0.65488	172.7	0.44919	1727	0.80931	1727	0.61681	1727	0.82025
1728	0.60506	172.8	0.65475	172.8	0.44944	1728	0.80925	1728	0.61675	1728	0.82038
1729	0.60506	172.9	0.65463	172.9	0.44963	1729	0.80919	1729	0.61669	1729	0.82044
1730	0.60488	173	0.6545	173	0.44981	1730	0.80913	1730	0.61663	1730	0.82056
1731	0.605	173.1	0.65438	173.1	0.44994	1731	0.80913	1731	0.61656	1731	0.82069
1732	0.60531	173.2	0.65419	173.2	0.45	1732	0.80906	1732	0.6165	1732	0.82075
1733	0.60575	173.3	0.65413	173.3	0.45006	1733	0.80906	1733	0.61644	1733	0.82088
1734	0.60594	173.4	0.654	173.4	0.45025	1734	0.80906	1734	0.61638	1734	0.82094
1735	0.60644	173.5	0.654	173.5	0.45044	1735	0.809	1735	0.61631	1735	0.82094
1736	0.6065	173.6	0.65394	173.6	0.45069	1736	0.809	1736	0.61625	1736	0.821
1737	0.60656	173.7	0.65388	173.7	0.45088	1737	0.80894	1737	0.61625	1737	0.82106
1738	0.60656	173.8	0.65375	173.8	0.45094	1738	0.80894	1738	0.61619	1738	0.82113
1739	0.60663	173.9	0.65363	173.9	0.45106	1739	0.80894	1739	0.61613	1739	0.82119
1740	0.60631	174	0.65344	174	0.45119	1740	0.80888	1740	0.61606	1740	0.82125
1741	0.60594	174.1	0.65338	174.1	0.45138	1741	0.80888	1741	0.61606	1741	0.82138
1742	0.60556	174.2	0.65319	174.2	0.45163	1742	0.80881	1742	0.616	1742	0.8215
1743	0.60544	174.3	0.65313	174.3	0.45175	1743	0.80881	1743	0.616	1743	0.82163
1744	0.60544	174.4	0.653	174.4	0.45194	1744	0.80875	1744	0.61594	1744	0.82169
1745	0.60538	174.5	0.653	174.5	0.452	1745	0.80875	1745	0.61594	1745	0.82175
1746	0.60525	174.6	0.65288	174.6	0.45206	1746	0.80869	1746	0.61588	1746	0.82188
1747	0.60525	174.7	0.65275	174.7	0.45219	1747	0.80863	1747	0.61588	1747	0.82188
1748	0.60525	174.8	0.65269	174.8	0.45244	1748	0.80856	1748	0.61581	1748	0.82194
1749	0.605	174.9	0.6525	174.9	0.45263	1749	0.80856	1749	0.61575	1749	0.822
1750	0.60513	175	0.65244	175	0.45281	1750	0.8085	1750	0.61575	1750	0.822
1751	0.605	175.1	0.65225	175.1	0.45294	1751	0.80844	1751	0.61569	1751	0.82206
1752	0.60475	175.2	0.65213	175.2	0.453	1752	0.80838	1752	0.61563	1752	0.82213
1753	0.60494	175.3	0.65206	175.3	0.45319	1753	0.80838	1753	0.61556	1753	0.82219
1754	0.60519	175.4	0.652	175.4	0.45331	1754	0.80831	1754	0.6155	1754	0.82231
1755	0.60575	175.5	0.65188	175.5	0.45356	1755	0.80825	1755	0.61544	1755	0.82238
1756	0.606	175.6	0.65181	175.6	0.45375	1756	0.80819	1756	0.61538	1756	0.8225
1757	0.60644	175.7	0.65169	175.7	0.45388	1757	0.80819	1757	0.61531	1757	0.82256
1758	0.60625	175.8	0.65156	175.8	0.454	1758	0.80813	1758	0.61525	1758	0.82263
1759	0.60619	175.9	0.65144	175.9	0.45406	1759	0.80813	1759	0.61519	1759	0.82275
1760	0.6065	176	0.65125	176	0.45419	1760	0.80806	1760	0.61519	1760	0.82281
1761	0.60644	176.1	0.65119	176.1	0.45444	1761	0.80806	1761	0.61513	1761	0.82288
1762	0.60625	176.2	0.65106	176.2	0.45463	1762	0.808	1762	0.61513	1762	0.82294
1763	0.60625	176.3	0.651	176.3	0.45475	1763	0.808	1763	0.61506	1763	0.82294
1764	0.60581	176.4	0.65094	176.4	0.45494	1764	0.80794	1764	0.615	1764	0.823
1765	0.60569	176.5	0.65081	176.5	0.455	1765	0.80794	1765	0.615	1765	0.823
1766	0.60544	176.6	0.65075	176.6	0.45506	1766	0.80794	1766	0.61494	1766	0.82306
1767	0.60519	176.7	0.65063	176.7	0.45519	1767	0.80788	1767	0.61494	1767	0.82313
1768	0.60525	176.8	0.65044	176.8	0.45538	1768	0.80788	1768	0.61488	1768	0.82319
1769	0.60469	176.9	0.65038	176.9	0.45563	1769	0.80781	1769	0.61488	1769	0.82325
1770	0.60488	177	0.65019	177	0.45588	1770	0.80781	1770	0.61488	1770	0.82331
1771	0.605	177.1	0.65013	177.1	0.45594	1771	0.80781	1771	0.61481	1771	0.82344
1772	0.60488	177.2	0.65	177.2	0.456	1772	0.80775	1772	0.61475	1772	0.8235
1773	0.60494	177.3	0.64994	177.3	0.45613	1773	0.80769	1773	0.61475	1773	0.82363
1774	0.60475	177.4	0.64988	177.4	0.45631	1774	0.80763	1774	0.61469	1774	0.82369
1775	0.60475	177.5	0.64981	177.5	0.4565	1775	0.80763	1775	0.61463	1775	0.82375
1776	0.60494	177.6	0.64963	177.6	0.45675	1776	0.80756	1776	0.61456	1776	0.82381
1777	0.60494	177.7	0.64956	177.7	0.45688	1777	0.8075	1777	0.61456	1777	0.82388
1778	0.60494	177.8	0.64938	177.8	0.45694	1778	0.8075	1778	0.6145	1778	0.82394
1779	0.60475	177.9	0.64925	177.9	0.457	1779	0.80744	1779	0.61444	1779	0.82394
1780	0.60469	178	0.64913	178	0.45713	1780	0.80738	1780	0.61438	1780	0.824
1781	0.60469	178.1	0.64906	178.1	0.45731	1781	0.80731	1781	0.61438	1781	0.824
1782	0.605	178.2	0.649	178.2	0.45756	1782	0.80725	1782	0.61431	1782	0.82406
1783	0.60538	178.3	0.64894	178.3	0.45775	1783	0.80725	1783	0.61425	1783	0.82406
1784	0.60563	178.4	0.64875	178.4	0.45788	1784	0.80719	1784	0.61419	1784	0.82413
1785	0.60606	178.5	0.64875	178.5	0.458	1785	0.80719	1785	0.61419	1785	0.82419
1786	0.606	178.6	0.6485	178.6	0.45806	1786	0.80713	1786	0.61413	1786	0.82425
1787	0.60619	178.7	0.64838	178.7	0.45819	1787	0.80713	1787	0.61406	1787	0.82431
1788	0.6065	178.8	0.64825	178.8	0.45844	1788	0.80706	1788	0.61406	1788	0.82438
1789	0.6065	178.9	0.64813	178.9	0.45863	1789	0.80706	1789	0.61406	1789	0.8245
1790	0.60631	179	0.648	179	0.45875	1790	0.807	1790	0.614	1790	0.82456
1791	0.60638	179.1	0.64794	179.1	0.45888	1791	0.807	1791	0.614	1791	0.82463
1792	0.60613	179.2	0.64794	179.2	0.459	1792	0.807	1792	0.61394	1792	0.82469
1793	0.60575	179.3	0.64781	179.3	0.45906	1793	0.80694	1793	0.61394	1793	0.82475
1794	0.60563	179.4	0.64775	179.4	0.45919	1794	0.80694	1794	0.61388	1794	0.82481
1795	0.6055	179.5	0.64756	179.5	0.4595	1795	0.80694	1795	0.61388	1795	0.82488
1796	0.60531	179.6	0.64738	179.6	0.45963	1796	0.80688	1796	0.61381	1796	0.82488
1797	0.60519	179.7	0.64725	179.7	0.45981	1797	0.80688	1797	0.61381	1797	0.82494
1798	0.60506	179.8	0.64713	179.8	0.45994	1798	0.80688	1798	0.61375	1798	0.82494
1799	0.605	179.9	0.64706	179.9	0.46	1799	0.80681	1799	0.61369	1799	0.825
1800	0.60488	180	0.647	180	0.46013	1800	0.80681	1800	0.61369	1800	0.825
1801	0.60481	180.1	0.64694	180.1	0.46025	1801	0.80681	1801	0.61363	1801	0.82506
1802	0.60481	180.2	0.64688	180.2	0.46056	1802	0.80675	1802	0.61356	1802	0.82506
1803	0.60463	180.3	0.64669	180.3	0.46069	1803	0.80669	1803	0.6135	1803	0.82513
1804	0.60463	180.4	0.64663	180.4	0.46081	1804	0.80669	1804	0.61344	1804	0.82519
1805	0.60475	180.5	0.64644	180.5	0.46094	1805	0.80663	1805	0.61338	1805	0.82519
1806	0.60513	180.6	0.64625	180.6	0.461	1806	0.80656	1806	0.61331	1806	0.82525
1807	0.60556	180.7	0.64613	180.7	0.46119	1807	0.80656	1807	0.61325	1807	0.82531
1808	0.60619	180.8	0.64606	180.8	0.46131	1808	0.8065	1808	0.61319	1808	0.82544
1809	0.60631	180.9	0.646	180.9	0.46156	1809	0.80644	1809	0.61319	1809	0.82544
1810	0.6065	181	0.64594	181	0.46175	1810	0.80638	1810	0.61313	1810	0.8255
1811	0.60656	181.1	0.64588	181.1	0.46188	1811	0.80638	1811	0.61306	1811	0.82563
1812	0.6065	181.2	0.64575	181.2	0.46194	1812	0.80631	1812	0.61306	1812	0.82563
1813	0.606	181.3	0.64569	181.3	0.462	1813	0.80625	1813	0.613	1813	0.82569
1814	0.6055	181.4	0.6455	181.4	0.46213	1814	0.80625	1814	0.613	1814	0.82575
1815	0.605	181.5	0.64531	181.5	0.46225	1815	0.80619	1815	0.61294	1815	0.82581
1816	0.60506	181.6	0.64519	181.6	0.46256	1816	0.80613	1816	0.61294	1816	0.82581
1817	0.60506	181.7	0.64506	181.7	0.46269	1817	0.80613	1817	0.61288	1817	0.82588
1818	0.60506	181.8	0.645	181.8	0.46288	1818	0.80606	1818	0.61288	1818	0.82588
1819	0.605	181.9	0.64494	181.9	0.46294	1819	0.80606	1819	0.61281	1819	0.82594
1820	0.60488	182	0.64494	182	0.463	1820	0.80606	1820	0.61281	1820	0.82594
1821	0.60481	182.1	0.64475	182.1	0.46319	1821	0.806	1821	0.61281	1821	0.826
1822	0.60488	182.2	0.64475	182.2	0.46331	1822	0.806	1822	0.61275	1822	0.826
1823	0.60475	182.3	0.6445	182.3	0.46356	1823	0.806	1823	0.61269	1823	0.826
1824	0.60463	182.4	0.64431	182.4	0.46369	1824	0.80594	1824	0.61269	1824	0.82606
1825	0.60488	182.5	0.64425	182.5	0.46388	1825	0.80594	1825	0.61263	1825	0.82606
1826	0.60519	182.6	0.64413	182.6	0.46394	1826	0.80594	1826	0.61256	1826	0.82613
1827	0.6055	182.7	0.644	182.7	0.464	1827	0.80594	1827	0.6125	1827	0.82613
1828	0.60588	182.8	0.64394	182.8	0.46413	1828	0.80588	1828	0.6125	1828	0.82619
1829	0.60619	182.9	0.64394	182.9	0.46431	1829	0.80588	1829	0.61244	1829	0.82625
1830	0.60669	183	0.64381	183	0.46456	1830	0.80581	1830	0.61238	1830	0.82625
1831	0.60688	183.1	0.64375	183.1	0.46475	1831	0.80581	1831	0.61238	1831	0.82631
1832	0.60656	183.2	0.6435	183.2	0.46488	1832	0.80581	1832	0.61231	1832	0.82638
1833	0.60625	183.3	0.64338	183.3	0.46494	1833	0.80575	1833	0.61231	1833	0.82644
1834	0.60606	183.4	0.64319	183.4	0.46506	1834	0.80569	1834	0.61225	1834	0.8265
1835	0.606	183.5	0.64313	183.5	0.46519	1835	0.80569	1835	0.61219	1835	0.8265
1836	0.6055	183.6	0.643	183.6	0.46538	1836	0.80563	1836	0.61219	1836	0.82663
1837	0.60538	183.7	0.64294	183.7	0.46563	1837	0.80563	1837	0.61213	1837	0.82663
1838	0.60494	183.8	0.64294	183.8	0.46575	1838	0.80556	1838	0.61206	1838	0.82669
1839	0.60488	183.9	0.64281	183.9	0.46594	1839	0.8055	1839	0.61206	1839	0.82675
1840	0.60475	184	0.64275	184	0.46594	1840	0.8055	1840	0.612	1840	0.82675
1841	0.60488	184.1	0.64256	184.1	0.46606	1841	0.80544	1841	0.612	1841	0.82681
1842	0.60481	184.2	0.64244	184.2	0.46619	1842	0.80538	1842	0.612	1842	0.82681
1843	0.60475	184.3	0.64225	184.3	0.46644	1843	0.80538	1843	0.61194	1843	0.82688
1844	0.60481	184.4	0.64213	184.4	0.46663	1844	0.80531	1844	0.61194	1844	0.82688
1845	0.60456	184.5	0.64206	184.5	0.46675	1845	0.80525	1845	0.61194	1845	0.82694
1846	0.60406	184.6	0.642	184.6	0.46694	1846	0.80525	1846	0.61188	1846	0.82694
1847	0.60431	184.7	0.64188	184.7	0.467	1847	0.80519	1847	0.61188	1847	0.82694
1848	0.60438	184.8	0.64188	184.8	0.46706	1848	0.80519	1848	0.61181	1848	0.82694
1849	0.60475	184.9	0.64175	184.9	0.46713	1849	0.80513	1849	0.61181	1849	0.827
1850	0.60525	185	0.64163	185	0.46731	1850	0.80513	1850	0.61175	1850	0.827
1851	0.60556	185.1	0.64144	185.1	0.46756	1851	0.80506	1851	0.61175	1851	0.827
1852	0.606	185.2	0.64125	185.2	0.46775	1852	0.80506	1852	0.61169	1852	0.82706
1853	0.60606	185.3	0.64119	185.3	0.46788	1853	0.805	1853	0.61163	1853	0.82706
1854	0.60619	185.4	0.64106	185.4	0.46794	1854	0.805	1854	0.61163	1854	0.82713
1855	0.60619	185.5	0.641	185.5	0.46806	1855	0.805	1855	0.61156	1855	0.82713
1856	0.60613	185.6	0.64094	185.6	0.46819	1856	0.805	1856	0.6115	1856	0.82713
1857	0.60594	185.7	0.64088	185.7	0.46838	1857	0.80494	1857	0.61144	1857	0.82719
1858	0.60563	185.8	0.64075	185.8	0.46863	1858	0.80494	1858	0.61144	1858	0.82719
1859	0.60544	185.9	0.64069	185.9	0.46875	1859	0.80494	1859	0.61138	1859	0.82725
1860	0.60519	186	0.6405	186	0.46888	1860	0.80488	1860	0.61131	1860	0.82725
1861	0.60506	186.1	0.64038	186.1	0.46894	1861	0.80488	1861	0.61125	1861	0.82731
1862	0.605	186.2	0.64019	186.2	0.469	1862	0.80488	1862	0.61125	1862	0.82738
1863	0.60494	186.3	0.64013	186.3	0.46919	1863	0.80481	1863	0.61119	1863	0.82738
1864	0.60481	186.4	0.64	186.4	0.46931	1864	0.80481	1864	0.61119	1864	0.82744
1865	0.60475	186.5	0.63994	186.5	0.46956	1865	0.80475	1865	0.61113	1865	0.82744
1866	0.60481	186.6	0.63988	186.6	0.46975	1866	0.80475	1866	0.61113	1866	0.8275
1867	0.60475	186.7	0.63975	186.7	0.46988	1867	0.80469	1867	0.61106	1867	0.8275
1868	0.60481	186.8	0.63963	186.8	0.46994	1868	0.80469	1868	0.61106	1868	0.82756
1869	0.60456	186.9	0.6395	186.9	0.47	1869	0.80463	1869	0.611	1869	0.82756
1870	0.60463	187	0.63938	187	0.47013	1870	0.80456	1870	0.611	1870	0.82763
1871	0.60463	187.1	0.63919	187.1	0.47025	1871	0.80456	1871	0.61094	1871	0.82769
1872	0.60444	187.2	0.63913	187.2	0.4705	1872	0.8045	1872	0.61094	1872	0.82769
1873	0.60456	187.3	0.639	187.3	0.47069	1873	0.80444	1873	0.61094	1873	0.82775
1874	0.60494	187.4	0.639	187.4	0.47088	1874	0.80444	1874	0.61088	1874	0.82775
1875	0.60519	187.5	0.63888	187.5	0.47094	1875	0.80438	1875	0.61088	1875	0.82775
1876	0.60531	187.6	0.63881	187.6	0.471	1876	0.80438	1876	0.61088	1876	0.82781
1877	0.60575	187.7	0.63869	187.7	0.47113	1877	0.80431	1877	0.61081	1877	0.82781
1878	0.60594	187.8	0.63856	187.8	0.47131	1878	0.80425	1878	0.61075	1878	0.82788
1879	0.60594	187.9	0.63844	187.9	0.4715	1879	0.80425	1879	0.61075	1879	0.82788
1880	0.60631	188	0.63825	188	0.47169	1880	0.80419	1880	0.61069	1880	0.82788
1881	0.60619	188.1	0.63819	188.1	0.47181	1881	0.80419	1881	0.61069	1881	0.82788
1882	0.60606	188.2	0.638	188.2	0.47194	1882	0.80413	1882	0.61063	1882	0.82788
1883	0.60619	188.3	0.638	188.3	0.472	1883	0.80413	1883	0.61056	1883	0.82794
1884	0.60619	188.4	0.63788	188.4	0.47206	1884	0.80406	1884	0.6105	1884	0.82794
1885	0.60625	188.5	0.63781	188.5	0.47225	1885	0.80406	1885	0.6105	1885	0.82794
1886	0.60613	188.6	0.63769	188.6	0.47244	1886	0.80406	1886	0.61044	1886	0.82794
1887	0.606	188.7	0.63756	188.7	0.47263	1887	0.804	1887	0.61038	1887	0.82794
1888	0.606	188.8	0.6375	188.8	0.47281	1888	0.804	1888	0.61031	1888	0.82794
1889	0.60575	188.9	0.63731	188.9	0.47294	1889	0.804	1889	0.61025	1889	0.828
1890	0.60588	189	0.63719	189	0.473	1890	0.80394	1890	0.61025	1890	0.828
1891	0.60563	189.1	0.63706	189.1	0.47313	1891	0.80394	1891	0.61019	1891	0.828
1892	0.60525	189.2	0.637	189.2	0.47325	1892	0.80394	1892	0.61019	1892	0.828
1893	0.60538	189.3	0.63694	189.3	0.47344	1893	0.80394	1893	0.61013	1893	0.828
1894	0.60469	189.4	0.63688	189.4	0.47363	1894	0.80388	1894	0.61013	1894	0.828
1895	0.60506	189.5	0.63675	189.5	0.47381	1895	0.80388	1895	0.61006	1895	0.82806
1896	0.60513	189.6	0.63663	189.6	0.47394	1896	0.80388	1896	0.61006	1896	0.82806
1897	0.60519	189.7	0.63644	189.7	0.474	1897	0.80381	1897	0.61006	1897	0.82806
1898	0.60506	189.8	0.63638	189.8	0.47406	1898	0.80381	1898	0.61	1898	0.82806
1899	0.605	189.9	0.63619	189.9	0.47419	1899	0.80375	1899	0.61	1899	0.82806
1900	0.60513	190	0.63613	190	0.47438	1900	0.80375	1900	0.60994	1900	0.82813
1901	0.60506	190.1	0.636	190.1	0.47456	1901	0.80375	1901	0.60994	1901	0.82813
1902	0.60525	190.2	0.636	190.2	0.47475	1902	0.80369	1902	0.60994	1902	0.82813
1903	0.60525	190.3	0.63588	190.3	0.47488	1903	0.80363	1903	0.60988	1903	0.82813
1904	0.60538	190.4	0.63575	190.4	0.475	1904	0.80363	1904	0.60988	1904	0.82819
1905	0.60513	190.5	0.63563	190.5	0.475	1905	0.80356	1905	0.60988	1905	0.82819
1906	0.60494	190.6	0.63544	190.6	0.47519	1906	0.80356	1906	0.60981	1906	0.82819
1907	0.60494	190.7	0.63538	190.7	0.47531	1907	0.8035	1907	0.60981	1907	0.82819
1908	0.60513	190.8	0.63519	190.8	0.47556	1908	0.80344	1908	0.60975	1908	0.82825
1909	0.60531	190.9	0.63513	190.9	0.47569	1909	0.80344	1909	0.60975	1909	0.82825
1910	0.60588	191	0.635	191	0.47588	1910	0.80338	1910	0.60969	1910	0.82825
1911	0.6055	191.1	0.63494	191.1	0.47594	1911	0.80331	1911	0.60963	1911	0.82825
1912	0.60625	191.2	0.63488	191.2	0.476	1912	0.80331	1912	0.60963	1912	0.82825
1913	0.60644	191.3	0.63481	191.3	0.47613	1913	0.80325	1913	0.60956	1913	0.82831
1914	0.6065	191.4	0.63469	191.4	0.47625	1914	0.80325	1914	0.6095	1914	0.82831
1915	0.60681	191.5	0.63456	191.5	0.4765	1915	0.80319	1915	0.6095	1915	0.82831
1916	0.60663	191.6	0.63431	191.6	0.47663	1916	0.80319	1916	0.60944	1916	0.82831
1917	0.60694	191.7	0.63425	191.7	0.47681	1917	0.80313	1917	0.60938	1917	0.82831
1918	0.60675	191.8	0.63406	191.8	0.47694	1918	0.80313	1918	0.60938	1918	0.82838
1919	0.60669	191.9	0.63406	191.9	0.477	1919	0.80306	1919	0.60931	1919	0.82838
1920	0.60669	192	0.63394	192	0.47706	1920	0.80306	1920	0.60925	1920	0.82844
1921	0.60656	192.1	0.63394	192.1	0.47719	1921	0.80306	1921	0.60925	1921	0.82844
1922	0.60631	192.2	0.63381	192.2	0.47744	1922	0.803	1922	0.60919	1922	0.82844
1923	0.60625	192.3	0.63375	192.3	0.47763	1923	0.803	1923	0.60919	1923	0.82844
1924	0.60606	192.4	0.63356	192.4	0.47775	1924	0.803	1924	0.60913	1924	0.82844
1925	0.60588	192.5	0.63338	192.5	0.47788	1925	0.80294	1925	0.60913	1925	0.8285
1926	0.60569	192.6	0.63325	192.6	0.47794	1926	0.80294	1926	0.60906	1926	0.8285
1927	0.60575	192.7	0.63313	192.7	0.478	1927	0.80294	1927	0.60906	1927	0.8285
1928	0.60563	192.8	0.63306	192.8	0.47819	1928	0.80294	1928	0.609	1928	0.8285
1929	0.60563	192.9	0.633	192.9	0.47831	1929	0.80288	1929	0.609	1929	0.8285
1930	0.60569	193	0.63288	193	0.47856	1930	0.80288	1930	0.60894	1930	0.8285
1931	0.60569	193.1	0.63288	193.1	0.47869	1931	0.80288	1931	0.60894	1931	0.82856
1932	0.6055	193.2	0.63269	193.2	0.47881	1932	0.80281	1932	0.60894	1932	0.82856
1933	0.60563	193.3	0.63263	193.3	0.47894	1933	0.80281	1933	0.60888	1933	0.82856
1934	0.60538	193.4	0.63244	193.4	0.479	1934	0.80281	1934	0.60888	1934	0.82856
1935	0.60544	193.5	0.63225	193.5	0.47913	1935	0.80275	1935	0.60881	1935	0.82856
1936	0.6055	193.6	0.63219	193.6	0.47925	1936	0.80275	1936	0.60875	1936	0.82863
1937	0.60556	193.7	0.63206	193.7	0.4795	1937	0.80269	1937	0.60875	1937	0.82856
1938	0.6055	193.8	0.632	193.8	0.47963	1938	0.80269	1938	0.60869	1938	0.82863
1939	0.60538	193.9	0.63194	193.9	0.47981	1939	0.80263	1939	0.60863	1939	0.82863
1940	0.6055	194	0.63188	194	0.47994	1940	0.80263	1940	0.60863	1940	0.82863
1941	0.60581	194.1	0.63175	194.1	0.48	1941	0.80256	1941	0.60856	1941	0.82863
1942	0.60594	194.2	0.63169	194.2	0.48006	1942	0.80256	1942	0.6085	1942	0.82863
1943	0.60631	194.3	0.63144	194.3	0.48019	1943	0.8025	1943	0.60844	1943	0.82863
1944	0.6065	194.4	0.63131	194.4	0.48038	1944	0.80244	1944	0.60844	1944	0.82863
1945	0.60681	194.5	0.63119	194.5	0.48056	1945	0.80244	1945	0.60838	1945	0.82869
1946	0.60706	194.6	0.63113	194.6	0.48075	1946	0.80238	1946	0.60831	1946	0.82869
1947	0.60706	194.7	0.631	194.7	0.48088	1947	0.80238	1947	0.60831	1947	0.82869
1948	0.60706	194.8	0.63094	194.8	0.48094	1948	0.80231	1948	0.60825	1948	0.82869
1949	0.60713	194.9	0.63094	194.9	0.48106	1949	0.80231	1949	0.60825	1949	0.82869
1950	0.60719	195	0.63081	195	0.48119	1950	0.80225	1950	0.60819	1950	0.82869
1951	0.60681	195.1	0.63075	195.1	0.48131	1951	0.80225	1951	0.60819	1951	0.82869
1952	0.6065	195.2	0.6305	195.2	0.48156	1952	0.80219	1952	0.60813	1952	0.82869
1953	0.60638	195.3	0.63038	195.3	0.48175	1953	0.80219	1953	0.60813	1953	0.82869
1954	0.60613	195.4	0.63025	195.4	0.48181	1954	0.80213	1954	0.60813	1954	0.82869
1955	0.60594	195.5	0.63013	195.5	0.48194	1955	0.80213	1955	0.60806	1955	0.82869
1956	0.60588	195.6	0.63006	195.6	0.482	1956	0.80206	1956	0.60806	1956	0.82869
1957	0.60575	195.7	0.63	195.7	0.48206	1957	0.80206	1957	0.60806	1957	0.82869
1958	0.60563	195.8	0.62994	195.8	0.48219	1958	0.80206	1958	0.60806	1958	0.82869
1959	0.60563	195.9	0.62988	195.9	0.48238	1959	0.80206	1959	0.608	1959	0.82869
1960	0.60556	196	0.62975	196	0.48256	1960	0.802	1960	0.608	1960	0.82869
1961	0.60556	196.1	0.62969	196.1	0.48275	1961	0.802	1961	0.608	1961	0.82869
1962	0.60556	196.2	0.62944	196.2	0.48288	1962	0.802	1962	0.60794	1962	0.82869
1963	0.60544	196.3	0.62931	196.3	0.48294	1963	0.80194	1963	0.60794	1963	0.82869
1964	0.60569	196.4	0.62919	196.4	0.48306	1964	0.80194	1964	0.60794	1964	0.82869
1965	0.6055	196.5	0.62906	196.5	0.48319	1965	0.80194	1965	0.60788	1965	0.82869
1966	0.60563	196.6	0.629	196.6	0.48331	1966	0.80194	1966	0.60788	1966	0.82869
1967	0.60569	196.7	0.62894	196.7	0.48356	1967	0.80194	1967	0.60788	1967	0.82869
1968	0.6055	196.8	0.62894	196.8	0.48375	1968	0.80188	1968	0.60788	1968	0.82869
1969	0.6055	196.9	0.62881	196.9	0.48381	1969	0.80188	1969	0.60781	1969	0.82869
1970	0.6055	197	0.62875	197	0.48394	1970	0.80188	1970	0.60781	1970	0.82869
1971	0.60544	197.1	0.62856	197.1	0.484	1971	0.80181	1971	0.60781	1971	0.82869
1972	0.60544	197.2	0.62838	197.2	0.48406	1972	0.80181	1972	0.60775	1972	0.82869
1973	0.60544	197.3	0.62825	197.3	0.48419	1973	0.80175	1973	0.60775	1973	0.82869
1974	0.60563	197.4	0.62813	197.4	0.48438	1974	0.80175	1974	0.60775	1974	0.82869
1975	0.60594	197.5	0.62806	197.5	0.48456	1975	0.80175	1975	0.60769	1975	0.82869
1976	0.60594	197.6	0.628	197.6	0.48475	1976	0.80169	1976	0.60769	1976	0.82869
1977	0.60619	197.7	0.62794	197.7	0.48494	1977	0.80169	1977	0.60763	1977	0.82869
1978	0.60644	197.8	0.62788	197.8	0.48494	1978	0.80163	1978	0.60763	1978	0.82869
1979	0.60656	197.9	0.62775	197.9	0.48506	1979	0.80163	1979	0.60756	1979	0.82869
1980	0.60681	198	0.62769	198	0.48519	1980	0.80156	1980	0.60756	1980	0.82869
1981	0.60713	198.1	0.62744	198.1	0.48531	1981	0.80156	1981	0.6075	1981	0.82869
1982	0.60713	198.2	0.62731	198.2	0.4855	1982	0.80156	1982	0.6075	1982	0.82869
1983	0.60719	198.3	0.62719	198.3	0.48575	1983	0.8015	1983	0.60744	1983	0.82869
1984	0.60713	198.4	0.62706	198.4	0.48581	1984	0.8015	1984	0.60738	1984	0.82863
1985	0.607	198.5	0.627	198.5	0.48594	1985	0.80144	1985	0.60738	1985	0.82863
1986	0.60688	198.6	0.62694	198.6	0.486	1986	0.80144	1986	0.60731	1986	0.82863
1987	0.60681	198.7	0.62694	198.7	0.48606	1987	0.80138	1987	0.60731	1987	0.82863
1988	0.60656	198.8	0.62681	198.8	0.48619	1988	0.80138	1988	0.60725	1988	0.82863
1989	0.60638	198.9	0.62675	198.9	0.48631	1989	0.80131	1989	0.60725	1989	0.82863
1990	0.60613	199	0.62656	199	0.4865	1990	0.80131	1990	0.60719	1990	0.82863
1991	0.60606	199.1	0.62638	199.1	0.48675	1991	0.80125	1991	0.60719	1991	0.82863
1992	0.606	199.2	0.62625	199.2	0.48688	1992	0.80125	1992	0.60719	1992	0.82863
1993	0.60594	199.3	0.62613	199.3	0.48694	1993	0.80119	1993	0.60713	1993	0.82856
1994	0.60594	199.4	0.62606	199.4	0.487	1994	0.80119	1994	0.60713	1994	0.82856
1995	0.606	199.5	0.626	199.5	0.48713	1995	0.80119	1995	0.60713	1995	0.82856
[truncated: 33,618 more rows]
